1

2

3           **Evolutionary forecasting of phenotypic and genetic**  
4           **outcomes of experimental evolution in *Pseudomonas***

5

6

Peter A. Lind<sup>1</sup>

7

8

9           <sup>1</sup> Department of Molecular Biology, Umeå University, Umeå, Sweden.

10

11

12           Correspondence and requests for materials should be addressed to  
13           Peter A. Lind, Dept. Molecular Biology, Umeå University, SE-901 87 Umeå,  
14           Sweden.

15           email: peter.lind@umu.se

16           Keywords: *Pseudomonas*, experimental evolution, genetic architecture, c-di-GMP,  
17           evolutionary predictability, evolutionary forecasting

18

19           Short title: Forecasting experimental evolution

20

21           Impact statement: Conservation of genotype-to-phenotype maps allows successful  
22           prediction of short-term evolution in *P. protegens* Pf-5 and lays the foundation for  
23           evolutionary forecasting in other *Pseudomonas*.

24

25 **Abstract**

26 Experimental evolution is often highly repeatable, but the underlying causes are  
27 generally unknown, which prevents extension of evolutionary forecasts to related  
28 species. Data on adaptive phenotypes, mutation rates and targets from the  
29 *Pseudomonas fluorescens* SBW25 Wrinkly Spreader system combined with  
30 mathematical models of the genotype-to-phenotype map allowed evolutionary  
31 forecasts to be made for several related *Pseudomonas* species. Predicted outcomes of  
32 experimental evolution in terms of phenotype, types of mutations, relative rates of  
33 pathways and mutational targets were then tested in *Pseudomonas protegens* Pf-5. As  
34 predicted, most mutations were found in three specific regulatory pathways resulting  
35 in increased production of Pel exopolysaccharide. Mutations were, as predicted,  
36 mainly found to disrupt negative regulation with a smaller number in upstream  
37 promoter regions. Mutated regions in proteins could also be predicted, but most  
38 mutations were not identical to those previously found. This study demonstrates the  
39 potential of short-term evolutionary forecasting in experimental populations.

40

## 41 Introduction

42 An increasing number of experimental evolution studies, primarily using microbes,  
43 have provided insights into many fundamental questions in evolutionary biology  
44 including the repeatability of evolutionary processes (Barrick and Lenski 2013;  
45 Jerison and Desai 2015; Long, et al. 2015; Orgogozo 2015; Blount, et al. 2018).  
46 Given the ability to control environmental conditions as well as population size and  
47 the use of a single asexual organism, such studies could provide an ideal test of our  
48 ability to predict evolutionary outcomes in simplified model systems. High  
49 repeatability on both phenotypic and genetic level have been observed in a large  
50 number of experimental evolution studies (Wichman, et al. 1999; Conrad, et al. 2009;  
51 Lee and Marx 2012; Tenaillon, et al. 2012; Barrick and Lenski 2013; Ferguson, et al.  
52 2013; Herron and Doebeli 2013; Blank, et al. 2014; McElroy, et al. 2014; Fraebel, et  
53 al. 2017; Kram, et al. 2017; Blount, et al. 2018; Knöppel, et al. 2018), but it has  
54 become clear that high repeatability alone is not sufficient for testing evolutionary  
55 predictability beyond the prediction that under identical conditions the same  
56 evolutionary outcome is likely. The difficulties of moving from repeatability to  
57 predictability are largely a result of the lack of knowledge of the genotype-phenotype-  
58 fitness map (Figure 1).

59

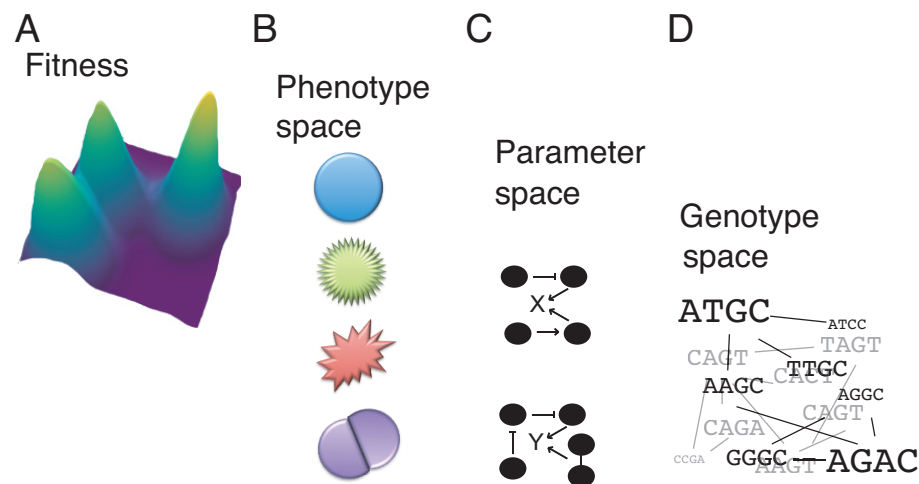

60

61 **Figure 1. Prediction of the adaptive outcomes of experimental evolution requires**  
62 **understanding of how genotypes map to phenotypes and fitness.** The differing  
63 capacity of genes to translate genotypic variation into phenotypic variation and  
64 differences in mutation rates can introduce biases in the production of phenotypic

65 variation. Natural selection, genetic architecture and mutational biases can both  
66 increase and decrease the predictability of evolution depending on if they can be  
67 recognized beforehand and included into evolutionary forecasting models. **(A)**  
68 **Fitness.** Mutants that increase to high frequencies in the population are all expected to  
69 have increased fitness as drift is negligible at population sizes typically used for  
70 adaptation experiments with microbes. Much effort has been put into characterizing  
71 the distribution of fitness effects of beneficial mutations, but the shapes of the  
72 distribution and magnitudes of the fittest mutations appear to be highly context  
73 dependent. Many different phenotypes are typically adaptive during experimental  
74 evolution, but in most cases they are not known beforehand and their relative fitness  
75 cannot be predicted. Relative fitness is, in most cases, also expected to be highly  
76 dependent on external environment including the frequency of other adaptive mutants,  
77 which means that even small changes to experimental protocols can lead to  
78 differences in outcomes. **(B) Phenotype space.** Each of the adaptive phenotypes can  
79 usually be realized by mutations in different positions and in different genes, but  
80 distinct phenotypes are expected to have similar fitness regardless of genetic  
81 foundations, which can simplify predictions. Depending on the genetic architecture  
82 underlying each trait, which is often unknown, adaptive phenotypes are produced at  
83 different rates. **(C) Parameter space.** The adaptive phenotypes are caused by changes  
84 in the molecular networks of cells, which are also influenced by the external  
85 environment. If the wiring of a molecular network underpinning an adaptive  
86 phenotype is well understood, parameterization of the system is possible and  
87 predictive models can be formulated. Mutations can cause functional effects on gene  
88 products, but mutations in some genes are more likely to lead to phenotypic variation.  
89 This can for example be due to differences in mutational robustness of the gene  
90 products themselves or their functions in regulatory networks. **(D) Genotype space.**  
91 Mutation rates are not uniform across the genome and mutational hot spots can lead to  
92 bias in the number of mutants producing relevant changes in parameter space and  
93 causing new phenotypes that are presented for natural selection to act upon. The  
94 current understanding of the distribution of mutation rates is limited and  
95 computational predictions have not yet been described. Adding information about  
96 well-characterized mutational hot spots, including indels in homonucleotide tracts or  
97 deletion and duplication between sequence homologies, could possibly improve  
98 prediction compared to a null model with uniform rates. Alternatively experimental

99 data might be incorporated into models of mutation rates to improve predictions  
100 (Lind, et al. 2019).

101

102 There are several problems that need to be solved to develop a model system for true  
103 testing of predictive ability. In some cases adaptive mutations are highly strain  
104 specific, so that for example adaptation of different strains to a specific environment  
105 will produce different results. This is sometime due to the long history of sub-  
106 culturing under laboratory conditions combined with rounds of mutagenesis that has  
107 caused, for example, many *E. coli* and *Salmonella* strains to accumulate diverse  
108 mutations, some of which are rapidly compensated by secondary mutations restoring  
109 fitness (Barrick, et al. 2009; Tenaillon, et al. 2012; Knöppel, et al. 2018). Thus, in  
110 many cases conclusions from one strain cannot be extended to another because of  
111 differences in their genotype-to-phenotype maps (Figure 1C).

112

113 Another problem for testing predictability is that in many cases it is not possible to  
114 design an experiment where one specific selective pressure is dominant. For example  
115 experiments with intended adaptation to high temperature (Tenaillon, et al. 2012) or  
116 freeze-thaw-growth cycles (Sleight, et al. 2008) result in similar mutations in *uspA*,  
117 which may indicate adaptation to the medium used (Knöppel, et al. 2018) or generally  
118 stressful conditions. Relatively minor changes in environmental conditions can also  
119 results in divergent mutational patterns (Deatherage, et al. 2017). This means that the  
120 range of possible adaptive phenotypes cannot be defined beforehand (Figure 1B) and  
121 that in many cases the phenotypes that solve the intended selective problem are  
122 outcompeted by other phenotypes with increased fitness (Figure 1A).

123

124 A highly specific selective pressure can be applied by selection for antibiotic  
125 resistance and mutation targets are often highly conserved between different strains  
126 and species and between laboratory and natural populations (O'Neill, et al. 2006;  
127 Schenk, et al. 2012; Brandis, et al. 2015; Jahn, et al. 2017; Lukacisinova and  
128 Bollenbach 2017; Sommer, et al. 2017). However resistance phenotypes are typically  
129 explained solely by the molecular phenotype of a single protein and no alternative  
130 pathways to resistance are known resulting in a relatively simple parameter and  
131 genotype space (Figure 1C, Figure 1D). Thus the prediction will be identical for all  
132 species and it cannot provide a test of prediction from general principles. In many

133 cases mutants isolated after selection for high-level antibiotic resistance also lacks the  
134 complexity that is inherent to many phenotypic traits where the genotype-to-  
135 phenotype map involves a large number of functional interactions and complex  
136 regulation (Figure 1C). This complexity comes to light in that mutations allowing  
137 adaptation to new environments are commonly found in global regulators of gene  
138 expression such as genes involved in the stringent response, DNA binding proteins,  
139 supercoiling and core genes for RNA and protein synthesis (Barrick, et al. 2009;  
140 Conrad, et al. 2009; Kishimoto, et al. 2010; Tenaillon, et al. 2012; Herron and  
141 Doebeli 2013; Sandberg, et al. 2014; LaCroix, et al. 2015; Deatherage, et al. 2017).  
142 The physiological effects of these mutations are diverse, sometimes affecting the  
143 expression of hundreds of genes making the elucidation of the molecular  
144 underpinnings of the adaptive phenotype (Figure 1C, 1D) extremely complex and thus  
145 difficult to use for predictive modeling.

146

147 The wrinkly spreader model in *P. fluorescens* SBW25 (hereafter SBW25) is one of  
148 the best-characterized experimental evolution systems and has several properties that  
149 could make it possible to extend knowledge and principles from this species to related  
150 species (Rainey and Travisano 1998; Spiers, et al. 2002; Spiers, et al. 2003; Spiers  
151 and Rainey 2005; Goymer, et al. 2006; Bantinaki, et al. 2007; McDonald, et al. 2009;  
152 Silby, et al. 2009; Ferguson, et al. 2013; Lind, et al. 2015, 2017b; Lind, et al. 2019).  
153 When the wild type SBW25 is placed into a static growth tube the oxygen in the  
154 medium is rapidly consumed by growing bacteria (Figure 2A). However oxygen  
155 levels at the surface are high and mutants that are able to colonize the air-liquid  
156 interface have a major growth advantage and rapidly increase in frequency (Figure  
157 2A). Several phenotypic solutions to air-liquid interface colonization, all involving  
158 increased cell-cell adhesion, have been described and are distinguishable by their  
159 colony morphology on agar plates (Figure 2A, 2B) (Rainey and Travisano 1998;  
160 Ferguson, et al. 2013; Lind, et al. 2017b). The most successful of these is the Wrinkly  
161 Spreader (WS) (Ferguson, et al. 2013; Lind, et al. 2017b) that overproduces a  
162 cellulosic polymer that is the main structural component of the mat at the air-liquid  
163 interface (Spiers, et al. 2002; Spiers, et al. 2003). The WS phenotype is caused by  
164 mutational activation of c-di-GMP production by a diguanylate cyclase (DGC)  
165 (Figure 2C) (Goymer, et al. 2006). While many different DGCs can be activated to  
166 reach the WS phenotype, some are greatly overrepresented due to larger mutational

167 target sizes leading to a hierarchy of genetic routes to WS (Figure 2D) (McDonald, et  
 168 al. 2009; Lind, et al. 2015). The genotype-to-phenotype map to WS has been  
 169 characterized in detail (Goymer, et al. 2006; McDonald, et al. 2009; Lind, et al. 2019)  
 170 allowing the development of mathematical models of the three main pathways to WS  
 171 (Wsp, Aws and Mws) and the prediction of evolutionary outcomes (Figure 2E) (Lind,  
 172 et al. 2019).  
 173

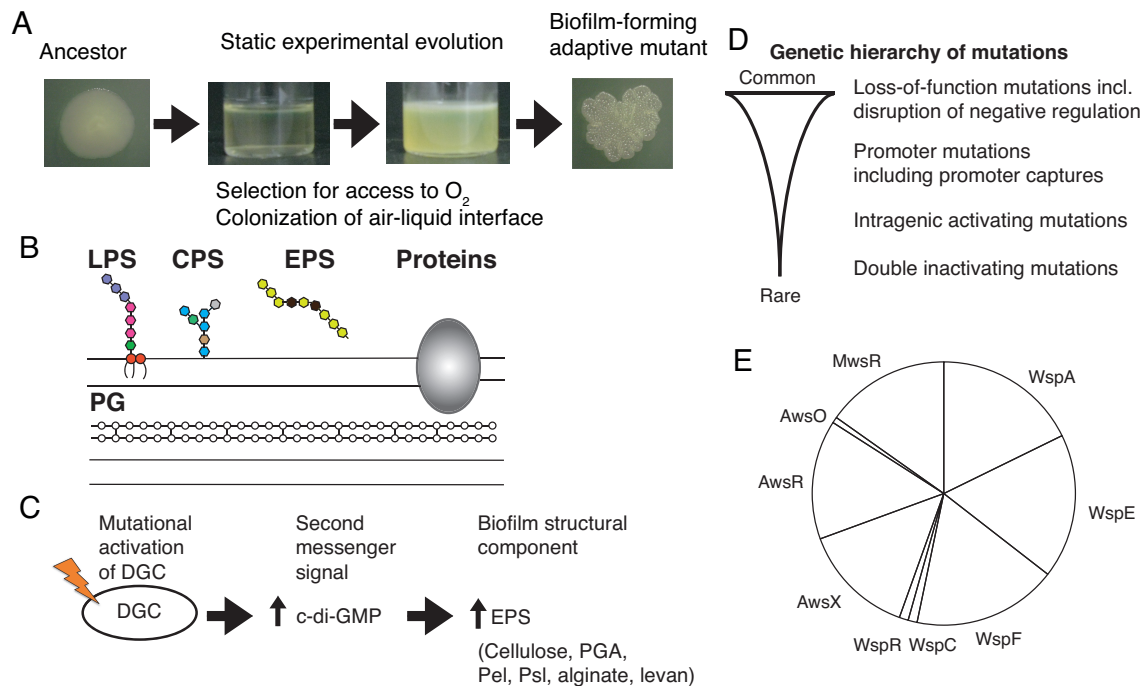

174  
 175 **Figure 2.** The *Pseudomonas fluorescens* SBW25 “wrinkly spreader” model system  
 176 has several properties that could allow its extension to other species (A) The ancestral  
 177 strain that has smooth colony morphology on agar plate is inoculated into static  
 178 growth tubes and incubated for several days. Depletion of oxygen in the medium  
 179 leads to competition for access to the oxygen-replete surface which is colonized by  
 180 mutants with enhanced ability for cell-cell adherence and adherence to the wall of the  
 181 tube. The most successful of these mutant types is the wrinkly spreader that has a  
 182 distinctive colony morphology due to overproduction of exopolymeric substances  
 183 (EPSs) of which a cellulosic polymer is the main structural component (Spiers, et al.  
 184 2002; Spiers, et al. 2003; Ferguson, et al. 2013; Lind, et al. 2017b) (B) The cell wall  
 185 of Gram-negative bacteria, such as *Pseudomonas*, presents several components that  
 186 may be used to increase cell-to-cell adhesion and attachment to surfaces. In addition  
 187 to different EPSs, capsular polysaccharides (CPSs) and lipopolysaccharides (LPS)  
 188 might also be used. A variety of different types of proteins including adhesins,

189 glycoproteins, fimbriae and pili are also potential phenotypic solutions and  
190 incomplete cleavage of the peptidoglycan (PG) layer can lead to cell-chaining thereby  
191 increasing cell-cell adhesion. In *Pseudomonas fluorescens* at least four alternative  
192 distinct phenotypes are selected for at the surface, involving an alternative EPS, CPS,  
193 LPS and PG, but they all have lower fitness than the WS type (Beaumont, et al. 2009;  
194 Ferguson, et al. 2013; Gallie, et al. 2015; Lind, et al. 2017b). The wrinkly spreader  
195 system is of intermediate complexity in that it allows isolation of a phenotypic subset  
196 of adaptive mutants, those that are selected at the air-liquid interface and produce a  
197 difference in colony morphology, rather than all mutants that increase fitness.  
198 However there is also a large diversity of different genetic and phenotypic solutions to  
199 the dominant adaptive challenge, which makes it of greater complexity than systems  
200 based on single genes, which is often the case for experimental systems using strong  
201 selection for antibiotic resistance. **(C)** The mutational causes of the high fitness WS  
202 phenotype in wild type populations are found in either of three loci, *wspABCDEFR*,  
203 *awsXRO* and *mwsR*, which all encode diguanylate cyclases that produce the second  
204 messenger c-di-GMP (McDonald, et al. 2009) that is a conserved signal for EPS  
205 production and biofilm formation in many bacterial species. In SBW25 the primary  
206 EPS used is a cellulosic polymer. **(D)** While these three pathways account for >98%  
207 of WS mutants in the wild type, 13 additional rare pathways were found when the  
208 common ones are genetically deleted (Lind, et al. 2015). The large differences in  
209 mutation rates to WS for the different pathways are explained mainly by their  
210 different capacities to translate genotypic variation into phenotypic variation, i.e.  
211 mutational target size, with the three common pathways being subject to negative  
212 regulation, which when disrupted results in overproduction of c-di-GMP and the WS  
213 phenotype (Lind, et al. 2015). The alternative phenotypic solutions are also caused by  
214 inactivating mutations occurring at high rates (Ferguson, et al. 2013; Lind, et al.  
215 2017b). The pathways to WS of intermediate frequency are activated by mutations to  
216 promoter regions, including promoter captures and the most rare are those that require  
217 specific activating mutations in the DGC or double mutations in two negative  
218 regulators. The genetic underpinnings of several adaptive phenotypes have been  
219 elucidated providing a mechanistic understanding of the effects of mutations and why  
220 they are adaptive. **(E)** The three main pathways (Wsp, Aws, Mws) to WS are  
221 particularly well-understood allowing formulation of mathematical models of the



222 molecular networks and prediction of the relative rates of use of the different  
 223 pathways and genes (Lind, et al. 2019).

224

225 This study makes initial forecasts of phenotypic and genetic evolutionary outcomes  
 226 after static experimental evolution for six *Pseudomonas* species based mainly on their  
 227 genome sequence and data from SBW25 (McDonald, et al. 2009; McDonald, et al.  
 228 2011; Ferguson, et al. 2013; Lind, et al. 2015, 2017b). Predictions of evolutionary  
 229 outcomes were then experimentally tested for the closely related species, *P. protegens*  
 230 Pf-5 (hereafter Pf-5) with a highly conserved genetic repertoire of DGCs but that  
 231 lacks the main structural component used by WS types in SBW25. Results show that  
 232 phenotypes, order of pathways used and types of mutations can be predicted and that  
 233 forecasts are robust to changes in environmental conditions.

234

## 235 Results

236 Six *Pseudomonas* species (Figure 3 legend) were chosen based on phylogenetic  
 237 diversity and their complement of DGCs and EPSs for a first round of predictions.

238 These species encode from none to all three of the main DGCs used in SBW25 and  
 239 only three species contain genes related to cellulose biosynthesis, the main EPS used  
 240 in SBW25 (Figure 3). Full details are available in Figure 3 - source data.

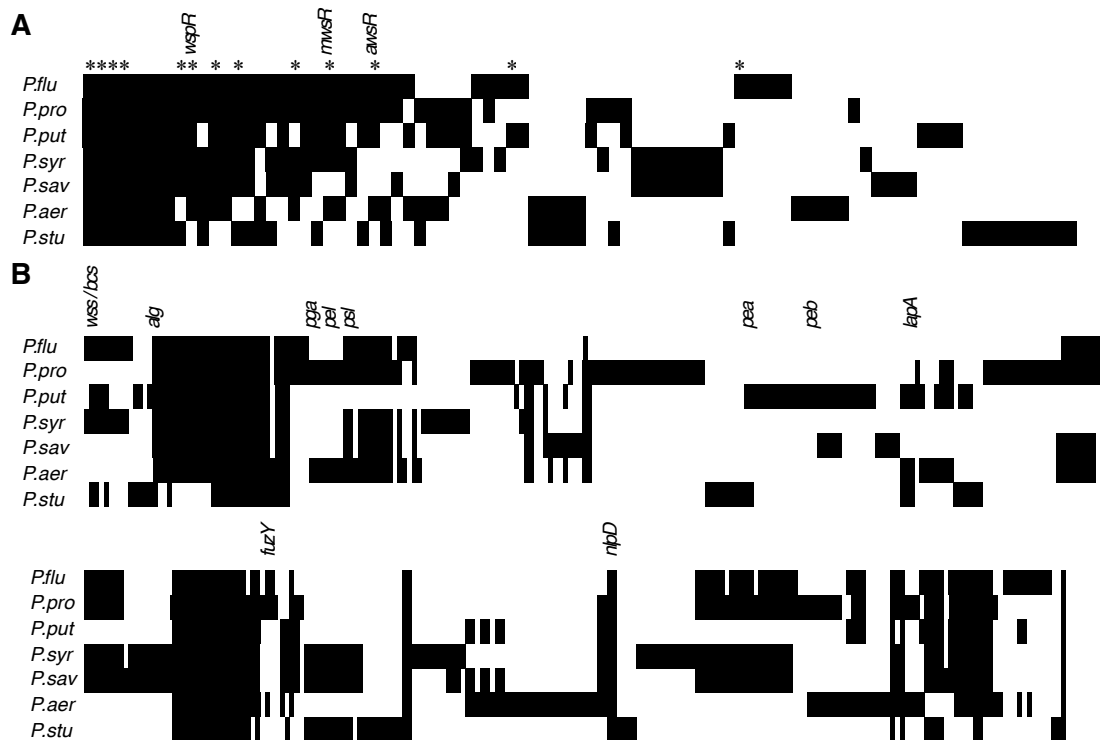

241

242 **Fig 3. Diversity of DGCs and biofilm-related genes for seven *Pseudomonas***  
243 **species** (*P. fluorescens* SBW25, *P. protegens* Pf-5, *P. putida* KT2440, *P. syringae* pv.  
244 tomato DC3000, *P. savastanoi* pv. phaseolicola 1448A, *P. aeruginosa* PAO1, *P.*  
245 *stutzeri* ATCC 17588) (A) The seven species encode 251 putative DGCs, divided into  
246 87 different homolog groups of which 8 are present in all genomes. WS mutations in  
247 SBW25 have been found affecting 13 of these DGCs (marked with \*) with an  
248 additional nine that have been detected only in combinations with other mutations.  
249 SBW25 and Pf-5 share 33 DGCs with 6 unique for each species. It should be noted  
250 that not all DGCs are likely to be catalytically active. (B) Diversity of biofilm-related  
251 genes including putative EPSs, LPS modification, cell chaining, adhesins and known  
252 regulators. In SBW25 cellulose-based mats are most successful (encoded by the *wss*  
253 operon). A secondary exopolysaccharide (PGA), encoded by *pgaABCD*, can also be  
254 used to form a stable mat (Lind, et al. 2017b). Fuzzy spreaders (FS) forms rafts that  
255 collapse after becoming too large and the mutational cause is inactivation of *fuzY*,  
256 which results in a defect in lipopolysaccharide (LPS) modification (Ferguson, et al.  
257 2013). Cell-chaining (CC) types have loss-of-function mutations in *nlpD* causing a  
258 defect in cell division, which leads to segmented chains of cells that can form a weak  
259 mat at the surface (Lind, et al. 2017b). The genomes of the *P. aeruginosa* strains PA7,  
260 UCBPP-PA14 and LESB58 were also included in the analysis and results were in  
261 most cases identical to PAO1 (not shown in Figure 3) with the exception of an  
262 absence of homologues for EPS genes *pelA-D* and the DGCs PA2771 in PA14 and  
263 PA3343 in PA7.

264

### 265 **Ecotype predictions**

266 Given the range of ways that cells can achieve increased adherence and surface  
267 colonization by use of different EPSs, LPS modification and cell chaining as  
268 demonstrated by the studies with SBW25 (Spiers, et al. 2002; Ferguson, et al. 2013;  
269 Lind, et al. 2017b) all species are expected to colonize the air-liquid interface if  
270 access to oxygen is limiting for growth. This could be achieved simply by changes in  
271 gene expression in the wild type, but for an experimental evolution study a mutational  
272 solution is sought and environmental conditions are chosen so that the wild type strain  
273 does not colonize the air-liquid interface. However changing environment presents a  
274 further challenge because, as discussed above, it often leads to a different spectrum of  
275 adaptive mutations. Thus a foundational requirement for an extended experimental

276 evolution system to be successful for different species is that the evolutionary  
277 solutions are robust to differences in environmental conditions.

278

### 279 **Phenotype predictions**

280 Several different phenotypic solutions can be used to colonize the air-liquid interface  
281 in SBW25 including at least two different EPSs (cellulose (WS) and PGA (PWS),  
282 LPS modification (fuzzy spreaders FS) and cell chaining (CC) (Spiers, et al. 2002;  
283 Ferguson, et al. 2013; Lind, et al. 2017b). However wrinkly spreaders that form  
284 cellulose-based mats are superior and rapidly outcompete all other types (Ferguson, et  
285 al. 2013; Lind, et al. 2017b). Based on the limited data available it is predicted that  
286 cellulose-based biofilms are superior in other species as well and that they will be the  
287 primary structural solution when available as for *P. syringae*, *P. putida* and *P.*  
288 *stutzeri*. For the three species lacking genes for cellulose biosynthesis, other EPSs are  
289 predicted to be used. Based on studies of *P. aeruginosa* the primary EPS required for  
290 pellicle formation at the air-liquid interface in this species is Pel, encoded by the  
291 *pelABCDEFG* operon, which is also present in the Pf-5 genome and is predicted to be  
292 the primary phenotypic solution for these species. The genome of *P. savastanoi* lacks  
293 genes for biosynthesis of cellulose and Pel as well as other EPSs that are known to be  
294 able to support mat-formation, such as PGA and there is not sufficient data at this  
295 point to make a prediction of which one is likely to be the primary phenotypic  
296 solution.

297

298 Overexpression of EPSs used for mat-formation at the air-liquid interface is in  
299 SBW25 and *P. aeruginosa* linked to mutations increasing c-di-GMP production rather  
300 than mutations in the promoters of, or genes in, the EPS operons themselves. This can  
301 be explained by the role of post-translation regulation by c-di-GMP in the production  
302 of cellulose, Pel, PGA and alginate (Lee, et al. 2007; Römling, et al. 2013; Steiner, et  
303 al. 2013; Morgan, et al. 2014; Liang 2015; Whitney, et al. 2015). In these cases  
304 transcriptional up-regulation alone is not sufficient to cause overproduction because  
305 of lack of a c-di-GMP signal. Possibly there is also an additional benefit to using  
306 activation of the c-di-GMP network in that it reduces motility, which is not needed  
307 when established at the air-liquid interface and which consumes large amount of  
308 energy to sustain and thus is likely to be selected against (Koskiniemi, et al. 2012; Lee  
309 and Marx 2012).

310

### 311 **Prediction of types of mutations**

312 Disabling mutations are expected to be more common than enabling mutations and  
313 therefore the prediction is that most mutations will be in genes where loss-of-function  
314 mutations produce an adaptive phenotype (Fig 2D) (Lind, et al. 2015). This is the case  
315 for the large majority of mutations in SBW25 including those activating main DGCs  
316 WspR, AwsR and MwsR, which are all under negative regulation, as well as  
317 disruption of the genes underpinning the FS phenotype (*fuzY*, PFLU0478) and CC  
318 phenotype (*nlpD*, PFLU1301) (McDonald, et al. 2009; Ferguson, et al. 2013; Lind, et  
319 al. 2017b). Next in the hierarchy of mutations are promoter mutations, increasing  
320 transcription, and promoter capture events (Lind, et al. 2015). Less common are  
321 intragenic activating mutations that enable a particular function by for example  
322 increase in catalytic activity or strengthening of interactions to another molecule or  
323 another domain of the same protein (Lind, et al. 2015). Gene duplications occur at a  
324 high rate and clearly have the ability to increase gene expression of DGCs, but they  
325 have not yet been found to cause WS in SBW25, possibly because a two-fold increase  
326 in gene expression is insufficient.

327

### 328 **Prediction of pathways used**

329 There are at least 16 different pathways to the WS phenotype in SBW25 with similar  
330 fitness, but they are used at frequencies that vary over several orders of magnitude  
331 based on the differing capacity to translate phenotypic variation into phenotypic  
332 variation (Figure 2D) (Lind, et al. 2015). Mutations in three pathways, Wsp, Aws, and  
333 Mws account for >98% of WS mutations and based on a detailed understanding of the  
334 molecular functions of the genes involved of each pathways mathematical models  
335 predicting at which relative rates the pathways should be used were constructed  
336 (Figure 2E) (Lind, et al. 2019). The prediction results varies depending on the rates of  
337 disabling and enabling mutations, but if it is assumed that disabling mutations are an  
338 order of magnitude more common than enabling mutations the models predict that  
339 Wsp will account for about 54%, Aws 30% and Mws 16% of the WS mutations  
340 (Figure 2E) (Lind, et al. 2019).

341

342 When the three common pathways are deleted WS types evolve mainly by mutations  
343 in PFLU0085, which contains an intragenic negative regulator region (Lind, et al.

344 2015), and this is expected to be the fourth most common pathways when present.  
345 Less common promoter mutations will also appear at rates at least a magnitude lower,  
346 but which DGCs that will be transcriptionally activated cannot be easily predicted  
347 except for assuming it will be homologs of the ones used in SBW25. These DGCs  
348 must be catalytically active and also be localized to the membrane (Farr, et al. 2017).  
349 Possibly the subset of DGCs that are primarily activated by mutations to their  
350 promoters is mainly determined by mutation rate and a higher mutation rate might be  
351 caused by higher transcription and also influenced by gene direction (Sankar, et al.  
352 2016). Most promoter capture deletion events are less than 5 kilobases (Lind, et al.  
353 2015) in size and the lack of an alternative promoter relatively close upstream to the  
354 DGC is likely to rule out these DGCs. The DGCs that can be activated by intragenic  
355 activating mutations cannot now be predicted beyond the simple prediction that these  
356 are the same genes as in SBW25 (Lind, et al. 2015).

357

#### 358 **Prediction of mutated genes**

359 In addition to predicting the relative rates of the three main pathways, the previously  
360 described mathematical model can also predict which proteins are likely to be  
361 mutated (Lind, et al. 2019). High rates of WS mutations are predicted for WspF,  
362 WspA, WspE, AwsX and AwsR and MwsR (Figure 2E). A significantly lower rate of  
363 enabling mutations is also predicted to occur in WspC, WspR and AwsO (Figure 2E).  
364 Despite the simplicity of null model it closely predicted the mutational targets in  
365 SBW25 with equal rates for WspF, WspA and WspE and rare mutations in WspC and  
366 WspR, suggesting that it is a useful null model also for other species (Lind, et al.  
367 2019).

368

#### 369 **Prediction of specific mutational targets and effects of mutations**

370 The level of parallelism at the nucleotide level between species is expected to be  
371 dependent both on the number of possible mutations to WS and the degree of  
372 functional conservation of the proteins involved that define the genotype-to-  
373 phenotype map. Mutational hot spots are also expected to contribute to parallelism  
374 when they are conserved, but reduce parallelism when they are not. Based on previous  
375 analysis of patterns of mutations in SBW25 (McDonald, et al. 2009; McDonald, et al.  
376 2011; Lind, et al. 2019) and homology modeling of protein structure using Phyre2

377 (Kelley, et al. 2015) regions expected to be mutated were predicted and the likely  
 378 molecular consequences of different mutations suggested (Figure 4).  
 379

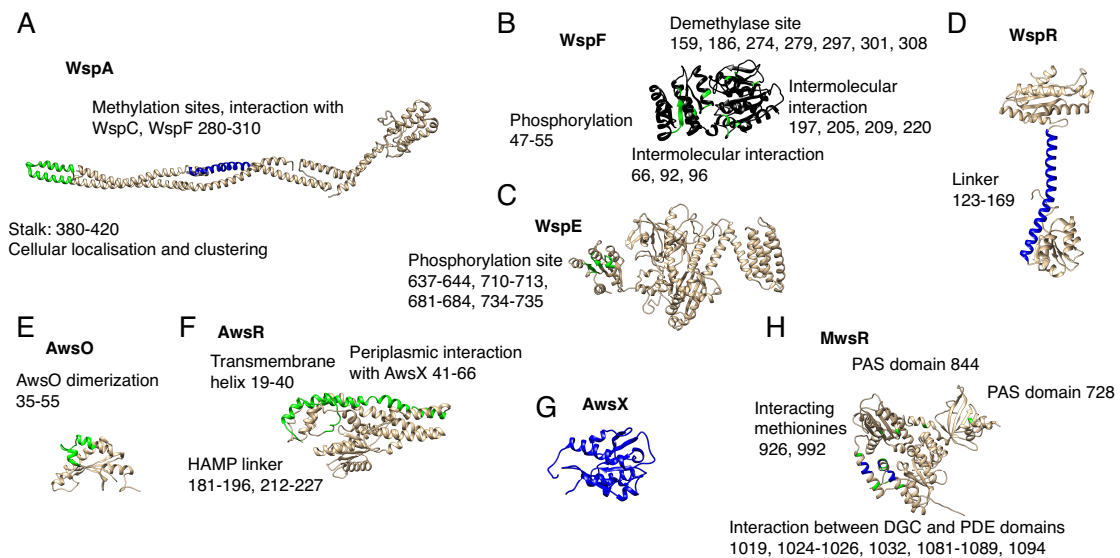

380  
 381 **Figure 4.** Predicted mutational targets and proposed molecular effects. Black  
 382 represents any inactivating mutation including frame shifts, blue represents in frame  
 383 inactivating mutations, green represents amino acid substitutions. Numbers in  
 384 brackets refers to amino acid residue numbers in SBW25 (A) WspA – amino acid  
 385 substitutions are expected at the tip of the stalk and in-frame deletion of methylation  
 386 sites (B) WspF – any inactivating mutation is predicted, amino acid substitutions are  
 387 predicted only in areas where they disrupt intermolecular interactions (C) WspE –  
 388 amino acid substitutions are predicted near the phosphorylation site (D) WspR – small  
 389 in frame deletion and amino acid substitutions in the linker is predicted to cause  
 390 constitutive activation (E) AwsO – amino acid substitutions disrupting AwsO  
 391 dimerization is predicted to lead to increased binding to AwsX without the presence  
 392 of an activating signal (F) AwsR - amino acid substitutions in the periplasmic region  
 393 or transmembrane helix that disrupt the interaction with AwsX or to the HAMP linker  
 394 is predicted (G) AwsX – any inactivating mutation that keep the reading frame intact  
 395 and do not interfere with expression of downstream AwsR is predicted (H) MwsR –  
 396 mutations are predicted in the interface between the DGC and phosphodiesterase  
 397 domains and in the most C-terminal of the PAS domains resulting in constitutive  
 398 activation.

399

400 **Prediction of fitness effects of WS mutations**

401 While conservation of relative fitness of different phenotypic variants might be  
402 expected it is less clear if the relative fitness of different DCG pathways and  
403 mutations will be conserved between species. Despite this difficulty there might be a  
404 way forward to predict the relative fitness of a large range of mutations with limited  
405 experimental data. The distribution of fitness effects of new mutations have been  
406 found to be bimodal for a large number of genes with different functions with one  
407 mode close to neutrality and one corresponding to a complete loss of a particular  
408 molecular function (Jacquier, et al. 2013; Jimenez, et al. 2013; Firnberg, et al. 2014;  
409 Lind, et al. 2017a; Lundin, et al. 2017). Given that mutations that allow colonization  
410 of the air-liquid interface have large phenotypic effects and are believed to also have  
411 large effects on molecular function, often a complete disruption of an interaction,  
412 adaptive mutations in the same region of a protein are likely to have similar fitness  
413 effects. Thus, an approximation of the distribution of fitness effects could be possible  
414 with relative few mutations for each gene. This is supported by the relatively small  
415 number of WS mutants in SBW25 that have been characterized with sensitive fitness  
416 assays and where mutations in the same gene typically have similar fitness effects  
417 (Lind, et al. 2015; Lind, et al. 2019). If this assumption is true the distribution of  
418 beneficial fitness effects is not continuous and the most advantageous mutations are  
419 not predicted to be equally distributed between pathways or genes. Thus the  
420 prediction would be that mutants isolated after experimental evolution were  
421 concentrated to certain genes even if the mutational rate is similar so that although the  
422 prediction from the null model is equal number of mutations for WspA, WspE and  
423 WspF such distribution is unlikely to be found. While the mutation rates to WS for  
424 the three genes are similar in SBW25, WspA mutants are rarely found after  
425 experimental evolution due to their lower fitness (McDonald, et al. 2009; Lind, et al.  
426 2019). There is however no *a priori* reason to expect that the relative fitness of  
427 mutations in different genes or pathways will be conserved between species.

428

429 Inactivating mutations in *fuzY* and *nlpD* producing the alternative adaptive  
430 phenotypes based on LPS modification or cell chaining were also found to have  
431 similar fitness (Ferguson, et al. 2013; Farr 2015). Possibly there are other genes that  
432 can be mutated with similar phenotypes, but that those mutants have lower fitness and  
433 are outcompeted in SBW25. If relative fitness is not conserved between species this

434 could lead to high convergence on the phenotypic level but with completely different  
435 genetic bases.

436

### 437 **Experimental test of forecasts in *Pseudomonas protegens* Pf-5**

438 In order to test the predictions presented above, *P. protegens* Pf-5 was used for a  
439 parallel experimental evolution study under static conditions (Figure 1A). Its genome  
440 encodes homologs of all except one of the DGCs used in SBW25 including all the  
441 three common pathways to WS (Wsp, Aws, Mws). Thus the genetic predictions in  
442 terms of types of mutations and mutated genes are nearly identical to SBW25 and the  
443 mathematical null models can be directly applied. However Pf-5 lacks genes for  
444 biosynthesis of cellulose meaning that if c-di-GMP overproduction is the main  
445 pathway used, as predicted, an alternative EPS component must be utilized. The  
446 experimental conditions were modified to test the robustness of predictions to changes  
447 in media composition, temperature and cell wall material compared to those used in  
448 the original SBW25 system (Materials and Methods). After experimental evolution  
449 for five days, dilutions were spread on agar plates and then screened for colonies with  
450 divergent colony morphology, characteristic of many phenotypes that colonize the air-  
451 liquid interface.

452

### 453 **Genetic pathways**

454 In total 43 independent mutants were isolated and the causal mutations were  
455 identified (Figure 5, Figure 5 – supporting data). As predicted by the null model the  
456 majority (40/43) of mutations were associated with the Wsp, Aws, and Mws pathways  
457 that are subject to negative regulation (Figure 1D). In addition the prediction that  
458 promoter mutations would be the second most common type of mutation was  
459 successful with two mutations found upstream of the *aws* operon, which were  
460 predicted to disrupt the terminator of a high expression ribosomal RNA operon  
461 representing a promoter capture event. Promoter mutations were also found upstream  
462 of PFL\_3078, which is the first gene of a putative EPS locus (PFL\_3078-3093) that  
463 has not previously been described and that is only present in closely related strains.  
464 The operon encodes genes typical of exopolysaccharide biosynthetic operons making  
465 it highly likely it encodes the main structural component used by these mutants.



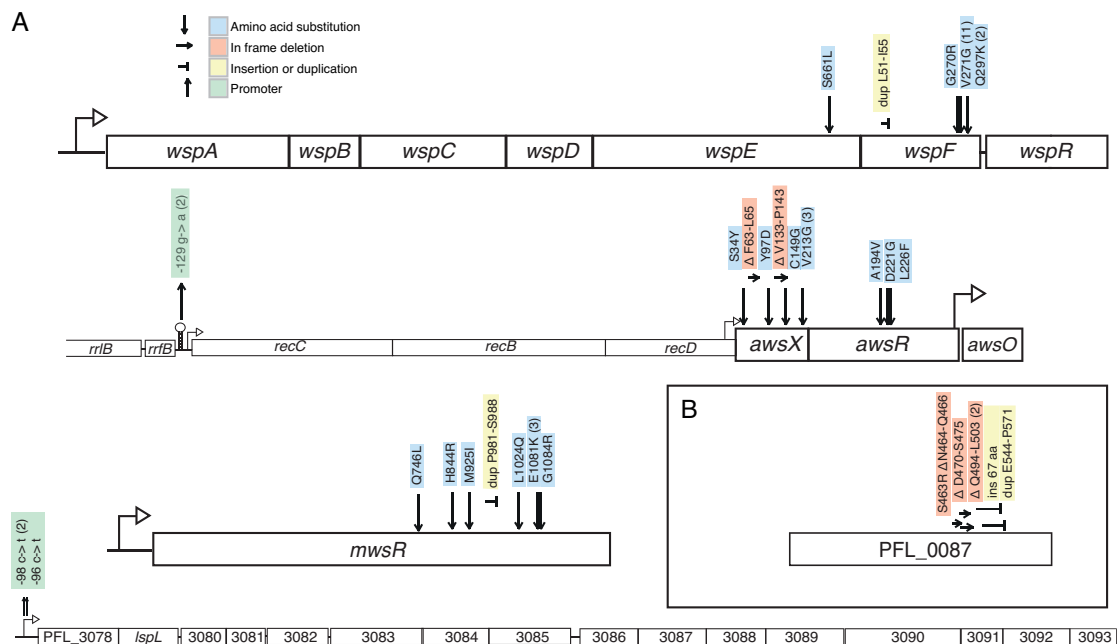

466

467 **Figure 5. A.** 43 independent mutants of wild type *Pseudomonas protegens* Pf-5 were  
 468 isolated after experimental evolution based on their divergent colony morphology and  
 469 mutations were identified in four operons. Numbers in brackets are the number of  
 470 independent mutants found. Details are available in Figure 5 – source data. **B.**

471 Experimental evolution with a  $\Delta wsp \Delta aws \Delta mws$  triple deletion mutant resulted in WS  
 472 types with mutations in the DGC PFL\_0087.

473

474 The mathematical null model (Figure 2E) successfully predicted that of the three  
 475 common pathways to WS, Wsp would be the most common one (16 mutants)  
 476 followed by Aws (14) and then Mws (10). Mutations were predominately found in the  
 477 negative regulators WspF (15 mutants) or AwsX (9), but also in interacting proteins  
 478 WspE (1) and AwsR (3). Given that the mutational target size is estimated to be  
 479 smaller for the interacting proteins (Figure 4) this is not surprising. No mutations  
 480 were found in WspA despite a predicted high rate.

481

482 Mutations were predominantly found in predicted regions (Figure 4) for WspF,  
 483 WspE, AwsX, AwsR and MwsR, but in most cases they were not identical to those in  
 484 SBW25 (Figure 5 – supporting data). A mutational hot spot was apparent in WspF  
 485 with 12 out of 15 mutations being identical V271G missense mutations. The  
 486 previously described mutational hot spots in SBW25 in the *awsX* and *mwsR* genes  
 487 (Lind, et al. 2019) appeared absent, demonstrating how mutation rate differences can

488 skew evolutionary outcomes even for closely related species with similar genetic  
489 architecture.

490

491 To determine if there were also rare pathways to the WS phenotype the entire *wsp*,  
492 *aws*, and *mws* operons were deleted and experimental evolution repeated as was  
493 previously done for SBW25 (Lind, et al. 2015). Mutations in the DGC PFL\_0087  
494 accounted for six out of the seven WS types found (Figure 5B). This was also the  
495 dominant pathway in the SBW25  $\Delta wsp \Delta aws \Delta mws$  strain where mutations in the  
496 corresponding region of PFLU0085 were responsible for 47% of WS mutants. Thus  
497 the fourth most common pathway is also the same for both species.

498

499 Mutations in WspA are predicted to be one of the major mutational routes to WS  
500 based on the mathematical model (Lind, et al. 2019), but no mutations were found  
501 either in this study or in SBW25 (McDonald, et al. 2009). However, when the  
502 mutational spectrum of WS mutants was determined in the absence of selection for  
503 growth at the air-liquid interface, *wspA* mutant occurred at rates similar to those of  
504 WspE and WspF, as predicted by the model, and their low frequency after  
505 experimental evolution could be explained by their lower fitness. To investigate if a  
506 WspA mutation could cause WS in *P. protegens* a common deletion found in SBW25  
507 (WspA T293-E299) was introduced and found to cause a WS phenotype and it is  
508 included in the experiments described below.

509

### 510 **Phenotypic characterization**

511 In total 60 wells were inoculated for the wild type and subjected to experimental  
512 evolution for five days after which air-liquid interface colonization was observed for  
513 the majority of the wells. Mutants with clearly visible changes in colony morphology  
514 were isolated from 43 wells. The experiment was repeated for the  $\Delta wsp \Delta aws \Delta mws$   
515 triple deletion mutant and WS types were detected in 7 wells. Typically a single type  
516 of divergent colonies was observed and one colony for each well was selected for  
517 further characterization at random based on a pre-determined position on the agar  
518 plate. Representative mutations were reconstructed using an allelic exchange protocol  
519 to determine that the mutations are the sole cause of the air-liquid interface  
520 colonization and colony phenotypes and to exclude the influence of secondary  
521 mutations (Figure 6A) before further characterization.

522

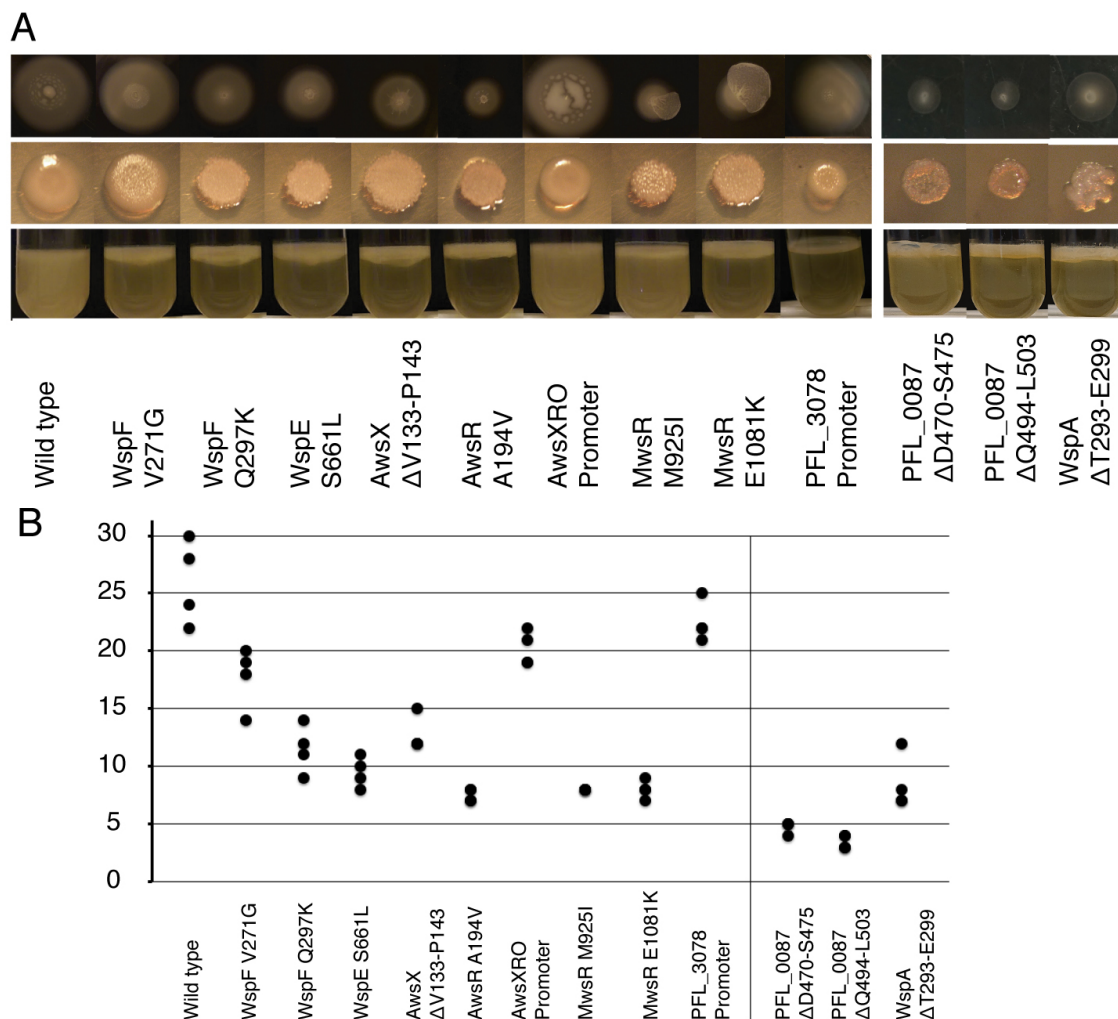

523

524 **Figure 6.** Phenotypic characterization of reconstructed mutants. (A) Motility, colony  
 525 morphology and air-liquid interface colonization (B) Motility assay. As expected if  
 526 the c-di-GMP network is activated motility was reduced for most mutants with the  
 527 exception of PFL\_3078 that is not expected to have increased c-di-GMP levels and  
 528 the AwsXRO promoter capture.

529

530 The lack of cellulose biosynthetic genes also shows that these ecotypes can evolve by  
 531 different phenotypes than in SBW25. Two clearly different phenotypes were observed  
 532 with one very similar to the original WS types in SBW25 with a clear motility defect  
 533 and mutations in the Wsp, Aws, Mws and PFL\_0087 pathways (Figure 6A, 6B). The  
 534 other type was less wrinkly, had similar motility as the wild type and promoter  
 535 mutations upstream of the PFL\_3078-3093 operon (Figure 6A, 6B).

536

537 **Fitness of adaptive mutants**

538 Two types of fitness assays were performed, similarly as previously described (Lind,  
539 et al. 2015), to measure differences in fitness between the different WS mutants and  
540 the alternative phenotypic solution with the mutation upstream of PFL\_3078. The first  
541 assay measures “invasion fitness” where the mutant is allowed to invade a wild type  
542 population from an initial frequency of 1%. This confirms that the mutations are  
543 adaptive and that mutants can colonize the air-liquid interface. The invasion assays  
544 showed that all reconstructed mutants could rapidly invade an ancestral wild type  
545 population (Figure 7A, Figure 7 – source data). Although there were significant  
546 differences between selection coefficients of the mutants (one-way ANOVA  $p <$   
547  $0.0001$ ), no mutant was significantly different from the most common mutant (WspF  
548 V271G, two-tailed  $t$ -test  $p > 0.01$ ).

549

550 The second fitness assay measures “competition fitness” and here each mutant is  
551 instead mixed 1:1 with the most common WS type (WspF V271G) at the start of the  
552 competition. The competition assay showed that the ancestral wild type was rapidly  
553 outcompeted by the mutants also at a 1:1 initial ratio (Figure 7B). There was  
554 significant variation in fitness between the WS mutants (one-way ANOVA  $p <$   
555  $0.0001$ ) and the AwsX had significantly lower selection coefficient (two-tailed  $t$ -test  $p$   
556  $= 0.009$ ) compared to the reference WspF V271G and one of the MwsR mutants  
557 (E1081K) had significantly higher selection coefficient (two-tailed  $t$ -test  $p = 0.001$ ).

558 The alternative phenotypic solution used by the PFL\_3078 promoter mutant resulted  
559 in the lowest fitness ( $s = -0.1$ , two-tailed  $t$ -test  $p < 0.0001$ ) meaning that it is expected  
560 to be rapidly outcompeted by the WS mutants (Figure 7B). The PFL\_0087 mutants  
561 that were only found when the common pathways were deleted had lower fitness  
562 (two-tailed  $t$ -tests  $p = 0.0005$ ,  $p = 0.001$ ) and this was also true for the *wspA* mutant  
563 (two-tailed  $t$ -test  $p = 0.002$ ), which could explain why these were not found in the  
564 wild type population after experimental evolution.

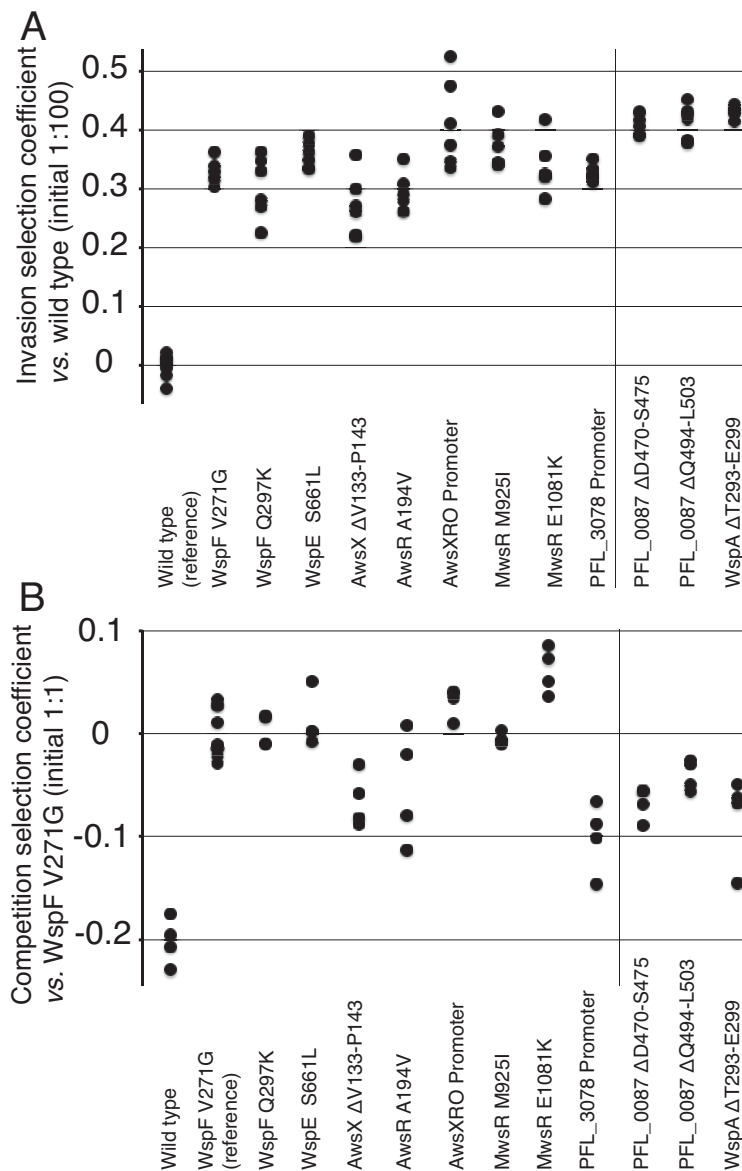

565

566 **Figure 7.** Fitness of reconstructed *P. protegens* Pf-5 WS mutants was measured in  
 567 pairwise competitions. **(A)** Invasion fitness was measured relative a dominant  
 568 ancestral wild type strain with a 1:100 initial ratio to show that mutations were  
 569 adaptive and that they can increase from rare to colonize the air-liquid interface. Six  
 570 independent competitions were performed for each pair. **(B)** Competition fitness was  
 571 measured relative the most common WS mutant (WspF V271G) in a 1:1 initial ratio  
 572 to compare the fitness of different WS mutants and the alternative phenotypic  
 573 solution. Four independent competitions were performed for each pair.

574

### 575 Identification of EPS used for air-liquid colonization

576 SBW25 WS mutants use cellulose as the main structural component, but even though  
 577 there is high parallelism at the genetic level for Pf-5 WS mutants this cannot be the

578 case at the phenotypic level as its genome does not encode genes for cellulose  
579 biosynthesis. Given that production of Pel exopolysaccharide has been shown to be  
580 induced by mutations in *wspF* in *P. aeruginosa* (Hickman, et al. 2005) and that Pel in  
581 this species is required for pellicle formation under static growth (Friedman and  
582 Kolter 2004) this was predicted to be the main structural component used by Pf-5. To  
583 test this prediction the *pel* operon (PFL\_2972-PFL\_2978) was deleted from Pf-5 and  
584 combined with previously characterized WS mutations and fitness was measured.  
585 Both invasion fitness (Figure 8A) and competition fitness (Figure 8B) was  
586 significantly lower (two-tailed t-tests  $p < 0.01$ ) compared to isogenic strains with an  
587 intact *pel* operon (Figure 7A, 7B) except invasion fitness for the AwsX mutant (two-  
588 tailed t-tests  $p = 0.08$ , one outlier). This suggests that Pel polysaccharide serves as an  
589 important structural component for colonizing the air-liquid interface and that its  
590 production is activated by mutations leading to increased c-di-GMP levels. Although  
591 deletion of *pel* in WS mutants resulted in less wrinkly colony morphology it did not  
592 result in a smooth ancestral type. Neither did deletion of *pel* abolish the ability to  
593 colonize the air liquid interface (Figure 8C) or the ability to invade wild type  
594 populations (Figure 8A). This suggests that production of an additional EPS  
595 component is induced by increased c-di-GMP levels caused by mutations in Wsp,  
596 Aws, Mws and PFL\_0087 at least in the absence of *pel*. When the cellulose  
597 biosynthetic operon was deleted from SBW25, typical WS mutations in *wsp*, *aws*, and  
598 *mws* resulted in air-liquid colonization by use of the alternative structural component  
599 encoded by *pgaABCD* and subsequent deletion of the *pgaABCD* operon in these  
600 mutants resulted in a wild type colony morphology (Lind, et al. 2017b). Deletion of  
601 the *pgaABCD* operon (PFL\_0161-PFL\_0164) in Pf-5 strains with deletion of the *pel*  
602 operon combined with WS mutations in either *wspF*, *awsX* and *mwsR* did not result in  
603 a change in colony morphology or loss of ability to colonize the air-liquid interface,  
604 which suggests that PGA is not the secondary structural component used or that yet  
605 another EPS is also produced in response to increased c-di-GMP levels. As expected  
606 if the motility defect observed for WS mutants are primarily caused by high c-di-  
607 GMP levels rather than high production of Pel, the motility was also reduced for Wsp,  
608 Aws and Mws mutants with the *pel* operon deleted (Figure 8D).

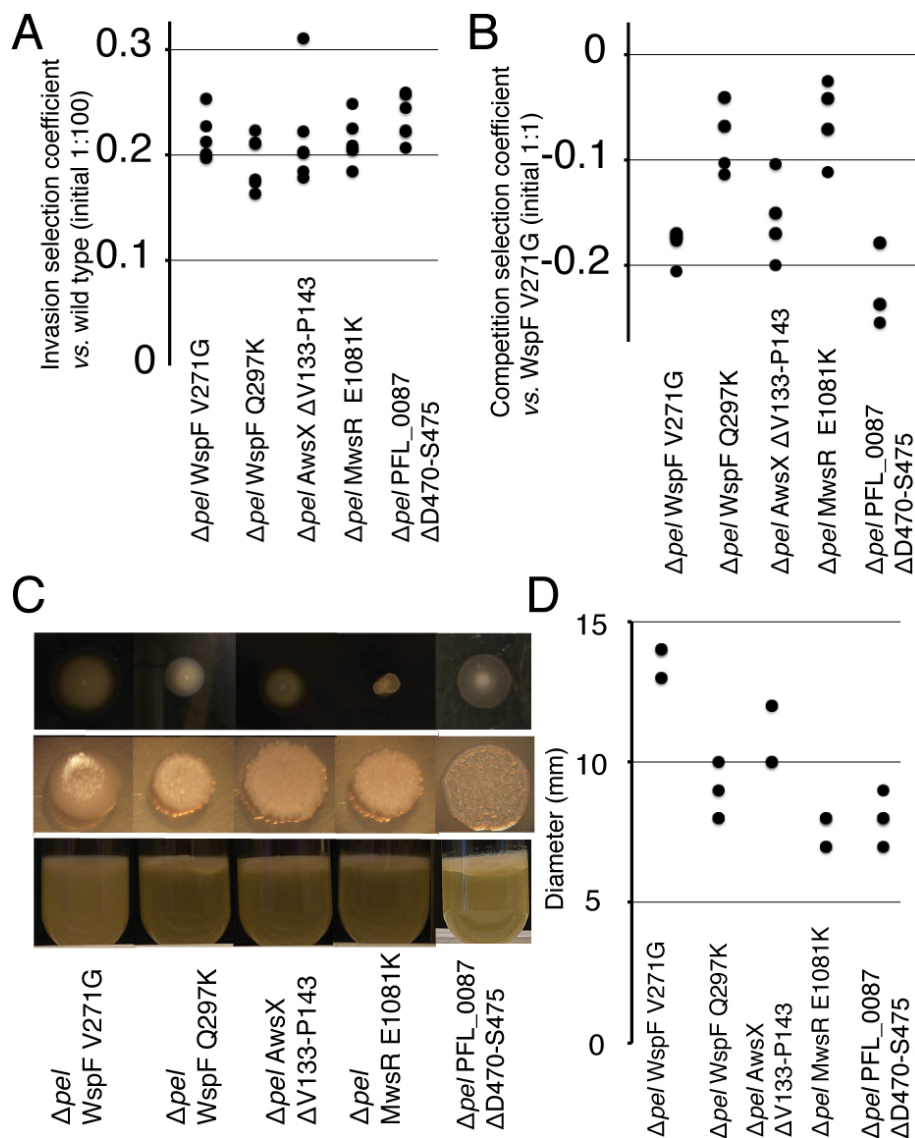

609

610 **Fig 8. Contribution of *pel* to WS phenotype and fitness (A).** Deletion of *pel* in WS  
611 mutants reduces invasion fitness. Fitness of reconstructed *P. protegens* Pf-5 WS  
612 mutants without the *pel* operon was measured in pairwise competitions. Invasion  
613 fitness was measured relative a dominant ancestral wild type strain with a 1:100 initial  
614 ratio. Six independent competitions were performed for each pair. **(B)** Deletion of *pel*  
615 in WS mutants reduces competition fitness. Competition fitness was measured  
616 relative the most common WS mutant (WspF V271G) in a 1:1 initial ratio. Four  
617 independent competitions were performed for each pair. **(C)** Deletion of *pel* in WS  
618 mutants did not result in ancestral smooth colony morphology or loss of ability to  
619 colonize the air-liquid interface suggesting a secondary EPS component is produced.  
620 **(D).** Deletion of *pel* did not restore motility showing that Pel overproduction is not the  
621 cause of the motility defect in WS mutants.

622

## 623 **Discussion**

624 The extension of the *P. fluorescens* SBW25 experimental evolution system to related  
625 species shows promise for true testing of evolutionary forecasting method and  
626 models. While there is a diversity of DGCs and EPSs between species leading to  
627 differences in forecasts, the conserved role of c-di-GMP and limited number of  
628 phenotypes allow the use of previous data to improve predictions and makes the  
629 experimental system robust to changes in environmental conditions. The experimental  
630 test of initial forecasts for *P. protegens* Pf-5 presented here provides support for the  
631 ability to predict some aspects of both genetic and phenotypic evolution while  
632 recognizing that the probability of specific mutations cannot in most cases be  
633 predicted.

634

635 That experimental populations of *Pseudomonas* will colonize the air-liquid interface  
636 when incubated under static condition is a prerequisite of extending the model. Given  
637 that a range of phenotypic solutions is predicted to be available for all species the  
638 evolution of such mutants for *P. protegens* is not surprising. The specific  
639 environmental conditions used for experimental evolution often have a major impact  
640 on evolutionary outcomes and is also likely to influence relative fitness and possibly  
641 mutational biases also in the WS system. However despite major changes in growth  
642 medium, temperature and material and physical dimensions of the growth vessel,  
643 predictions on both the genetic and phenotypic levels proved successful  
644 demonstrating robustness to environmental change and the establishment of a  
645 dominant selective pressure, i.e. access to oxygen solved by air-liquid interface  
646 colonization.

647

648 Phenotypic predictions of the structural basis supporting air-liquid colonization is  
649 challenging given the limited previous experimental data. For SBW25 cellulose-based  
650 solutions are superior in fitness, but for Pf-5 this solution is not available. The  
651 prediction that overproduction of structural exopolysaccharides, rather than fuzzy,  
652 cell-chaining or mucoid types, would be the primary solution was successful. One of  
653 the two phenotypes found here used the Pel EPS, which could be predicted based on  
654 its role in *P. aeruginosa*. However it appears to use a secondary EPS as well, that  
655 remains to be identified, given that mutants lacking Pel but with activated DGCs still



656 colonize the air-liquid interface and have a distinct colony morphology. The second  
657 phenotype used another EPS, encoded by PFL\_3078-3093, which had not previously  
658 be described and given that several EPS loci are usually encoded in *Pseudomonas*  
659 genomes its use could not be predicted. However, repeating experimental evolution  
660 using other *Pseudomonas* species is likely to provide more information about which  
661 EPSs can be used to colonize the air-liquid interface and their relative fitness to allow  
662 improved phenotypic predictions. Deletion of the *pel* operon, the unidentified  
663 secondary EPS and PFL\_3078-3093 and subsequent experimental evolution could  
664 reveal less fit phenotypic solutions that are expected to exist including fuzzy types  
665 caused by defects in LPS modification, cell-chaining types with defects in cell  
666 division, adhesive proteins or mucoid types using alginate or levan, two EPSs with  
667 lower structural stability.

668

669 The general prediction of types of mutations, as described in the hierarchy in Figure  
670 2D, was also successful although the relatively few mutants identified here did not  
671 allow for detection of rare activating mutations or double inactivating mutations. The  
672 majority of mutations were loss-of-function mutations in negative regulators or  
673 interacting proteins followed by less common promoter mutations and promoter  
674 captures. In contrast to SBW25, where all promoter mutations resulted in up-  
675 regulation of DGCs, the mutation upstream of PFL3078-3093 demonstrates the  
676 possibility of direct transcriptional activation of EPS components that are not under  
677 post-translational control of c-di-GMP. Two identical mutations were found over 9 kb  
678 upstream of the *aws* operon, in between a ribosomal RNA operon and the *recCBD*  
679 operon, which encodes key genes for recombination. The molecular effects of these  
680 mutations have not been further investigated, but the resulting WS phenotype is  
681 dependent of the presence of the *aws* operon, deletion of which reversed the  
682 phenotype. This is consistent with an up-regulation of c-di-GMP by AwsR  
683 presumably caused by increased transcription. The mutation is located in the  
684 predicted terminator of the ribosomal RNA operon and increased transcriptional read-  
685 through could put the *aws* operon under control of a very strong *rnn* promoter that is  
686 most highly transcribed during exponential growth. This could explain the relatively  
687 mild colony morphology phenotype as well as high motility of this WS mutant  
688 (Figure 6).

689

690 A mathematical null model that incorporates information about the Wsp, Aws and  
691 Mws molecular networks (Null model IV in (Lind, et al. 2019)) successfully predicted  
692 that Wsp would be the most commonly used pathway followed by Aws, and Mws the  
693 most rare. However, the number of mutants isolated here is rather small and the high  
694 frequency of Wsp mutants seems mainly to be caused by a mutational hot spot in  
695 *wspF*. Still the prediction that the three pathways together would contribute the large  
696 majority of adaptive mutations (40 out of 43) is not trivial given that in SBW25 at  
697 least 13 additional pathways are available to the high fitness WS phenotype (Lind, et  
698 al. 2015). It is also worth noting that direct use of mutation rate data from SBW25  
699 (Lind, et al. 2019) would result in poorer predictions than the mathematical null  
700 model due to a strong mutational hot spot in *awsX* in that species. In addition the  
701 fourth most common pathway to WS, PFL\_0087, could be predicted based on data  
702 from SBW25.

703

704 For the multi-protein pathways Wsp and Aws, the mathematical model (Lind, et al.  
705 2019) predicted (Figure 2E) that mutations would primarily be found in WspA,  
706 WspE, WspF, AwsX and AwsR. Mutations were detected in all these except in WspA  
707 and the majority was found in the negative regulators WspF and AwsX. WspA  
708 mutations were not found in the original study in SBW25 either (McDonald, et al.  
709 2009), but this was shown to be due to lower fitness relative WspF and WspE mutants  
710 rather than a lower mutation rate to WS (Lind, et al. 2019). This is also a likely  
711 explanation for the absence of WspA mutants here as well (Figure 7B), but it is not  
712 clear if this fitness difference would be conserved in other species or if sometimes  
713 WspA mutants are more fit. Thus the null model prediction of equal rates for WspA,  
714 WspF and WspE is not changed for future experimental tests. Direct comparison  
715 between competitive fitness of mutants in SBW25 and Pf-5 is not possible as it was  
716 measured under different experimental conditions, against different reference mutants  
717 and in most cases the mutations are not identical. However it is interesting to note that  
718 for both species high fitness WS types have mutations in the same proteins (WspF,  
719 WspE, MwsR) and low fitness WS types also appear in the same proteins (WspA,  
720 AwsX, AwsO, PFLU0085/PFL\_0087).

721

722 The molecular effects of the mutations found here are unknown, but knowledge from  
723 SBW25 and *P. aeruginosa* and their positions in protein structure allowed some

724 predictions to be made. Inactivating mutations in the negative regulator WspF were  
725 predicted to be either indels or missense mutations in four specific regions. Mutations  
726 were found in two of the predicted regions, one in the vicinity to the methylesterase  
727 active site where mutations are predicted to cause large disruptions in protein  
728 structure and the other one directly disrupting the phosphorylation active site in the  
729 signal receiver domain. No mutations were found in the surface exposed regions  
730 hypothesized to be involved in interactions with WspA and WspE, which could be  
731 due to differences in function between SBW25 and Pf-5 or simply that they appear at  
732 lower frequency and would be detected if additional mutations were isolated. The sole  
733 mutation in WspE is, as predicted, located in the direct vicinity of the phosphorylation  
734 active site. Mutations in AwsX were amino acid substitutions throughout the gene as  
735 well as in frame deletions inactivating the gene as predicted. Mutations in AwsR and  
736 MwsR were also found in predicted regions, but no mutations were found in the small  
737 periplasmic region of AwsR, which is the most commonly targeted region in SBW25.  
738 Known mutational hot spots in *awsX*, *awsR* and *mwsR* in SBW25 (Lind, et al. 2019)  
739 were not conserved in Pf-5 resulting in divergent spectra of mutations, while mutated  
740 regions and predicted functional effects remain conserved between the two species.  
741 Little is known about the molecular function of the putative DGC encoded by  
742 PFL\_0087/PFLU0085, but it is clear that a multitude of amino acid substitutions,  
743 deletions and insertions in a more than 40 amino acids long region can lead to WS  
744 (Lind, et al. 2015). Thus it functions as a small intragenic negative regulator region  
745 that might be involved in oligomerization and loss of this interaction results in  
746 constitutive activation of c-di-GMP production.

747

748 The diversity of phenotypic solutions observed after experimental evolution is  
749 dependent on fitness differences between the phenotypes, but also on the rate of  
750 which phenotypes are introduced by mutations, which is dependent on the genetic  
751 architecture underlying the trait as well as mutational biases. The Pf-5 strain has at  
752 least three DGC pathways (Wsp, Aws and Mws) that are subject to negative  
753 regulation leading to prediction of a high rate of WS mutants, which are then expected  
754 to outcompete other phenotypic solutions. If instead only one of these pathways were  
755 present, a larger diversity of phenotypes would be expected to be observed with  
756 relative fitness becoming less important as the first mutant that gains a foothold at the

757 air-liquid interface will have a large advantage and priority effects, i.e. being first,  
758 will increasingly determine which adaptive mutants are observed.

759

760 Given that the mutational target upstream of PFL\_3078-3093 is likely be relatively  
761 small and that these mutants are rapidly outcompeted by all WS types tested, their  
762 relatively high frequency (3/43) is unexpected. Possibly this is due to a higher  
763 mutation rate at these sites (Sankar, et al. 2016) or that population structure limits  
764 direct competition between these different phenotypes and reduces the importance of  
765 relative fitness. In SBW25 low fitness phenotypes that colonize the air-liquid  
766 interface based on LPS modification or cell-chaining are observed prior to the rise of  
767 WS to high frequencies (Lind, et al. 2017b) due to the presence of mutational hot  
768 spots in these genes which make these mutants appear early during the growth phase  
769 despite their relatively small mutational targets (Ferguson, et al. 2013; Farr 2015;  
770 Lind, et al. 2017b).

771

772 In partially predicting evolutionary outcomes in *P. protegens*, this work lays the  
773 foundation for future tests of evolutionary forecasting in related *Pseudomonas* species  
774 by clearly stating predictions on several different levels from phenotype down to  
775 which specific regions of proteins are likely to be mutated. Given what is already  
776 known about the effects of (for now) unpredictable mutational biases and differences  
777 in fitness between different WS types many of the forecasts will inevitably fail.  
778 However hopefully they will fail in interesting ways thereby revealing erroneous  
779 assumptions. The ability to remove common genetic and phenotypic pathways  
780 provides a unique opportunity to also find those pathways that evolution does not  
781 commonly use. This is necessary to determine why forecasts fail and update the  
782 predictive models for another cycle of prediction, experimental evolution and mutant  
783 characterization that make it possible to use this iterative model to define the  
784 information necessary to predict short-term evolutionary processes.

785

## 786 **Materials and methods**

787

### 788 **Strains and media**

789 *Pseudomonas protegens* Pf-5 (previously known as *P. fluorescens* Pf-5) and  
790 derivatives thereof were used for all experimental evolution and phenotypic  
791 characterization. *E. coli* DH5 $\alpha$  was used for cloning PCR fragments for genetic  
792 engineering (Paulsen et al). *P. protegens* Pf-5 was grown in tryptic soy broth  
793 (Tryptone 17g, Soytone 3g, Glucose 2.5g, NaCl 5g, K<sub>2</sub>HPO<sub>4</sub> 2.5g per liter)  
794 supplemented with 10 mM MgSO<sub>4</sub> and 0.2% glycerol (TSBGM) for experimental  
795 evolution and fitness assays. Lysogeny broth (LB) was used during genetic  
796 engineering and LB without NaCl and supplemented with 8% sucrose was used for  
797 counter-selection of *sacB* marker. Solid media were 1.5% agar added to LB or TSB  
798 supplemented with 10 mM MgSO<sub>4</sub>, 0.2% glycerol and 10 mg/l Congo red. Motility  
799 assays were conducted in 0.3% agar TSB supplemented with 10 mM MgSO<sub>4</sub>, 0.2%  
800 glycerol. Kanamycin was used at 50 mg/l for *E. coli* or 80 mg/l for *P. protegens* and  
801 gentamicin at 10 mg/l for *E. coli* or 15 mg/L for *P. protegens*. Selection plates for  
802 cloning contained 5-Bromo-4-Chloro-3-Indolyl  $\beta$ -D-Galactopyranoside (X-gal) at 40  
803 mg/l. 100 mg/L nitrofurantoin was used to inhibit growth of *E. coli* donor cells after  
804 conjugation. All strains were stored at -80°C in LB with 10% DMSO.

805

### 806 **Experimental evolution**

807 30 central wells of a deep well plate (polypropylene, 1.1 mL, round walls, Axygen  
808 Corning Life Sciences) were inoculated with approximately 10<sup>3</sup> cells each and  
809 incubated at 36°C for 5 days without shaking on two different occasions. Suitable  
810 dilutions were plated on TSBGM plates with Congo red after 5 days and incubated at  
811 36°C for 48 h. Plates were screened for colonies with a visible difference in colony  
812 morphology and one divergent colony per well were randomly selected based only on  
813 its position on the agar plate. In total 43 independent mutants were streaked for single  
814 cells twice before overnight growth in LB and freezing. An identical protocol was  
815 used for the  $\Delta$ *wsp*  $\Delta$ *aws*  $\Delta$ *mws* strain.

816

### 817 **Genome sequencing**

818 Seven mutant strains that did not contain mutations in the *wspF* and *awsX* genes were  
819 analyzed by genome resequencing. The strains had mutations in *awsR*, *mwsR*, *wspE*,  
820 upstream PFL\_3078 (2 strains) and in the intergenic region between *rrfB* and *recC*  
821 upstream of the *awsXRO* operon. Genomic DNA was isolated with Genomic DNA

822 Purification Kit (Thermo Fisher). Sequencing libraries were prepared from 1µg DNA  
823 using the TruSeq PCRfree DNA sample preparation kit (cat# FC- 121-3001/3002,  
824 Illumina Inc.) targeting an insert size of 350bp. The library preparation was  
825 performed according to the manufacturers' instructions (guide#15036187).  
826 Sequencing was performed with MiSeq (Illumina Inc.) paired-end 300bp read length  
827 and v3 sequencing chemistry.

828

829 Sequencing was performed by the SNP&SEQ Technology Platform in Uppsala. The  
830 facility is part of the National Genomics Infrastructure (NGI) Sweden and Science for  
831 Life Laboratory. The SNP&SEQ Platform is also supported by the Swedish Research  
832 Council and the Knut and Alice Wallenberg Foundation. Sequencing data were  
833 analyzed with using Geneious v. 10.2.3 with reads assembled against the *P. protegens*  
834 Pf-5 genome sequence (CP000076.1).

835

### 836 **Sanger sequencing**

837 Sanger sequencing were performed by GATC biotech and used to sequence candidate  
838 genes to find adaptive mutations and to confirm reconstructed mutations. Primer  
839 sequences are available in Table S1.

840

### 841 **Reconstruction of mutations**

842 Thirteen mutations representing all candidate genes found using Sanger or Illumina  
843 sequencing as well as PFL\_0087 and WspA mutations were reconstructed in the wild  
844 type ancestral *P. protegens* Pf-5 to show that they are the cause of the adaptive  
845 phenotype and to be able to assay their fitness effects without the risk of secondary  
846 mutations that might have occurred during experimental evolution. A two-step allelic  
847 replacement protocol was using to transfer the mutation into the ancestor. First a 1-2  
848 kb fragment surrounding the putative adaptive mutations were amplified using PCR  
849 (Phusion High- Fidelity DNA polymerase, Thermo Scientific) and ligated into the  
850 multiple cloning site of the mobilizable pK18mobsac suicide plasmid (FJ437239)  
851 using standard molecular techniques. The ligation mix was then transformed into  
852 competent *E. coli* DH5a using heat shock. After confirmation of correct insert size by  
853 PCR the plasmid was transferred to *P. protegens* Pf-5 by conjugation with the donor  
854 strain and an *E. coli* strain carrying the conjugation helper plasmid pRK2013.  
855 Cultures were grown overnight of the recipient *P. protegens* Pf-5 (20 ml per

856 conjugation at 30°C in LB) and 2 ml each of the donor and helper *E. coli* strains per  
857 conjugation at 37°C in LB with kanamycin. The culture of *P. protegens* Pf-5 was heat  
858 shocked for 10 minutes at 42°C prior to centrifugation at 4000 rpm for 10 minutes  
859 and resuspension in a small volume of LB. Donor and helper cells were collected by  
860 centrifugation 4000 rpm for 10 minutes, resuspended in LB, and mixed with the  
861 concentrated recipient cells. After another round of centrifugation the conjugation mix  
862 was resuspended in 50 µl LB and spread onto several spots on a LA plate followed by  
863 incubation overnight at 30°C. Each spot of the conjugation mix was scraped of the  
864 plate and resuspended in 200 µl LB each and plated on LA plates with kanamycin, to  
865 select for transfer of the plasmid, and nitrofurantoin that prevents growth of the *E.*  
866 *coli* donor and helper cells. The pK18mobsac plasmid has a pBR322 type origin and  
867 cannot replicate in *P. protegens* Pf-5 and only cells where the plasmid has integrated  
868 into the chromosome by homologous recombination, with the homology provided by  
869 the cloned fragment, can grow in the presence of kanamycin. After streaking for  
870 single cells on LA plates with kanamycin, the *P. protegens* Pf-5 strains with  
871 integrated plasmids were grown overnight in LB at 30°C without antibiotics to allow  
872 for double crossover homologous recombination resulting in loss of the integrated  
873 plasmid. The plasmid also contains the *sacB* marker conferring sucrose sensitivity,  
874 which allows for counter-selection by plating on LA plates with sucrose. Sucrose  
875 resistant colonies were checked for loss of the kanamycin marker and DNA  
876 sequencing of the cloned region to find strains with the reconstructed mutation and no  
877 other mutations.

878 Deletion of the *wsp*, *aws*, *mws* and *pelABCDEFG* (PFL\_2972-PFL\_2978) regions was  
879 accomplished using the same two-step allelic exchange protocol using SOE-PCR to  
880 generate a fragment surrounding the operon as previously described (Ferguson, et  
881 al. 2013; Farr 2015; Lind, et al. 2017b). Gene synthesis (Thermo Fisher) was used to  
882 make DNA fragments used for deletion of PFL\_0161-PFL\_0164 and WspA T293-  
883 E299. Primer sequences are available in Table S1.

884

#### 885 **Fitness assays**

886 Two types of competition fitness assays were performed similarly to previously  
887 described (Lind, et al. 2015). The first assay measures invasion fitness, where a  
888 mutant is mixed 1:100 with the wild type ancestor, simulating early stages of air-

889 liquid interface colonization where a rare mutant establishes and grows at the surface  
890 with no competition from other mutants. The second assay instead measures  
891 competition fitness in a 1:1 competition against a reference mutant strain, which here  
892 was chosen to be the WspF V271G mutant because it was the most commonly found  
893 in the experimental evolution study and thus is highly successful either because of a  
894 high rate of emergence, i.e. a mutational hot spot, or higher fitness than most other  
895 WS mutants. In addition, the WspF V271G mutant has a temperature sensitive colony  
896 morphology phenotype in that it is highly wrinkly at 30°C, but only have a very mild  
897 phenotype when grown at room temperature, thus allowing it to be distinguishable  
898 from both the smooth ancestor and all other wrinkly mutants isolated here.

899

900 Fluorescent reference strains of the wild type ancestor and the WspF V271G mutants  
901 were created using a miniTn7 transposon (miniTn7(Gm) PA1/04/03 Gfp.AAV-a)  
902 (Lambertsen, et al. 2004) that allows integration at a defined locus (attTn7) in the  
903 chromosome. This allows the colonies to be distinguished not only by morphology  
904 but also by fluorescence under blue/UV light and gentamicin resistance, which  
905 provides a way to ascertain that secondary adaptive mutants that might occur during  
906 the competition experiment do not bias the results (for example the ancestor could  
907 evolve WS types or a WS mutant can evolve to cheat on the other type by inactivation  
908 of EPS production or reduced c-di-GMP signalling). Introduction of the transposon  
909 into *P. protegens* Pf-5 was performed by tri-parental conjugation from *E. coli* with  
910 helper plasmids pRK2013 (conjugation helper) and pUX-BF13 containing the  
911 transposase genes) using the same conjugation protocol described above.

912

913 The invasion assay was performed by mixing shaken overnight cultures of the  
914 competitor 1:100 with the GFP-labeled reference ancestor followed by 1000-fold  
915 dilution and static incubation at 36°C for 48 h in TSBGM medium in deep well plates  
916 (1 ml per well, using only the central 60 wells). For the competition assay, the GFP-  
917 labeled reference strain WspF 271G was mixed 1:1 with the competitor and diluted 6-  
918 fold and grown for 4 h (shaken at 30°C), before plating to determine initial ratios, to  
919 ensure the cells were in a similar physiological state at the start of the competition.

920 The competition cultures were then diluted 1000-fold in TSBGM medium and grown  
921 in deep well plates (1 ml per well, using only the central 60 wells) static for 24 h at



922 36°C. Selection coefficients ( $s$ ) were calculated as previously described (Dykhuizen  
923 1990), where  $s = 0$  is equal fitness, positive is increased fitness and negative is  
924 decreased fitness relative to the reference strain. Briefly  $s$  is calculated as the change  
925 in logarithmic ratio over time according to  $s = [\ln(R(t)/R(0))]/[t]$ , where  $R$  is the ratio  
926 of mutant to reference and  $t$  is the number of generations of the entire population  
927 during the experiment (estimated from viable counts). The cost of the fluorescent  
928 marker were calculated from control competitions where the GFP-labeled reference  
929 strains (wild type and WspF V271G) were competed against isogenic strains without  
930 the marker and included in each plate under identical conditions during the fitness  
931 assays and used to adjust the selection coefficients to compensate for the cost.

932

### 933 **Motility assays**

934 Swimming motility assays were performed in TSBGM plates with 0.3% agar (BD)  
935 and the diameter was measured after 24 h of growth at room temperature. Each strain  
936 was assayed in duplicates on two different plates.

937

### 938 **Bioinformatics analysis of DGCs and EPS genes**

939 Homologs for all DGCs in *P. fluorescens* SBW25 were found using the *Pseudomonas*  
940 Ortholog Database at Pseudomonas.com (Winsor, et al. 2016). Blast-p searches for  
941 GGDEF domains were performed to find remaining DGCs in the six *Pseudomonas*  
942 species and their homologs again found using the *Pseudomonas* Ortholog Database  
943 (Whiteside, et al. 2013) and manually inspected. Annotations (Pseudomonas.com. DB  
944 version 17.2) were also searched for diguanylate cyclase and GGDEF. Not all DCCs  
945 found are likely to have diguanylate cyclase activity, but given the difficulties of  
946 predicting which of the partly degenerate active sites are likely to be inactive  
947 combined with the possibilities of mutational activation during experimental  
948 evolution, none were excluded.

949

950 There is no simple way to find all genes that can function as structural or regulatory  
951 genes to allow colonization of the air-liquid interface. Thus the selection in Figure 3B  
952 and Figure 3 – source data should not be considered complete. Putative EPS genes  
953 were found using blastp searches with sequences from known exopolysaccharide  
954 biosynthesis proteins including cellulose, PGA, Pel, Psl, Pea, Peb, alginate and levan.  
955 Homologs were then found using the *Pseudomonas* Ortholog Database (Whiteside, et

956 al. 2013) at Pseudomonas.com (Winsor, et al. 2016). Annotations (Pseudomonas.com.  
957 DB version 17.2) were also searched for glycosyltransferase, glycosyl transferase,  
958 flippase, polysaccharide, lipopolysaccharide, polymerase, biofilm, adhesion and  
959 adhesion. Based on previous work in SBW25 and literature searches a few additional  
960 genes were added.

961

## 962 **Acknowledgements**

963 This work was supported by grants from Carl Tryggers Foundation for Scientific  
964 Research and Magnus Bergvalls Foundation.

965

## 966 **Competing interests**

967 The author declares no competing interests.

## 968 **References**

969

970 Bantinaki E, Kassen R, Knight CG, Robinson Z, Spiers AJ, Rainey PB. 2007.

971 Adaptive divergence in experimental populations of *Pseudomonas fluorescens*. III.

972 Mutational origins of wrinkly spreader diversity. *Genetics* 176:441-453.

973 <http://dx.doi.org/10.1534/genetics.106.069906>

974 Barrick JE, Lenski RE. 2013. Genome dynamics during experimental evolution.

975 *Nature reviews. Genetics* 14:827-839. <http://dx.doi.org/10.1038/nrg3564>

976 Barrick JE, Yu DS, Yoon SH, Jeong H, Oh TK, Schneider D, Lenski RE, Kim JF.

977 2009. Genome evolution and adaptation in a long-term experiment with *Escherichia*

978 *coli*. *Nature* 461:1243-1247. <http://dx.doi.org/10.1038/nature08480>

979 Beaumont HJ, Gallie J, Kost C, Ferguson GC, Rainey PB. 2009. Experimental

980 evolution of bet hedging. *Nature* 462:90-93. <http://dx.doi.org/10.1038/nature08504>

981 Blank D, Wolf L, Ackermann M, Silander OK. 2014. The predictability of molecular

982 evolution during functional innovation. *Proceedings of the National Academy of*

- 983 Sciences of the United States of America 111:3044-3049.
- 984 <http://dx.doi.org/10.1073/pnas.1318797111>
- 985 Blount ZD, Lenski RE, Losos JB. 2018. Contingency and determinism in evolution:  
986 Replaying life's tape. *Science* 362. <http://dx.doi.org/10.1126/science.aam5979>
- 987 Brandis G, Pietsch F, Alemayehu R, Hughes D. 2015. Comprehensive phenotypic  
988 characterization of rifampicin resistance mutations in *Salmonella* provides insight into  
989 the evolution of resistance in *Mycobacterium tuberculosis*. *J Antimicrob Chemother*  
990 70:680-685. <http://dx.doi.org/10.1093/jac/dku434>
- 991 Conrad TM, Joyce AR, Applebee MK, Barrett CL, Xie B, Gao Y, Palsson BO. 2009.  
992 Whole-genome resequencing of *Escherichia coli* K-12 MG1655 undergoing short-  
993 term laboratory evolution in lactate minimal media reveals flexible selection of  
994 adaptive mutations. *Genome biology* 10:R118. [http://dx.doi.org/10.1186/gb-2009-10-](http://dx.doi.org/10.1186/gb-2009-10-10-r118)  
995 10-r118
- 996 Deatherage DE, Kepner JL, Bennett AF, Lenski RE, Barrick JE. 2017. Specificity of  
997 genome evolution in experimental populations of *Escherichia coli* evolved at different  
998 temperatures. *Proceedings of the National Academy of Sciences of the United States*  
999 of America 114:E1904-E1912. <http://dx.doi.org/10.1073/pnas.1616132114>
- 1000 Dykhuizen DE. 1990. Experimental studies of natural selection in bacteria. *Annu.*  
1001 *Rev. Ecol. Syst.* 21:373-398.
- 1002 Farr AD. 2015. Formalist features determining the tempo and mode of evolution in  
1003 *Pseudomonas fluorescens* SBW25. [[Auckland, New Zealand]: Massey University.
- 1004 Farr AD, Remigi P, Rainey PB. 2017. Adaptive evolution by spontaneous domain  
1005 fusion and protein relocalization. *Nat Ecol Evol* 1:1562-1568.  
1006 <http://dx.doi.org/10.1038/s41559-017-0283-7>

- 1007 Ferguson GC, Bertels F, Rainey PB. 2013. Adaptive Divergence in Experimental  
1008 Populations of *Pseudomonas fluorescens*. V. Insight into the Niche Specialist "Fuzzy  
1009 Spreader" Compels Revision of the Model Pseudomonas Radiation. *Genetics*.  
1010 <http://dx.doi.org/10.1534/genetics.113.154948>
- 1011 Firnberg E, Labonte JW, Gray JJ, Ostermeier M. 2014. A comprehensive, high-  
1012 resolution map of a gene's fitness landscape. *Molecular biology and evolution*  
1013 31:1581-1592. <http://dx.doi.org/10.1093/molbev/msu081>
- 1014 Fraebel DT, Mickalide H, Schnitkey D, Merritt J, Kuhlman TE, Kuehn S. 2017.  
1015 Environment determines evolutionary trajectory in a constrained phenotypic space.  
1016 *Elife* 6. <http://dx.doi.org/10.7554/eLife.24669>
- 1017 Friedman L, Kolter R. 2004. Genes involved in matrix formation in *Pseudomonas*  
1018 *aeruginosa* PA14 biofilms. *Mol Microbiol* 51:675-690.
- 1019 Gallie J, Libby E, Bertels F, Remigi P, Jendresen CB, Ferguson GC, Desprat N,  
1020 Buffing MF, Sauer U, Beaumont HJ, et al. 2015. Bistability in a metabolic network  
1021 underpins the de novo evolution of colony switching in *Pseudomonas fluorescens*.  
1022 *PLoS biology* 13:e1002109. <http://dx.doi.org/10.1371/journal.pbio.1002109>
- 1023 Goymer P, Kahn SG, Malone JG, Gehrig SM, Spiers AJ, Rainey PB. 2006. Adaptive  
1024 divergence in experimental populations of *Pseudomonas fluorescens*. II. Role of the  
1025 GGDEF regulator WspR in evolution and development of the wrinkly spreader  
1026 phenotype. *Genetics* 173:515-526. <http://dx.doi.org/10.1534/genetics.106.055863>
- 1027 Herron MD, Doebeli M. 2013. Parallel evolutionary dynamics of adaptive  
1028 diversification in *Escherichia coli*. *PLoS biology* 11:e1001490.  
1029 <http://dx.doi.org/10.1371/journal.pbio.1001490>
- 1030 Hickman JW, Tifrea DF, Harwood CS. 2005. A chemosensory system that regulates  
1031 biofilm formation through modulation of cyclic diguanylate levels. *Proceedings of the*

- 1032 National Academy of Sciences of the United States of America 102:14422-14427.  
1033 <http://dx.doi.org/10.1073/pnas.0507170102>
- 1034 Jacquier H, Birgy A, Le Nagard H, Mechulam Y, Schmitt E, Glodt J, Bercot B, Petit  
1035 E, Poulain J, Barnaud G, et al. 2013. Capturing the mutational landscape of the beta-  
1036 lactamase TEM-1. Proceedings of the National Academy of Sciences of the United  
1037 States of America 110:13067-13072. <http://dx.doi.org/10.1073/pnas.1215206110>
- 1038 Jahn LJ, Munck C, Ellabaan MMH, Sommer MOA. 2017. Adaptive Laboratory  
1039 Evolution of Antibiotic Resistance Using Different Selection Regimes Lead to  
1040 Similar Phenotypes and Genotypes. Front Microbiol 8:816.  
1041 <http://dx.doi.org/10.3389/fmicb.2017.00816>
- 1042 Jerison ER, Desai MM. 2015. Genomic investigations of evolutionary dynamics and  
1043 epistasis in microbial evolution experiments. Curr Opin Genet Dev 35:33-39.  
1044 <http://dx.doi.org/10.1016/j.gde.2015.08.008>
- 1045 Jimenez JI, Xulvi-Brunet R, Campbell GW, Turk-MacLeod R, Chen IA. 2013.  
1046 Comprehensive experimental fitness landscape and evolutionary network for small  
1047 RNA. Proceedings of the National Academy of Sciences of the United States of  
1048 America 110:14984-14989. <http://dx.doi.org/10.1073/pnas.1307604110>
- 1049 Kelley LA, Mezulis S, Yates CM, Wass MN, Sternberg MJ. 2015. The Phyre2 web  
1050 portal for protein modeling, prediction and analysis. Nature protocols 10:845-858.  
1051 <http://dx.doi.org/10.1038/nprot.2015.053>
- 1052 Kishimoto T, Iijima L, Tatsumi M, Ono N, Oyake A, Hashimoto T, Matsuo M,  
1053 Okubo M, Suzuki S, Mori K, et al. 2010. Transition from positive to neutral in  
1054 mutation fixation along with continuing rising fitness in thermal adaptive evolution.  
1055 PLoS genetics 6:e1001164. <http://dx.doi.org/10.1371/journal.pgen.1001164>

- 1056 Knöppel A, Knopp M, Albrecht LM, Lundin E, Lustig U, Näsval J, Andersson DI.  
1057 2018. Genetic Adaptation to Growth Under Laboratory Conditions in *Escherichia coli*  
1058 and *Salmonella enterica*. *Front Microbiol* 9:756.  
1059 <http://dx.doi.org/10.3389/fmicb.2018.00756>
- 1060 Koskiniemi S, Sun S, Berg OG, Andersson DI. 2012. Selection-driven gene loss in  
1061 bacteria. *PLoS genetics* 8:e1002787. <http://dx.doi.org/10.1371/journal.pgen.1002787>
- 1062 Kram KE, Geiger C, Ismail WM, Lee H, Tang H, Foster PL, Finkel SE. 2017.  
1063 Adaptation of *Escherichia coli* to Long-Term Serial Passage in Complex Medium:  
1064 Evidence of Parallel Evolution. *mSystems* 2.  
1065 <http://dx.doi.org/10.1128/mSystems.00192-16>
- 1066 LaCroix RA, Sandberg TE, O'Brien EJ, Utrilla J, Ebrahim A, Guzman GI, Szubin R,  
1067 Palsson BO, Feist AM. 2015. Use of adaptive laboratory evolution to discover key  
1068 mutations enabling rapid growth of *Escherichia coli* K-12 MG1655 on glucose  
1069 minimal medium. *Appl Environ Microbiol* 81:17-30.  
1070 <http://dx.doi.org/10.1128/AEM.02246-14>
- 1071 Lambertsen L, Sternberg C, Molin S. 2004. Mini-Tn7 transposons for site-specific  
1072 tagging of bacteria with fluorescent proteins. *Environmental microbiology* 6:726-732.  
1073 <http://dx.doi.org/10.1111/j.1462-2920.2004.00605.x>
- 1074 Lee MC, Marx CJ. 2012. Repeated, selection-driven genome reduction of accessory  
1075 genes in experimental populations. *PLoS genetics* 8:e1002651.  
1076 <http://dx.doi.org/10.1371/journal.pgen.1002651>
- 1077 Lee VT, Matewish JM, Kessler JL, Hyodo M, Hayakawa Y, Lory S. 2007. A cyclic-  
1078 di-GMP receptor required for bacterial exopolysaccharide production. *Mol Microbiol*  
1079 65:1474-1484. <http://dx.doi.org/10.1111/j.1365-2958.2007.05879.x>

- 1080 Liang ZX. 2015. The expanding roles of c-di-GMP in the biosynthesis of  
1081 exopolysaccharides and secondary metabolites. *Nat Prod Rep* 32:663-683.  
1082 <http://dx.doi.org/10.1039/c4np00086b>
- 1083 Lind PA, Arvidsson L, Berg OG, Andersson DI. 2017a. Variation in mutational  
1084 robustness between different proteins and the predictability of fitness effects.  
1085 *Molecular biology and evolution* 34:408-418.  
1086 <http://dx.doi.org/10.1093/molbev/msw239>
- 1087 Lind PA, Farr AD, Rainey PB. 2017b. Evolutionary convergence in experimental  
1088 *Pseudomonas* populations. *ISME J* 11:589-600.  
1089 <http://dx.doi.org/10.1038/ismej.2016.157>
- 1090 Lind PA, Farr AD, Rainey PB. 2015. Experimental evolution reveals hidden diversity  
1091 in evolutionary pathways. *eLife* 4. <http://dx.doi.org/10.7554/eLife.07074>
- 1092 Lind PA, Libby E, Herzog J, Rainey PB. 2019. Predicting mutational routes to new  
1093 adaptive phenotypes. *eLife* 8. <http://dx.doi.org/10.7554/eLife.38822>
- 1094 Long A, Liti G, Luptak A, Tenailon O. 2015. Elucidating the molecular architecture  
1095 of adaptation via evolve and resequence experiments. *Nature reviews. Genetics*  
1096 16:567-582. <http://dx.doi.org/10.1038/nrg3937>
- 1097 Lukacisinova M, Bollenbach T. 2017. Toward a quantitative understanding of  
1098 antibiotic resistance evolution. *Curr Opin Biotechnol* 46:90-97.  
1099 <http://dx.doi.org/10.1016/j.copbio.2017.02.013>
- 1100 Lundin E, Tang PC, Guy L, Nasvall J, Andersson DI. 2017. Experimental  
1101 determination and prediction of the fitness effects of random point mutations in the  
1102 biosynthetic enzyme HisA. *Molecular biology and evolution*.  
1103 <http://dx.doi.org/10.1093/molbev/msx325>

- 1104 McDonald MJ, Cooper TF, Beaumont HJE, Rainey PB. 2011. The distribution of  
1105 fitness effects of new beneficial mutations in *Pseudomonas fluorescens*. *Biology*  
1106 *Letters* 7:98-100. [http://dx.doi.org/Doi 10.1098/Rsbl.2010.0547](http://dx.doi.org/Doi%2010.1098/Rsbl.2010.0547)
- 1107 McDonald MJ, Gehrig SM, Meintjes PL, Zhang XX, Rainey PB. 2009. Adaptive  
1108 divergence in experimental populations of *Pseudomonas fluorescens*. IV. Genetic  
1109 constraints guide evolutionary trajectories in a parallel adaptive radiation. *Genetics*  
1110 183:1041-1053. <http://dx.doi.org/10.1534/genetics.109.107110>
- 1111 McElroy KE, Hui JG, Woo JK, Luk AW, Webb JS, Kjelleberg S, Rice SA, Thomas  
1112 T. 2014. Strain-specific parallel evolution drives short-term diversification during  
1113 *Pseudomonas aeruginosa* biofilm formation. *Proceedings of the National Academy of*  
1114 *Sciences of the United States of America* 111:E1419-1427.  
1115 <http://dx.doi.org/10.1073/pnas.1314340111>
- 1116 Morgan JL, McNamara JT, Zimmer J. 2014. Mechanism of activation of bacterial  
1117 cellulose synthase by cyclic di-GMP. *Nat Struct Mol Biol* 21:489-496.  
1118 <http://dx.doi.org/10.1038/nsmb.2803>
- 1119 O'Neill AJ, Huovinen T, Fishwick CW, Chopra I. 2006. Molecular genetic and  
1120 structural modeling studies of *Staphylococcus aureus* RNA polymerase and the  
1121 fitness of rifampin resistance genotypes in relation to clinical prevalence. *Antimicrob*  
1122 *Agents Chemother* 50:298-309. <http://dx.doi.org/10.1128/AAC.50.1.298-309.2006>
- 1123 Orgogozo V. 2015. Replaying the tape of life in the twenty-first century. *Interface*  
1124 *Focus* 5:20150057. <http://dx.doi.org/10.1098/rsfs.2015.0057>
- 1125 Rainey PB, Travisano M. 1998. Adaptive radiation in a heterogeneous environment.  
1126 *Nature* 394:69-72. <http://dx.doi.org/10.1038/27900>



- 1127 Römling U, Galperin MY, Gomelsky M. 2013. Cyclic di-GMP: the first 25 years of a  
1128 universal bacterial second messenger. *Microbiology and molecular biology reviews* :  
1129 *MMBR* 77:1-52. <http://dx.doi.org/10.1128/MMBR.00043-12>
- 1130 Sandberg TE, Pedersen M, LaCroix RA, Ebrahim A, Bonde M, Herrgard MJ, Palsson  
1131 BO, Sommer M, Feist AM. 2014. Evolution of *Escherichia coli* to 42 degrees C and  
1132 subsequent genetic engineering reveals adaptive mechanisms and novel mutations.  
1133 *Molecular biology and evolution* 31:2647-2662.  
1134 <http://dx.doi.org/10.1093/molbev/msu209>
- 1135 Sankar TS, Wastuwidyaningtyas BD, Dong Y, Lewis SA, Wang JD. 2016. The nature  
1136 of mutations induced by replication-transcription collisions. *Nature*.  
1137 <http://dx.doi.org/10.1038/nature18316>
- 1138 Schenk MF, Szendro IG, Krug J, de Visser JA. 2012. Quantifying the adaptive  
1139 potential of an antibiotic resistance enzyme. *PLoS genetics* 8:e1002783.  
1140 <http://dx.doi.org/10.1371/journal.pgen.1002783>
- 1141 Silby MW, Cerdeno-Tarraga AM, Vernikos GS, Giddens SR, Jackson RW, Preston  
1142 GM, Zhang XX, Moon CD, Gehrig SM, Godfrey SA, et al. 2009. Genomic and  
1143 genetic analyses of diversity and plant interactions of *Pseudomonas fluorescens*.  
1144 *Genome biology* 10:R51. <http://dx.doi.org/10.1186/gb-2009-10-5-r51>
- 1145 Sleight SC, Orlic C, Schneider D, Lenski RE. 2008. Genetic basis of evolutionary  
1146 adaptation by *Escherichia coli* to stressful cycles of freezing, thawing and growth.  
1147 *Genetics* 180:431-443. <http://dx.doi.org/10.1534/genetics.108.091330>
- 1148 Sommer MOA, Munck C, Toft-Kehler RV, Andersson DI. 2017. Prediction of  
1149 antibiotic resistance: time for a new preclinical paradigm? *Nature reviews*.  
1150 *Microbiology* 15:689-696. <http://dx.doi.org/10.1038/nrmicro.2017.75>

- 1151 Spiers AJ, Bohannon J, Gehrig SM, Rainey PB. 2003. Biofilm formation at the air-  
1152 liquid interface by the *Pseudomonas fluorescens* SBW25 wrinkly spreader requires an  
1153 acetylated form of cellulose. *Molecular microbiology* 50:15-27.
- 1154 Spiers AJ, Kahn SG, Bohannon J, Travisano M, Rainey PB. 2002. Adaptive  
1155 divergence in experimental populations of *Pseudomonas fluorescens*. I. Genetic and  
1156 phenotypic bases of wrinkly spreader fitness. *Genetics* 161:33-46.
- 1157 Spiers AJ, Rainey PB. 2005. The *Pseudomonas fluorescens* SBW25 wrinkly spreader  
1158 biofilm requires attachment factor, cellulose fibre and LPS interactions to maintain  
1159 strength and integrity. *Microbiology* 151:2829-2839.  
1160 <http://dx.doi.org/10.1099/mic.0.27984-0>
- 1161 Steiner S, Lori C, Boehm A, Jenal U. 2013. Allosteric activation of exopolysaccharide  
1162 synthesis through cyclic di-GMP-stimulated protein-protein interaction. *EMBO J*  
1163 32:354-368. <http://dx.doi.org/10.1038/emboj.2012.315>
- 1164 Tenailon O, Rodriguez-Verdugo A, Gaut RL, McDonald P, Bennett AF, Long AD,  
1165 Gaut BS. 2012. The molecular diversity of adaptive convergence. *Science* 335:457-  
1166 461. <http://dx.doi.org/10.1126/science.1212986>
- 1167 Whiteside MD, Winsor GL, Laird MR, Brinkman FS. 2013. OrtholugeDB: a bacterial  
1168 and archaeal orthology resource for improved comparative genomic analysis. *Nucleic*  
1169 *Acids Res* 41:D366-376. <http://dx.doi.org/10.1093/nar/gks1241>
- 1170 Whitney JC, Whitfield GB, Marmont LS, Yip P, Neculai AM, Lobsanov YD,  
1171 Robinson H, Ohman DE, Howell PL. 2015. Dimeric c-di-GMP is required for post-  
1172 translational regulation of alginate production in *Pseudomonas aeruginosa*. *J Biol*  
1173 *Chem* 290:12451-12462. <http://dx.doi.org/10.1074/jbc.M115.645051>
- 1174 Wichman HA, Badgett MR, Scott LA, Boulianne CM, Bull JJ. 1999. Different  
1175 trajectories of parallel evolution during viral adaptation. *Science* 285:422-424.

1176 Winsor GL, Griffiths EJ, Lo R, Dhillon BK, Shay JA, Brinkman FS. 2016. Enhanced  
1177 annotations and features for comparing thousands of *Pseudomonas* genomes in the  
1178 *Pseudomonas* genome database. Nucleic Acids Res 44:D646-653.  
1179 <http://dx.doi.org/10.1093/nar/gkv1227>  
1180



|                 |              |                   |           |          |            |                            |             |
|-----------------|--------------|-------------------|-----------|----------|------------|----------------------------|-------------|
| 1302250         | Transversion | t->g              | 812       | PFL_1134 | wspF       | V271G                      | No          |
| 1302250         | Transversion | t->g              | 812       | PFL_1134 | wspF       | V271G                      | No          |
| 1302250         | Transversion | t->g              | 812       | PFL_1134 | wspF       | V271G                      | No          |
| 1302327         | Transition   | c->a              | 889       | PFL_1134 | wspF       | Q297K                      | Q->R        |
| 1302327         | Transition   | c->a              | 889       | PFL_1134 | wspF       | Q297K                      | Q->R        |
| 1301579-1301593 | Duplication  | Duplication 15 bp | 141-155   | PFL_1134 | wspF       | Duplication L51-I55        | Del L51-I55 |
| 3548383         | Transition   | c->t              | -98       | PFL_3078 |            | PFL_3078-PFL_3093 promoter |             |
| 3548383         | Transition   | c->t              | -98       | PFL_3078 |            | PFL_3078-PFL_3093 promoter |             |
| 3548385         | Transition   | c->t              | -96       | PFL_3078 |            | PFL_3078-PFL_3093 promoter |             |
| 6114402         | Transversion | a->t              | 2237      | PFL_5345 | mwsR, morA | Q746L                      | No          |
| 6114696         | Transition   | a->g              | 2531      | PFL_5345 | mwsR, morA | H844R                      | No          |
| 6114940         | Transition   | g->a              | 2775      | PFL_5345 | mwsR, morA | M925I                      | Yes         |
| 6115236         | Transversion | t->a              | 3071      | PFL_5345 | mwsR, morA | L1024Q                     | No          |
| 6115406         | Transition   | g->a              | 3241      | PFL_5345 | mwsR, morA | E1081K                     | Yes         |
| 6115406         | Transition   | g->a              | 3241      | PFL_5345 | mwsR, morA | E1081K                     | Yes         |
| 6115406         | Transition   | g->a              | 3241      | PFL_5345 | mwsR, morA | E1081K                     | Yes         |
| 6115406         | Transition   | g->a              | 3241      | PFL_5345 | mwsR, morA | E1081K                     | Yes         |
| 6115415         | Transition   | g->a              | 3250      | PFL_5345 | mwsR, morA | G1084R                     | G->S        |
| 6115107-6115130 | Duplication  | Duplication 24 bp | 2942-2965 | PFL_5345 | mwsR, morA | P981-S988                  | No          |

|                              |             |                    |           |          |  |                           |  |
|------------------------------|-------------|--------------------|-----------|----------|--|---------------------------|--|
| <b><i>Δwsp Δaws Δmws</i></b> |             |                    |           |          |  |                           |  |
| 86862-86873                  | Deletion    | Deletion 12 bp     | 1389-1400 | PFL_0087 |  | S463R, deletion N464-Q466 |  |
| 86876-86893                  | Deletion    | Deletion 18 bp     | 1403-1420 | PFL_0087 |  | Deletion D470-S475        |  |
| 86949-86978                  | Deletion    | Deletion 30 bp     | 1476-1505 | PFL_0087 |  | Deletion Q494-L503        |  |
| 86949-86978                  | Deletion    | Deletion 30 bp     | 1476-1505 | PFL_0087 |  | Deletion Q494-L503        |  |
| 86972-87172                  | Duplication | Duplication 201 bp | 1499-1699 | PFL_0087 |  | Insertion 67 aa           |  |
| 87014-87199                  | Duplication | Duplication 185 bp | 1541-1726 | PFL_0087 |  | Duplication E544-P571     |  |

**Figure 7 - source data. Fitness assays**

**Invasion - selection coefficients**

|                    |       |       |        |       |       |       |        |       |        |
|--------------------|-------|-------|--------|-------|-------|-------|--------|-------|--------|
| Wild type          | 0,003 | 0,002 | -0,005 | 0,012 | 0,013 | 0,010 | -0,039 | 0,021 | -0,017 |
| WspF V271G         | 0,363 | 0,330 | 0,303  | 0,318 | 0,319 | 0,340 |        |       |        |
| WspF Q297K         | 0,362 | 0,225 | 0,347  | 0,331 | 0,269 | 0,282 |        |       |        |
| WspE S661L         | 0,334 | 0,349 | 0,377  | 0,362 | 0,335 | 0,391 |        |       |        |
| AwsX del V133-P143 | 0,300 | 0,219 | 0,358  | 0,223 | 0,271 | 0,261 |        |       |        |
| AwsR A194V         | 0,308 | 0,351 | 0,280  | 0,262 | 0,292 | 0,262 |        |       |        |
| Promoter AwsXRO    | 0,412 | 0,526 | 0,476  | 0,348 | 0,336 | 0,376 |        |       |        |
| MwsR M925I         | 0,392 | 0,394 | 0,432  | 0,346 | 0,341 | 0,373 |        |       |        |
| MwsR E1081K        | 0,322 | 0,420 | 0,357  | 0,326 | 0,321 | 0,283 |        |       |        |
| PFL_3078 Promoter  | 0,313 | 0,351 | 0,320  | 0,321 | 0,334 | 0,326 |        |       |        |
| PFL_0087 D470-S475 | 0,390 | 0,407 | 0,433  | 0,393 | 0,417 | 0,429 |        |       |        |
| PFL_0087 Q494-L503 | 0,428 | 0,378 | 0,383  | 0,419 | 0,453 | 0,433 |        |       |        |
| WspA del T293-E299 | 0,435 | 0,439 | 0,440  | 0,444 | 0,429 | 0,416 |        |       |        |

**Competition - selection coefficients**

|                    |        |        |        |        |        |       |        |       |  |
|--------------------|--------|--------|--------|--------|--------|-------|--------|-------|--|
| Wild type          | -0,230 | -0,207 | -0,196 | -0,175 |        |       |        |       |  |
| WspF V271G         | 0,033  | -0,021 | -0,011 | -0,029 | -0,014 | 0,027 | -0,015 | 0,010 |  |
| WspF Q297K         | 0,015  | 0,017  | -0,009 | -0,010 |        |       |        |       |  |
| WspE S661L         | -0,008 | 0,001  | 0,002  | 0,050  |        |       |        |       |  |
| AwsX ΔV133-P143    | -0,030 | -0,082 | -0,088 | -0,058 |        |       |        |       |  |
| AwsR A194V         | -0,113 | -0,079 | 0,008  | -0,020 |        |       |        |       |  |
| Promoter AwsXRO    | 0,041  | 0,009  | 0,034  | 0,039  |        |       |        |       |  |
| MwsR M925I         | -0,006 | -0,007 | -0,011 | 0,003  |        |       |        |       |  |
| MwsR E1081K        | 0,085  | 0,072  | 0,036  | 0,050  |        |       |        |       |  |
| PFL_3078 Promoter  | -0,066 | -0,146 | -0,088 | -0,102 |        |       |        |       |  |
| PFL_0087 D470-S475 | -0,055 | -0,056 | -0,069 | -0,089 |        |       |        |       |  |
| PFL_0087 Q494-L503 | -0,056 | -0,050 | -0,030 | -0,026 |        |       |        |       |  |
| WspA del T293-E299 | -0,145 | -0,068 | -0,062 | -0,049 |        |       |        |       |  |

## Figure 8 - source data. Fitness assays for del pel mutants

### Invasion - selection coefficients

|                                |       |       |       |       |       |       |
|--------------------------------|-------|-------|-------|-------|-------|-------|
| <i>Δpel</i> WspF V271G         | 0,212 | 0,253 | 0,227 | 0,199 | 0,197 | 0,201 |
| <i>Δpel</i> WspF Q297K         | 0,210 | 0,162 | 0,173 | 0,176 | 0,212 | 0,223 |
| <i>Δpel</i> AwsX del V133-P143 | 0,311 | 0,222 | 0,184 | 0,202 | 0,203 | 0,178 |
| <i>Δpel</i> MwsR E1081K        | 0,225 | 0,209 | 0,248 | 0,204 | 0,185 | 0,205 |
| <i>Δpel</i> PFL_0087 D470-S475 | 0,223 | 0,244 | 0,206 | 0,222 | 0,259 | 0,257 |

### Competition - selection coefficients

|                                |        |        |        |        |
|--------------------------------|--------|--------|--------|--------|
| <i>Δpel</i> WspF V271G         | -0,171 | -0,177 | -0,206 | -0,174 |
| <i>Δpel</i> WspF Q297K         | -0,041 | -0,114 | -0,104 | -0,069 |
| <i>Δpel</i> AwsX del V133-P143 | -0,171 | -0,104 | -0,200 | -0,151 |
| <i>Δpel</i> MwsR E1081K        | -0,042 | -0,025 | -0,112 | -0,072 |
| <i>Δpel</i> PFL_0087 D470-S475 | -0,179 | -0,255 | -0,179 | -0,237 |

**Table S1. Oligonucleotide primers used for PCR, sequencing and genetic reconst**

**Cloning**

pEX18Gm\_MCS\_F      tgttgtgtggaattgtgag  
pEX18Gm\_MCS\_R      ctgcaaggcgattaagttg

***wsp* operon**

PFL\_1133\_EcoRI\_F      agttgctggcggagaaaaac  
WspE\_1550F            ttcccgtggcccatatcga  
WspE\_2119F            atcaccgacatcgacatgc  
WspE\_2213F            gtctacaaggaccgtga  
WspF\_154R             caccggcatgatcaggccat  
WspR\_70R              gttcgcgatcatggcctg  
WspR\_398F             tggggcgcgccattcgcta  
WspR\_553R             cactccagctccaggta  
WspR\_620R             gtaggtctgaagtagtcg  
PFL\_1128\_F\_EcoRI      tagGAATTCcaagaaggcccgaagtac  
PFL\_1128\_UR\_SOE      cgtatctgctagattccgaatgagtcagtcctcgaggccat  
PFL\_1135\_DF\_SOE      cttcggaaatctagcaggatacggagtaaccgctcagcttc  
PFL\_1136\_F\_SalI      catGTCGACgaatcactgattcacggcag

***aws* operon**

RecC\_F\_HindIII        tagaagcttctgataccgccaagagttc  
RecC\_R\_KpnI            catggtaccccagtcggtcgcataacct  
recD\_F\_EcoRI          acggaattcccactacctaagtactg  
PFL\_0743\_R\_SOE        cgttagaaatcggctaggcttcagagaaaggccggaacatg  
PFL\_0743-SalI\_F        tgtgtgctgtcgaccattc  
awsR\_182R              agctgatggagcgggcatca  
awsR\_677F              cgactcaacgcctgct  
PFL\_0745\_F\_SOE        tgaagcctagccgatttctaacgatcgtggtgatcgccgact  
awsO\_DR                ttacatccgagagtgac  
PFL\_0746\_F\_HindIII    tgcaagcttcttctcatcaccccgaa

***mwsR***

PFL\_5345\_UF\_EcoRI    actgaattcatggctccagcttggcct  
PFL\_5345\_UR\_SOE      cagtcgattacgtactatagcaggctgtgatcctgcggttg  
mwsR\_HindIII\_F        gtaagcttagaccagctgttctgttc  
mwsR\_2144F            gccgcgacatcagccagca  
PFL\_5345\_SeqF         gaaaaggacctgcgcatg  
PFL\_5345\_SeqR         gaactgctgaggtagttc  
mwsR\_3599R            gaaggtgcggtcgatcttca  
mwsR\_SalI\_R            aggccgtcgacgaaggtgc  
PFL\_5345\_DF\_SOE      ctgctatagtagtaatcgactgcacccctgcttgcgtaat  
PFL\_5346\_R\_HindIII    gtcaagcttccagcatttcgcgaaac

**PFL\_0087**

PFL\_0087\_KpnI\_F      catggtaccgaagccgttgcgacgaatc



PFL\_0087\_seqF aagcaaccatttcgcctgt  
PFL\_0087\_seqR tgccatggttgccattg  
PFL\_0087\_HindIII\_R tagaagcttggtcctcaaccagcttc

**PFL\_3078-3093**

PFL\_3077\_KpnI\_F catggtaccgcgaaagtcccgggtgaag  
PFL\_3078\_HindIII\_R tagaagcttggtggccatctcgttcatg

***pel*ABCDEFGF**

PFL\_2971\_F\_EcoRI ctggaattcagcgagtactacctggactt  
PFL\_2972\_DelCh caaggccaatgctgtaaaca  
PFL\_2972\_UR\_SOE attgggccctctatgtcgacatcaactcactcttcagtagatcaatct  
PFL\_2978\_DF\_SOE gatgtcgacatagagggccaatttgaggagcatcggcaagc  
PFL\_2979\_R\_HindIII agtgcccaagagcagaagc
