25 **Abstract**

26 Experimental evolution is often highly repeatable, but the underlying causes are  
27 generally unknown, which prevents extension of evolutionary forecasts to related  
28 species. Data on adaptive phenotypes, mutation rates and targets from the  
29 *Pseudomonas fluorescens* SBW25 Wrinkly Spreader system combined with  
30 mathematical models of the genotype-to-phenotype map allowed evolutionary  
31 forecasts to be made for several related *Pseudomonas* species. Predicted outcomes of  
32 experimental evolution in terms of phenotype, types of mutations, relative rates of  
33 pathways and mutational targets were then tested in *Pseudomonas protegens* Pf-5. As  
34 predicted, most mutations were found in three specific regulatory pathways resulting  
35 in increased production of Pel exopolysaccharide. Mutations were, as predicted,  
36 mainly found to disrupt negative regulation with a smaller number in upstream  
37 promoter regions. Mutated regions in proteins could also be predicted, but most  
38 mutations were not identical to those previously found. This study demonstrates the  
39 potential of short-term evolutionary forecasting in experimental populations.

40

## 41 Introduction

42 An increasing number of experimental evolution studies, primarily using microbes,  
43 have provided insights into many fundamental questions in evolutionary biology  
44 including the repeatability of evolutionary processes (Barrick and Lenski 2013;  
45 Jerison and Desai 2015; Long, et al. 2015; Orgogozo 2015). Given the ability to  
46 control environmental conditions as well as population size and the use of a single  
47 asexual organism, such studies could provide an ideal test of our ability to predict  
48 evolutionary outcomes in simplified model systems. High repeatability on both  
49 phenotypic and genetic level have been observed in a large number of experimental  
50 evolution studies (Wichman, et al. 1999; Conrad, et al. 2009; Lee and Marx 2012;  
51 Tenaillon, et al. 2012; Barrick and Lenski 2013; Ferguson, et al. 2013; Herron and  
52 Doebeli 2013; Blank, et al. 2014; McElroy, et al. 2014; Fraebel, et al. 2017; Kram, et  
53 al. 2017; Knoppel, et al. 2018), but it has become clear that high repeatability alone is  
54 not sufficient for testing evolutionary predictability beyond the prediction that under  
55 identical conditions the same evolutionary outcome is likely. The difficulties of  
56 moving from repeatability to predictability are largely a result of the lack of  
57 knowledge of the genotype-phenotype-fitness map (Figure 1).

58

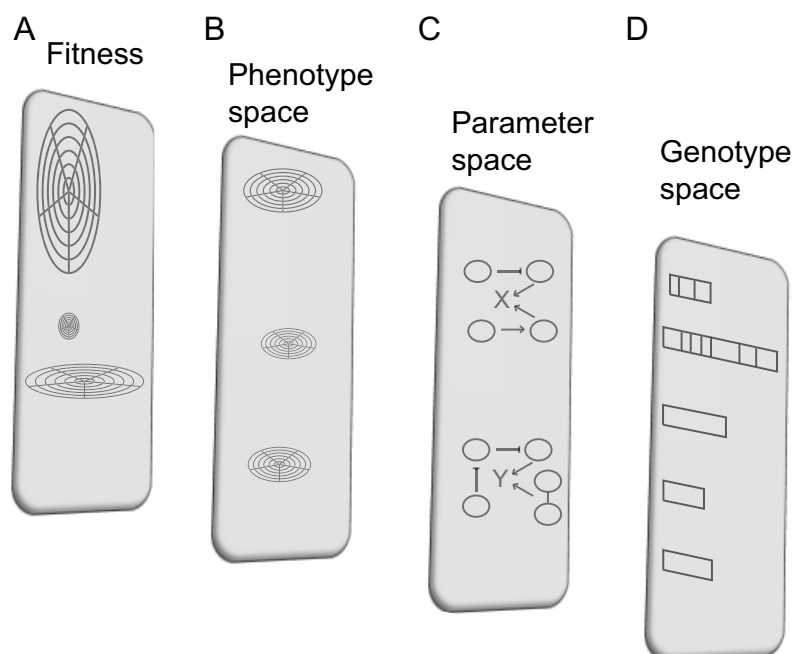

59

60 **Figure 1. Prediction of the adaptive outcomes of experimental evolution requires**  
61 **understanding of how genotypes map to phenotypes and fitness.** The differing  
62 capacity of genes to translate genotypic variation into phenotypic variation and

63 differences in mutation rates can introduce biases in the production of phenotypic  
64 variation. Natural selection, genetic architecture and mutational biases can both  
65 increase and decrease the predictability of evolution depending on if they can be  
66 recognized beforehand and included into evolutionary forecasting models. **(A)**  
67 **Fitness space.** Mutants that increase to high frequencies in the population are all  
68 expected to have increased fitness as drift is negligible at population sizes typically  
69 used for adaptation experiments with microbes. Much effort has been put into  
70 characterizing the distribution of fitness effects of beneficial mutations, but the shapes  
71 of the distribution and magnitudes of the fittest mutations appear to be highly context  
72 dependent. Many different phenotypes are typically adaptive during experimental  
73 evolution, but in most cases they are not known beforehand and their relative fitness  
74 cannot be predicted. Relative fitness is, in most cases, also expected to be highly  
75 dependent on external environment including the frequency of other adaptive mutants,  
76 which means that even small changes to experimental protocols can lead to difference  
77 in outcomes. **(B) Phenotype space.** Each of the adaptive phenotypes can usually be  
78 realized by mutations in different positions and in different genes, but distinct  
79 phenotypes are expected to have similar fitness regardless of genetic foundations,  
80 which can simplify predictions. Depending on the genetic architecture underlying  
81 each trait, which is often unknown, adaptive phenotypes are produced at different  
82 rates. **(C) Parameter space.** The adaptive phenotypes are caused by changes in the  
83 molecular networks of cells, which are also influenced by the external environment. If  
84 the wiring of a molecular network underpinning an adaptive phenotype is well  
85 understood, parameterization of the system is possible and predictive models can be  
86 formulated. Mutations can cause functional effects on gene products, but mutations in  
87 some genes are more likely to lead to phenotypic variation. This can for example be  
88 due to differences in mutational robustness of the gene products themselves or their  
89 functions in regulatory networks. **(D) Genotype space.** Mutation rates are not  
90 uniform across the genome and mutational hot spots can lead to bias in the number of  
91 mutants producing relevant changes in parameter space and causing new phenotypes  
92 that are presented for natural selection to act upon. The current understanding of the  
93 distribution of mutation rates is limited and computational predictions have not yet  
94 been described. Adding information about well-characterized mutational hot spots,  
95 including indels in homonucleotide tracts or deletion and duplication between  
96 sequence homologies, could possibly improve prediction compared to a null model

97 with uniform rates. Alternatively experimental data might be incorporated into models  
98 of mutation rates to improve predictions.

99

100

101 There are several problems that need to be solved to develop a model system for true  
102 testing of predictive ability. In some cases adaptive mutations are highly strain  
103 specific, so that for example adaptation of different strains to a specific environment  
104 will produce different results. In some cases this is due to the long history of sub-  
105 culturing under laboratory conditions combined with rounds of mutagenesis that has  
106 caused, for example, many *E. coli* and *Salmonella* strains to accumulate diverse  
107 mutations, some of which are rapidly compensated by secondary mutations restoring  
108 fitness (Barrick, et al. 2009; Tenaillon, et al. 2012; Knoppel, et al. 2018). Thus, in  
109 many cases conclusions from one strain cannot be extended to another because of  
110 differences in their genotype-to-phenotype maps (Figure 1C).

111

112 Another problem for testing predictability is that in many cases it is not possible to  
113 design an experiment where one specific selective pressure is dominant. For example  
114 experiments with intended adaptation to high temperature (Tenaillon, et al. 2012) or  
115 freeze-thaw-growth cycles (Sleight, et al. 2008) result in similar mutations in *uspA*,  
116 which may indicate adaptation to the medium used (Knoppel, et al. 2018) or generally  
117 stressful conditions. Relatively minor changes in environmental conditions can also  
118 results in divergent mutational patterns (Deatherage, et al. 2017). This means that the  
119 range of possible adaptive phenotypes cannot be defined beforehand (Figure 1B) and  
120 that in many cases the phenotypes that solve the intended selective problem are  
121 outcompeted by other phenotypes with increased fitness (Figure 1A).

122

123 A highly specific selective pressure can be applied by selection for antibiotic  
124 resistance and mutation targets are often highly conserved between different strains  
125 and species and between laboratory and natural populations (O'Neill, et al. 2006;  
126 Schenk, et al. 2012; Brandis, et al. 2015; Jahn, et al. 2017; Lukacisinova and  
127 Bollenbach 2017; Sommer, et al. 2017). However resistance phenotypes are often  
128 explained solely by the molecular phenotype of a single protein and no alternative  
129 pathways to resistance are known resulting in a relatively simple parameter and  
130 genotype space (Figure 1C, Figure 1D). Thus the prediction will be identical for all

131 species and it cannot provide a test of prediction from general principles. In many  
132 cases mutants isolated after selection for high-level antibiotic resistance also lacks the  
133 complexity that is inherent to many phenotypic traits where the genotype-to-  
134 phenotype map involves a large number of functional interactions and complex  
135 regulation (Figure 1C). This complexity comes to light in that adaptive mutations to  
136 new environments are commonly found in global regulators of gene expression such  
137 as genes involved in the stringent response, DNA binding proteins, supercoiling and  
138 core genes for RNA and protein synthesis (Barrick, et al. 2009; Conrad, et al. 2009;  
139 Kishimoto, et al. 2010; Tenaillon, et al. 2012; Herron and Doebeli 2013; Sandberg, et  
140 al. 2014; LaCroix, et al. 2015; Deatherage, et al. 2017). The physiological effects of  
141 these mutations are diverse, sometimes affecting the expression of hundreds of genes  
142 making the elucidation of the molecular underpinnings of the adaptive phenotype  
143 (Figure 1C, 1D) extremely complex and thus difficult to use for predictive modeling.

144

145 The wrinkly spreader model in *P. fluorescens* SBW25 (hereafter SBW25) is one of  
146 the best-characterized experimental evolution systems and has several properties that  
147 could make it possible to extend knowledge and principles from this species to related  
148 species (Rainey and Travisano 1998; Spiers, et al. 2002; Spiers, et al. 2003; Spiers  
149 and Rainey 2005; Goymer, et al. 2006; Bantinaki, et al. 2007; McDonald, et al. 2009;  
150 Silby, et al. 2009; Ferguson, et al. 2013; Lind, et al. 2015, 2017b; Lind, et al. 2018).  
151 When the wild type SBW25 is placed into a static growth tube the oxygen in the  
152 medium is rapidly consumed by growing bacteria (Figure 2A). However oxygen  
153 levels at the surface are high and mutants that are able to colonize the air-liquid  
154 interface have a major growth advantage and rapidly increase in frequency (Figure  
155 2A). Several phenotypic solutions to air-liquid interface colonization, all involving  
156 increased cell-cell adhesion, have been described and are distinguishable by their  
157 colony morphology on agar plates (Figure 2A, 2B) (Rainey and Travisano 1998;  
158 Ferguson, et al. 2013; Lind, et al. 2017b). The most successful of these is the Wrinkly  
159 Spreader (WS) (Ferguson, et al. 2013; Lind, et al. 2017b) that overproduces a  
160 cellulosic polymer that is the main structural component of the mat at the air-liquid  
161 interface (Spiers, et al. 2002; Spiers, et al. 2003). The WS phenotype is caused by  
162 mutational activation of c-di-GMP production by a diguanylate cyclase (DGC)  
163 (Figure 2C) (Goymer, et al. 2006). While many different DGCs can be activated to  
164 reach the WS phenotype, some are greatly overrepresented due to larger mutational

165 target sizes leading to a hierarchy of genetic routes to WS (Figure 2D) (McDonald, et  
 166 al. 2009; Lind, et al. 2015). The genotype-to-phenotype map to WS has been  
 167 characterized in detail (Goymer, et al. 2006; McDonald, et al. 2009; Lind, et al. 2018)  
 168 allowing the development of mathematical models of the three main pathways to WS  
 169 (Wsp, Aws and Mws) and the prediction of evolutionary outcomes (Figure 2E) (Lind,  
 170 et al. 2018).  
 171

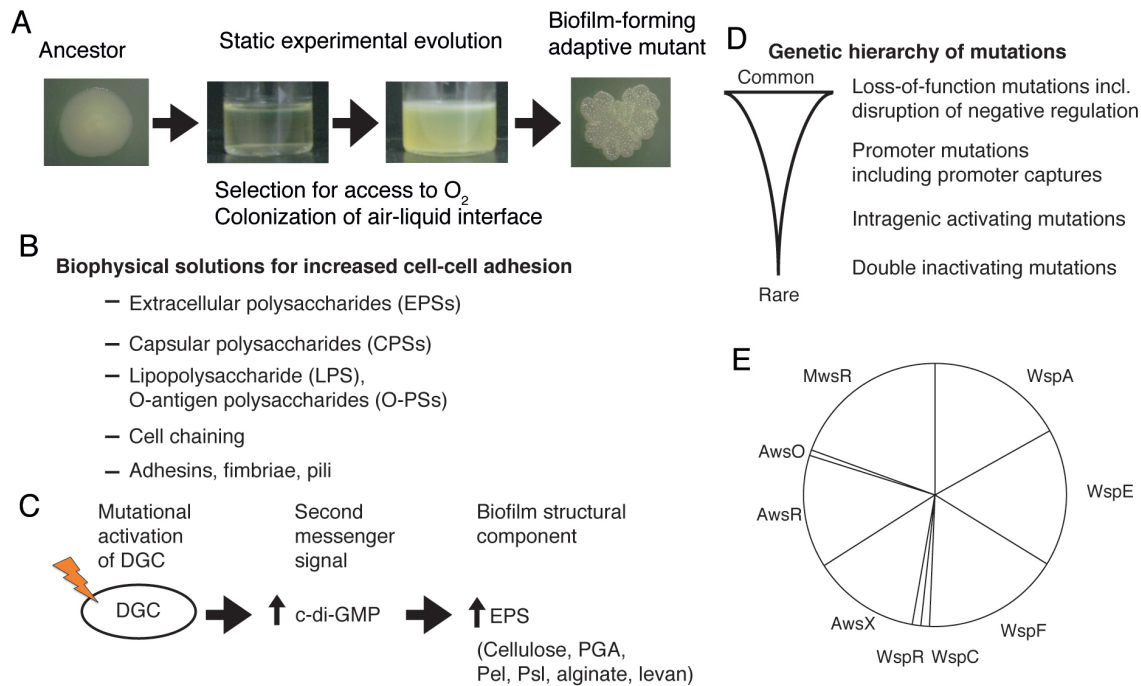

173 **Figure 2.** The *Pseudomonas fluorescens* SBW25 “wrinkly spreader” model system  
 174 has several properties that could allow its extension to other species (A) The ancestral  
 175 strain that has smooth colony morphology on agar plate is inoculated into static  
 176 growth tubes and incubated for several days. Depletion of oxygen in the medium  
 177 leads to competition for access to the oxygen-replete surface which is colonized by  
 178 mutants with enhanced ability for cell-cell adherence and adherence to the wall of the  
 179 tube. The most successful of these mutant types is the wrinkly spreader that has a  
 180 distinctive colony morphology due to overproduction of exopolymeric substances  
 181 (EPSs) of which a cellulosic polymer is the main structural component (Spiers, et al.  
 182 2002; Spiers, et al. 2003; Ferguson, et al. 2013; Lind, et al. 2017b) (B) There are  
 183 many potential solutions to colonization of the the air-liquid interface and in  
 184 *Pseudomonas fluorescens* at least four alternative distinct phenotypes are selected for

185 at the surface, but they all have lower fitness than the WS type (Beaumont, et al.  
186 2009; Ferguson, et al. 2013; Gallie, et al. 2015; Lind, et al. 2017b). The SBW25  
187 system is of intermediate complexity in that it allows isolation of a phenotypic subset  
188 of adaptive mutants, those that are selected at the air-liquid interface and produce a  
189 difference in colony morphology, rather than all mutants that increase fitness.  
190 However there is also a large diversity of different genetic and phenotypic solutions to  
191 the dominant adaptive challenge, which makes it of greater complexity than systems  
192 based on single genes, which is often the case for experimental systems using strong  
193 selection for antibiotic resistance. **(C)** The mutational causes of WS in wild type  
194 populations are found in either of three loci, *wspABCDEFR*, *awsXRO* and *mwsR*,  
195 which all encode diguanylate cyclases that produce the second messenger c-di-GMP  
196 (McDonald, et al. 2009) that is a conserved signal for EPS production and biofilm  
197 formation in many bacterial species. In SBW25 the primary EPS used is a cellulosic  
198 polymer. **(D)** While these three pathways account for >98% of WS mutants in the  
199 wild type, 13 additional rare pathways were found when the common ones are  
200 genetically deleted (Lind, et al. 2015). The large differences in mutation rates to WS  
201 for the different pathways are explained mainly by their different capacities to  
202 translate genotypic variation into phenotypic variation, i.e. mutational target size, with  
203 the three common pathways being subject to negative regulation, which when  
204 disrupted results in overproduction of c-di-GMP and the WS phenotype (Lind, et al.  
205 2015). The alternative phenotypic solutions are also caused by inactivating mutations  
206 occurring at high rates (Ferguson, et al. 2013; Lind, et al. 2017b). The pathways to  
207 WS of intermediate frequency are activated by mutations to promoter regions,  
208 including promoter captures and the most rare are those that require specific  
209 activating mutations in the DGC or double mutations in two negative regulators. The  
210 genetic underpinnings of several adaptive phenotypes have been elucidated providing  
211 a mechanistic understanding of the effects of mutations and why they are adaptive.  
212 **(E)** The three main pathways (Wsp, Aws, Mws) to WS are particularly well-  
213 understood allowing formulation of mathematical models of the molecular networks  
214 and prediction of the relative rates of use of the different pathways and genes (Lind, et  
215 al. 2018).  
216  
217 This study makes initial forecasts of phenotypic and genetic evolutionary outcomes  
218 after static experimental evolution for six *Pseudomonas* species based mainly on data





240 additional nine that have been detected only in combinations with other mutations.  
241 SBW25 and Pf-5 share 33 DGCs with 6 unique for each species. It should be noted  
242 that not all DGCs are likely to be catalytically active. **(B)** Diversity of biofilm-related  
243 genes including putative EPSs, LPS modification, cell chaining, adhesins and known  
244 regulators. In SBW25 cellulose-based mats are most successful (encoded by the *wss*  
245 operon). A secondary exopolysaccharide (PGA), encoded by *pgaABCD*, can also be  
246 used to form a stable mat (Lind, et al. 2017b). Fuzzy spreaders (FS) forms rafts that  
247 collapse after becoming too large and the mutational cause is inactivation of *fuzY*,  
248 which results in a defect in lipopolysaccharide (LPS) modification (Ferguson, et al.  
249 2013). Cell-chaining (CC) types have loss-of-function mutations in *nlpD* causing a  
250 defect in cell division, which leads to segmented chains of cells that can form a weak  
251 mat at the surface (Lind, et al. 2017b). Full details are available in Figure 3 - source  
252 data. The genomes of the *P. aeruginosa* strains PA7, UCBPP-PA14 and LESB58  
253 were also included in the analysis and results were in most cases identical to PAO1  
254 (not shown in Figure 3) with the exception of an absence of homologues for EPS  
255 genes *pelA-D* and the DGCs PA2771 in PA14 and PA3343 in PA7.

256

### 257 **Ecotype predictions**

258 Given the range of ways that cells can achieve increased adherence and surface  
259 colonization by use of different EPSs, LPS modification and cell chaining as  
260 demonstrated by the studies with SBW25 (Spiers, et al. 2002; Ferguson, et al. 2013;  
261 Lind, et al. 2017b) all species are be expected to colonize the air-liquid interface if  
262 access to oxygen is limiting for growth. This could be achieved simply by changes in  
263 gene expression in the wild type, but for an experimental evolution study a mutational  
264 solution is sought and environmental conditions are chosen so that the wild type strain  
265 does not colonize the air-liquid interface. However changing environment presents a  
266 further challenge because, as discussed above, it often leads to a different spectrum of  
267 adaptive mutations. Thus a foundational requirement for an extended experimental  
268 evolution system to be successful for different species is that the evolutionary  
269 solutions are robust to differences in environmental conditions.

270

### 271 **Phenotype predictions**

272 Several different phenotypic solutions can be used to colonize the air-liquid interface  
273 in SBW25 including at least two different EPSs (cellulose (WS) and PGA (PWS)),

274 LPS modification (fuzzy spreaders FS) and cell chaining (CC) (Spiers, et al. 2002;  
275 Ferguson, et al. 2013; Lind, et al. 2017b). However wrinkly spreaders that form  
276 cellulose-based mats are superior and rapidly outcompete all other types (Ferguson, et  
277 al. 2013; Lind, et al. 2017b). Based on the limited data available it is predicted that  
278 cellulose-based biofilms are superior in other species as well and that they will be the  
279 primary structural solution when available as for *P. syringae*, *P. putida* and *P.*  
280 *stutzeri*. For the three species lacking genes for cellulose biosynthesis, other EPSs are  
281 predicted to be used. Based on studies of *P. aeruginosa* the primary EPS required for  
282 pellicle formation at the air-liquid interface in this species is Pel, encoded by the  
283 *pelABCDEFG* operon, which is also present in the Pf-5 genome and is predicted to be  
284 the primary phenotypic solution for these species. The genome of *P. savastanoi* lacks  
285 genes for biosynthesis of cellulose and Pel as well as other EPSs that are known to be  
286 able to support mat-formation, such as PGA and there is not sufficient data at this  
287 point to make a prediction of which one is likely to be the primary phenotypic  
288 solution.

289

290 Overexpression of EPSs used for mat-formation at the air-liquid interface is in  
291 SBW25 and *P. aeruginosa* linked to mutations increasing c-di-GMP production rather  
292 than mutations in the promoters of or genes in the EPS operons themselves. This can  
293 be explained by the role of post-translation regulation by c-di-GMP in the production  
294 of cellulose, Pel, PGA and alginate (Lee, et al. 2007; Romling, et al. 2013; Steiner, et  
295 al. 2013; Morgan, et al. 2014; Liang 2015; Whitney, et al. 2015). In these cases  
296 transcriptional upregulation alone is not likely to cause overproduction because of  
297 lack of a c-di-GMP signal. Possibly there is also an additional benefit to using  
298 activation of the c-di-GMP network in that it reduces motility, which is not needed  
299 when established at the air-liquid interface and which consumes large amount of  
300 energy to sustain and thus is likely to be selected against (Koskiniemi, et al. 2012; Lee  
301 and Marx 2012).

302

### 303 **Prediction of types of mutations**

304 Disabling mutations are expected to be more common than enabling mutations and  
305 therefore the prediction is that most mutations will be in genes where loss-of-function  
306 mutations produce an adaptive phenotype (Fig 2D) (Lind, et al. 2015). This is the case  
307 for the large majority of mutations in SBW25 including those activating main DGCs

308 WspR, AwsR and MwsR, which are all under negative regulation, as well as  
309 disruption of the genes underpinning the FS phenotype (*fuzY*, PFLU0478) and CC  
310 phenotype (*nlpD*, PFLU1301) (McDonald, et al. 2009; Ferguson, et al. 2013; Lind, et  
311 al. 2017b). Next in the hierarchy of mutations are promoter mutations, increasing  
312 transcription, and promoter capture events (Lind, et al. 2015). Less common are  
313 intragenic activating mutations that enable a particular function by for example  
314 increase in catalytic activity or strengthening of interactions to another molecule or  
315 another domain of the same protein (Lind, et al. 2015). Gene duplications occur at a  
316 high rate and clearly have the ability to increase gene expression of DGCs, but they  
317 have not yet been found to cause WS in SBW25, possibly because a two-fold increase  
318 in gene expression is insufficient.

319

### 320 **Prediction of pathways used**

321 There are at least 16 different pathways to the WS phenotype in SBW25 with similar  
322 fitness, but they are used at frequencies that vary over several orders of magnitude  
323 based on the differing capacity to translate phenotypic variation into phenotypic  
324 variation (Figure 2D) (Lind, et al. 2015). Mutations in three pathways, Wsp, Aws, and  
325 Mws account for >98% of WS mutations and based on a detailed understanding of the  
326 molecular functions of the genes involved of each pathways mathematical models  
327 predicting at which relative rates the pathways should be used were constructed  
328 (Figure 2E) (Lind, et al. 2018). The prediction results varies depending on the rates of  
329 disabling and enabling mutations, but if it is assumed that disabling mutations are at  
330 least an order of magnitude more common than enabling mutations the models predict  
331 that Wsp will account for about 53%, Aws 28% and Mws 19% of the WS mutations  
332 (Figure 2E) (Lind, et al. 2018).

333

334 Less common promoter mutations will also appear at rates at least a magnitude lower,  
335 but which DGCs that will be transcriptionally activated cannot be easily predicted  
336 except for assuming it will be homologs of the ones used in SBW25. These DGCs  
337 must be catalytically active and also be localized to the membrane (Farr, et al. 2017).  
338 Possibly the subset of DGCs that are primarily activated by mutations to their  
339 promoters is mainly determined by mutation rate and a higher mutation rate might be  
340 caused by higher transcription and also influenced by gene direction (Sankar, et al.  
341 2016). Most promoter capture deletion events are less than five kilobases (Lind, et al.

342 2015) in size and the lack of an alternative promoter relatively close upstream to the  
343 DGC is likely to rule out these DGCs. The DGCs that can be activated by intragenic  
344 activating mutations cannot now be predicted beyond the simple prediction that these  
345 are the same genes as in SBW25 (Lind, et al. 2015).

346

#### 347 **Prediction of mutated genes**

348 In addition to predicting the relative rates of the three main pathways, the previously  
349 described mathematical model can also predict which proteins are likely to be  
350 mutated (Lind, et al. 2018). High rates of WS mutations are predicted for WspF,  
351 WspA, WspE, AwsX and AwsR and MwsR (Figure 2E). A significantly lower rate of  
352 enabling mutations is also predicted to occur in WspC, WspR and AwsO (Figure 2E).  
353 Despite the simplicity of null model it closely predicted the mutational targets in  
354 SBW25 with equal rates for WspF, WspA and WspE and rare mutations in WspC and  
355 WspR, suggesting that it is a useful null model also for other species (Lind, et al.  
356 2018).

357

#### 358 **Prediction of specific mutational targets and effects of mutations**

359 The level of parallelism at the nucleotide level between species is expected to be  
360 dependent both on the number of possible mutations to WS and the degree of  
361 functional conservation of the proteins involved that define the genotype-to-  
362 phenotype map. Mutational hot spots are also expected to contribute to parallelism  
363 when they are conserved, but reduce parallelism when they are not. Based on previous  
364 analysis of patterns of mutations in SBW25 (McDonald, et al. 2009; McDonald, et al.  
365 2011; Lind, et al. 2018) and homology modeling of protein structure using Phyre2  
366 (Kelley, et al. 2015) regions expected to be mutated were predicted and the likely  
367 molecular consequences of different mutations suggested (Figure 4).

368

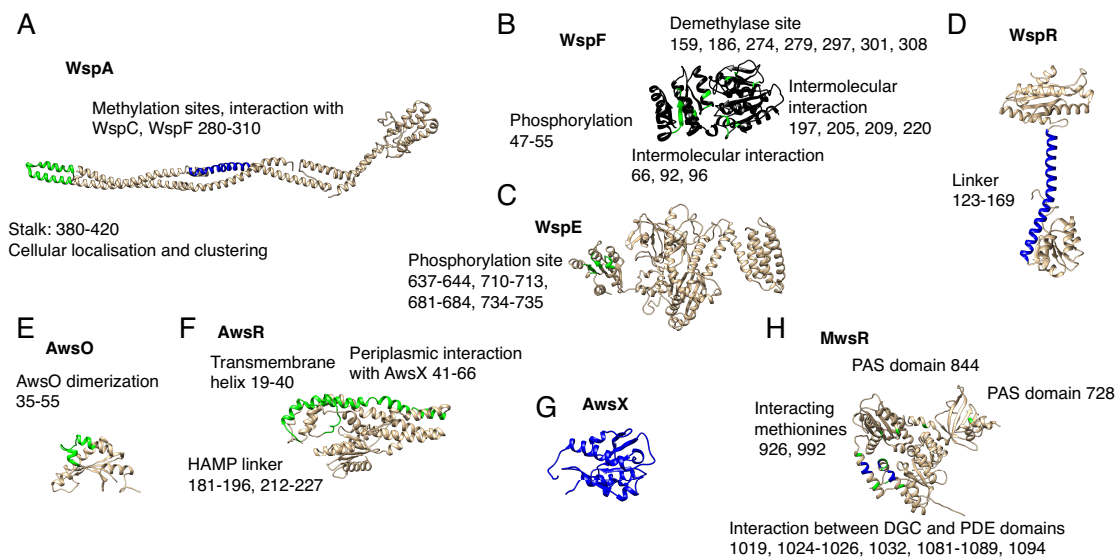

369

370 **Figure 4.** Predicted mutational targets and proposed molecular effects. Black  
 371 represents any inactivating mutation including frame shifts, blue represents in frame  
 372 inactivating mutations, green represents amino acid substitutions. Numbers in  
 373 brackets refers to amino acid residue numbers in SBW25 (A) WspA – amino acid  
 374 substitutions are expected at the tip of the stalk and in-frame deletion of methylation  
 375 sites (B) WspF – any inactivating mutation is predicted, amino acid substitutions are  
 376 predicted only in areas where they disrupt intermolecular interactions (C) WspE –  
 377 amino acid substitutions are predicted near the phosphorylation site (D) WspR – small  
 378 in frame deletion and amino acid substitutions in the linker is predicted to cause  
 379 constitutive activation (E) AwsO – amino acid substitutions disrupting AwsO  
 380 dimerization is predicted to lead to increased binding to AwsX without the presence  
 381 of an activating signal (F) AwsR - amino acid substitutions in the periplasmic region  
 382 or transmembrane helix that disrupt the interaction with AwsX or to the HAMP linker  
 383 is predicted (G) AwsX – any inactivating mutation that keep the reading frame intact  
 384 and do not interfere with expression of downstream AwsR is predicted (H) MwsR –  
 385 mutations are predicted in the interface between the DGC and phosphodiesterase  
 386 domains and in the most C-terminal of the PAS domains resulting in constitutive  
 387 activation.

388

### 389 Prediction of fitness effects of WS mutations

390 While conservation of relative fitness of different phenotypic variants might be  
 391 expected there is no clear reason to expect that the relative fitness of different DCG  
 392 pathways and mutations will be conserved between species. Despite this difficulty

393 there might be a way forward to predict the relative fitness of a large range of  
394 mutations with limited experimental data. The distribution of fitness effects of new  
395 mutations have been found to be bimodal for a large number of genes with different  
396 functions with one mode close to neutrality and one corresponding to a complete loss  
397 of a particular molecular function (Jacquier, et al. 2013; Jimenez, et al. 2013;  
398 Firnberg, et al. 2014; Lind, et al. 2017a; Lundin, et al. 2017). Given that mutations  
399 that allow colonization of the air-liquid interface have large phenotypic effects and  
400 are believed to also have large effects on molecular function, often a complete  
401 disruption of an interaction, adaptive mutations in the same region of a protein are  
402 likely to have similar fitness effects. Thus, an approximation of the distribution of  
403 fitness effects could be possible with relative few mutations for each gene. This is  
404 supported by the relatively small number of WS mutants in SBW25 that have been  
405 characterized with sensitive fitness assays and where mutations in the same gene  
406 typically have similar fitness effects (Lind, et al. 2015; Lind, et al. 2018). If this  
407 assumption is true the distribution of beneficial fitness effects is not continuous and  
408 the most advantageous mutations are not predicted to be equally spread between  
409 pathways or genes. Thus the prediction would be that mutants isolated after  
410 experimental evolution were concentrated to certain genes even if the mutational rate  
411 is similar so that although the prediction from the null model is equal number of  
412 mutations for WspA, WspE and WspF such distribution is unlikely to be found. While  
413 the mutation rates to WS for the three genes are similar in SBW25, WspA mutants are  
414 rarely found after experimental evolution due to their lower fitness (McDonald, et al.  
415 2009; Lind, et al. 2018). There is however no reason to expect that the relative fitness  
416 of mutations in different genes or pathways will be conserved between species.

417  
418 Inactivating mutations in *fuzY* and *nlpD* producing the alternative adaptive  
419 phenotypes based on LPS modification or cell chaining were also found to have  
420 similar fitness (Ferguson, et al. 2013; Farr 2015). Possibly there are other genes that  
421 can be mutated with similar phenotypes, but that those mutants have lower fitness and  
422 are outcompeted in SBW25. If relative fitness is not conserved between species this  
423 could lead to high convergence on the phenotypic level but with completely different  
424 genetic bases.

425

426 **Experimental test of forecasts in *P. protegens* Pf-5**

427 In order to test the predictions outlined above, *P. protegens* Pf-5 was used for a  
428 parallel experimental evolution study under static conditions. Its genome encodes  
429 homologs of all except one of the DGCs used in SBW25 including all the three  
430 common pathways to WS (Wsp, Aws, Mws). Thus the genetic predictions in terms of  
431 types of mutations and mutated genes are nearly identical to SBW25 and the  
432 mathematical null models can be directly applied. However Pf-5 lacks genes for  
433 biosynthesis of cellulose meaning that if c-di-GMP overproduction is the main  
434 pathway used, as predicted, an alternative EPS component must be utilized. The  
435 experimental conditions were modified to test the robustness of predictions to changes  
436 in media composition, temperature and cell wall material compared to those used in  
437 the original SBW25 system (Materials and Methods). After experimental evolution  
438 for five days, dilutions were spread on agar plates and then screened for colonies with  
439 divergent colony morphology, characteristic of many phenotypes that colonize the air-  
440 liquid interface.

441

442 In total 43 independent mutants were isolated and the causal mutations were  
443 identified (Figure 5, Figure 5 – supporting data). As predicted by the null model the  
444 majority (40/43) of mutations were associated with the Wsp, Aws, and Mws pathways  
445 that are subject to negative regulation (Figure 1D). In addition the prediction that  
446 promoter mutations would be the second most common type of mutation was  
447 successful with two mutations found upstream of the *aws* operon, which were  
448 predicted to disrupt the terminator of a high expression ribosomal RNA operon  
449 representing a promoter capture event. Promoter mutations were also found upstream  
450 of PFL\_3078, which is the first gene of a putative EPS locus (PFL\_3078-3093) that  
451 has not previously been described and that is only present in closely related strains.  
452 The operon encodes genes typical of exopolysaccharide biosynthetic operons making  
453 it highly likely it encodes the main structural component used by these mutants.



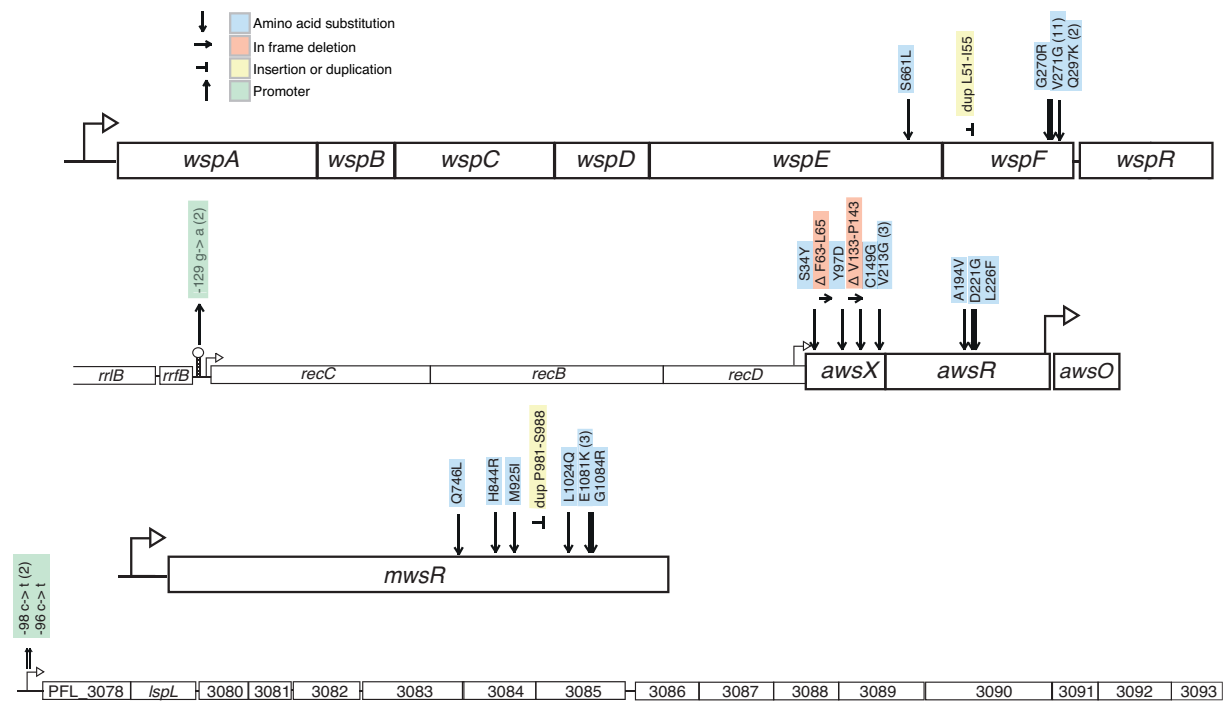

454

455 **Figure 5.** 43 independent mutants of *Pseudomonas protegens* Pf-5 were isolated after  
 456 experimental evolution based on their divergent colony morphology and mutations  
 457 were identified in four operons. Numbers in brackets are the number of independent  
 458 mutants found. Details are available in Figure 5 – source data.

459

460 The mathematical null model (Figure 2E) successfully predicted that of the three  
 461 common pathways to WS, Wsp would be the most common one (16 mutants)  
 462 followed by Aws (14) and then Mws (10). Mutations were predominately found in the  
 463 negative regulators WspF (15 mutants) or AwsX (9), but also in interacting proteins  
 464 WspE (1) and AwsR (3). Given that the mutational target size is estimated to be  
 465 smaller for the interacting proteins (Figure 4) this is not surprising. No mutations  
 466 were found in WspA despite a predicted high rate.

467

468 Mutations were predominantly found in predicted regions (Figure 4) for WspF,  
 469 WspE, AwsX, AwsR and MwsR, but in most cases they were not identical to those in  
 470 SBW25 (Figure 5 – supporting data). A mutational hot spot was apparent in WspF  
 471 with 12 out of 15 mutations being identical V271G missense mutations. The  
 472 previously described mutational hot spots in SBW25 in the *awsX* and *mwsR* genes  
 473 (Lind, et al. 2018) appeared absent, demonstrating how mutation rate differences can  
 474 skew evolutionary outcomes even for closely related species with similar genetic  
 475 architecture.

476

477 In total 60 wells were inoculated and subjected to experimental evolution for five  
 478 days after which air-liquid interface colonization was observed for the majority of the  
 479 wells. Mutants with clearly visible changes in colony morphology were isolated from  
 480 43 wells. Typically a single type of divergent colonies was observed and one colony  
 481 for each well was selected for further characterization at random based on a pre-  
 482 determined position on the agar plate. Representative mutations were reconstructed  
 483 using an allelic exchange protocol to determine that the mutations are the sole cause  
 484 of the air-liquid interface colonization and colony phenotypes and to exclude the  
 485 influence of secondary mutations (Figure 6A) before further characterization.

486

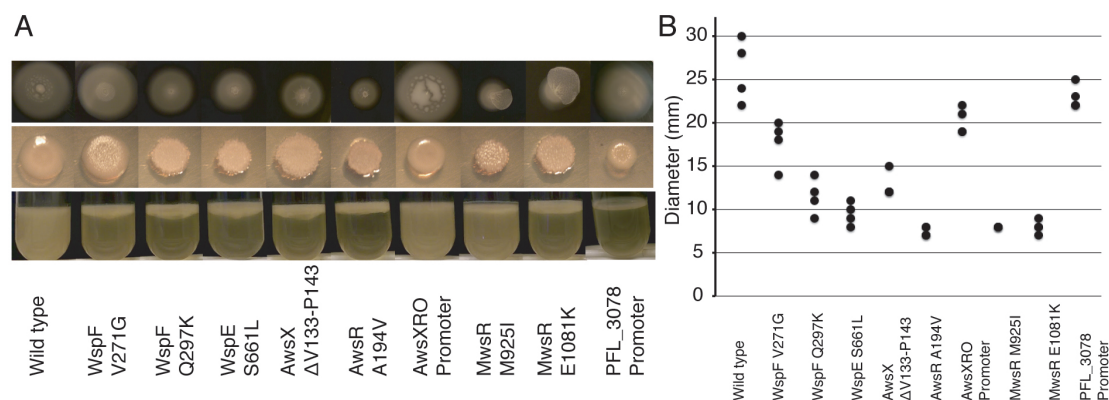

487

488 **Figure 6.** Phenotypic characterization of reconstructed mutants in WspF (V271G,  
 489 Q297K), WspE (S661L), AwsX (deletion V133-P143), AwsR (A194V), MwsR  
 490 (M925I, E1081K) and upstream *awsXRO* (*recC* -129 g->a) and PFL\_3078 (-98 c->t)  
 491 (A) Motility, colony morphology and air-liquid interface colonization (B) Motility  
 492 assay. As expected if the c-di-GMP network is activated motility was reduced for  
 493 most mutants with the exception of PFL\_3078 that is not expected to have increased  
 494 c-di-GMP levels.

495

496 The lack of cellulose biosynthetic genes also shows that these ecotypes can evolve by  
 497 different phenotypes than in SBW25. Increased Congo Red binding ability suggests  
 498 than alternative EPS components are used. Two clearly different phenotypes were  
 499 observed with one very similar to the original WS types in SBW25 with a clear  
 500 motility defect and mutations in the Wsp, Aws and Mws pathways (Figure 6A, 6B).  
 501 The other type was less wrinkly, had similar motility as the wild type and promoter  
 502 mutations upstream of the PFL\_3078-3093 operon (Figure 6A, 6B).

503

504 Two types of fitness assays were performed, similarly as previously described (Lind,  
505 et al. 2015) to measure differences in fitness between the different DGC mutants and  
506 the alternative phenotypic solution with the mutation upstream of PFL\_3078. The first  
507 assay measures “invasion fitness” where the mutant is allowed to invade a wild type  
508 population from an initial frequency of 1%. This confirms that the mutations are  
509 adaptive and that mutants can colonize the air-liquid interface. The invasion assays  
510 showed that all reconstructed mutants could rapidly invade an ancestral wild type  
511 population (Figure 7A, Figure 7 – source data). Although there were significant  
512 differences between selection coefficients of the mutants (one-way ANOVA  $p <$   
513  $0.0001$ ), no mutant was significantly different from the most common mutant (WspF  
514 V271G, two-tailed t-test  $P > 0.01$ ).

515

516 The second fitness assay measures “competition fitness” and here each mutant is  
517 instead mixed 1:1 with the most common WS type (WspF V271G) at the start of the  
518 competition. The competition assay showed that the ancestral wild type was rapidly  
519 outcompeted by the mutants also at a 1:1 initial ratio (Figure 7B). There was  
520 significant variation in fitness between the WS mutants (one-way ANOVA  $P <$   
521  $0.0001$ ) and the AwsX had significantly lower selection coefficient (two-tailed t-test  $P$   
522  $< 0.009$ ) compared to the reference WspF V271G and one of the MwsR mutants  
523 (E1081K) had significantly higher selection coefficient (two-tailed t-test  $P < 0.003$ ).  
524 The alternative phenotypic solution used by the PFL\_3078 promoter mutant resulted  
525 in the lowest fitness ( $s = -0.1$ , two-tailed t-test  $p < 0.005$ ) meaning that it is expected  
526 to be rapidly outcompeted by the WS mutants (Figure 7B).

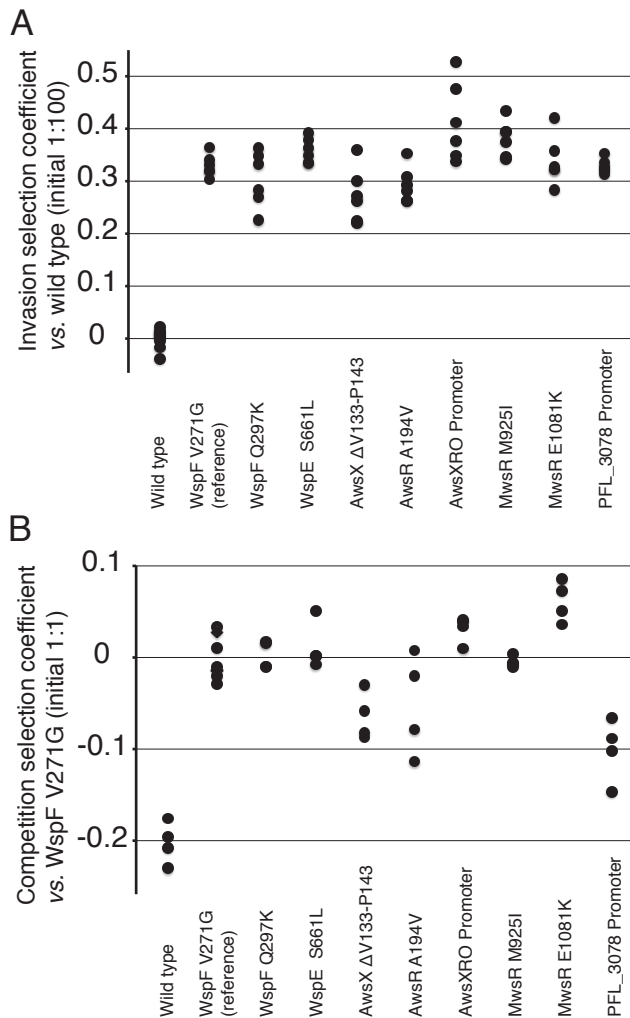

527

528 **Figure 7.** Fitness of reconstructed *P. protegens* Pf-5 WS mutants was measured in  
 529 pairwise competitions. **(A)** Invasion fitness was measured relative a dominant  
 530 ancestral wild type strain with a 1:100 initial ratio to show that mutations were  
 531 adaptive and that they can increase from rare to colonize the air-liquid interface. Six  
 532 independent competitions were performed for each pair. **(B)** Competition fitness was  
 533 measured relative the most common WS mutant (WspF V271G) in a 1:1 initial ratio  
 534 to compare the fitness of different WS mutants and the alternative phenotypic  
 535 solution. Four independent competitions were performed for each pair.

536

537 SBW25 WS mutants use cellulose as the main structural component, but even though  
 538 there is high parallelism at the genetic level for Pf-5 WS mutants this cannot be the  
 539 case at the phenotypic level as its genome does not encode genes for cellulose  
 540 biosynthesis. Given that production of Pel exopolysaccharide has been shown to be  
 541 induced by mutations in *wspF* in *P. aeruginosa* (Hickman, et al. 2005) and that Pel in  
 542 this species is required for pellicle formation under static growth (Friedman and

543 Kolter 2004) this was predicted to be the main structural component used by Pf-5. To  
544 test this prediction the *pel* operon (PFL\_2972-PFL\_2978) was deleted from Pf-5 and  
545 combined with previously characterized WS mutations and fitness was measured.  
546 Both invasion fitness (Figure 8A) and competition fitness (Figure 8B) was  
547 significantly lower (two-tailed t-tests  $p < 0.01$ ) compared to isogenic strains with an  
548 intact *pel* operon (Figure 7A, 7B) except invasion fitness for the AwsX mutant (two-  
549 tailed t-tests  $p < 0.08$ , one outlier). This suggests that Pel polysaccharide serves as an  
550 important structural component for colonizing the air-liquid interface and that its  
551 production is activated by mutations leading to increased c-di-GMP levels. Although  
552 deletion of *pel* in WS mutants resulted in less wrinkly colony morphology it did not  
553 result in a smooth ancestral type. Neither did deletion of *pel* abolish the ability to  
554 colonize the air liquid interface (Figure 8C) or the ability to invade wild type  
555 populations (Figure 8A). This suggests that production of an additional EPS  
556 component is induced by increased c-di-GMP levels caused by mutations in Wsp,  
557 Aws and Mws, at least in the absence of *pel*. As expected if the motility defect  
558 observed for WS mutants are primarily caused by high c-di-GMP levels rather than  
559 high production of Pel, the motility was also reduced for Wsp, Aws and Mws mutants  
560 with the *pel* operon deleted (Figure 8D).  
561

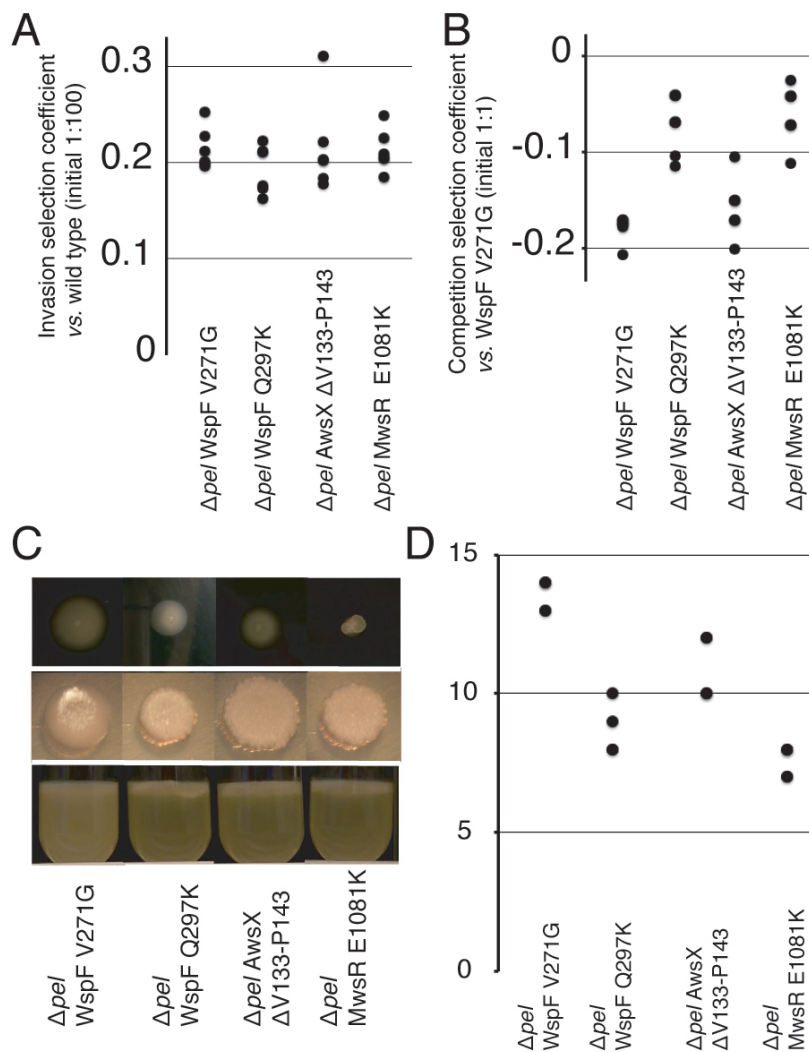

562

563 **Fig 8. Contribution of *pel* to WS phenotype and fitness (A).** Deletion of *pel* in WS  
 564 mutants reduces invasion fitness. Fitness of reconstructed *P. protegens* Pf-5 WS  
 565 mutants without the *pel* operon was measured in pairwise competitions. Invasion  
 566 fitness was measured relative a dominant ancestral wild type strain with a 1:100 initial  
 567 ratio. Six independent competitions were performed for each pair. **(B)** Deletion of *pel*  
 568 in WS mutants reduces competition fitness. Competition fitness was measured  
 569 relative the most common WS mutant (WspF V271G) in a 1:1 initial ratio. Four  
 570 independent competitions were performed for each pair. **(C)** Deletion of *pel* in WS  
 571 mutants did not result in ancestral smooth colony morphology or loss of ability to  
 572 colonize the air-liquid interface suggesting a secondary EPS component is produced.  
 573 **(D).** Deletion of *pel* did not restore motility showing that Pel overproduction is not the  
 574 cause of the motility defect in WS mutants.

575

## 576 **Discussion**

577 The extension of the *P. fluorescens* SBW25 experimental evolution system to related  
578 species shows promise for true testing of evolutionary forecasting models. While  
579 there is a diversity of DGCs and EPSs between species leading to differences in  
580 forecasts, the conserved role of c-di-GMP and limited number of phenotypes allow  
581 the use of previous data to improve predictions and makes the experimental system  
582 robust to changes in environmental conditions. The test of initial forecasts for *P.*  
583 *protegens* Pf-5 presented here provides support for the ability to predict some aspects  
584 of both genetic and phenotypic evolution while recognizing that the probability of  
585 specific mutations cannot in most cases be predicted.

586

587 That experimental populations of *Pseudomonas* will colonize the air-liquid interface  
588 when incubated under static condition is a prerequisite of extending the model. Given  
589 that a range of phenotypic solutions is predicted to be available for all species the  
590 evolution of such mutants for *P. protegens* is not surprising. The specific  
591 environmental conditions used for experimental evolution often have a major impact  
592 on evolutionary outcomes and is also likely to influence relative fitness and possibly  
593 mutational biases also in the WS system. However despite major changes in growth  
594 medium, temperature and material and physical dimensions of the growth vessel,  
595 predictions on both the genetic and phenotypic levels proved successful  
596 demonstrating robustness to environmental change and the establishment of a  
597 dominant selective pressure, i.e. access to oxygen solved by air-liquid interface  
598 colonization.

599

600 Phenotypic predictions of the structural basis supporting air-liquid colonization is  
601 challenging given the limited previous experimental data. For SBW25 cellulose-based  
602 solutions are superior in fitness, but for Pf-5 this solution is not available. The  
603 prediction that overproduction of structural exopolysaccharides, rather than fuzzy,  
604 cell-chaining or mucoid types, would be the primary solution was successful. One of  
605 the two phenotypes found here used the Pel EPS, which could be predicted based on  
606 its role in *P. aeruginosa*. However it appears to use a secondary EPS as well, that  
607 remains to be identified, given that mutants lacking Pel but with activated DGCs still  
608 colonize the air-liquid interface and have a distinct colony morphology. The second

609 phenotype used another EPS, encoded by PFL\_3078-3093, which had not previously  
610 be described and given that several EPS loci are usually encoded in *Pseudomonas*  
611 genomes its use could not be predicted. However, repeating experimental evolution  
612 using other *Pseudomonas* species is likely to provide more information about which  
613 EPSs can be used to colonize the air-liquid interface and their relative fitness to allow  
614 improved phenotypic predictions. Deletion of the *pel* operon, the unidentified  
615 secondary EPS and PFL\_3078-3093 and subsequent experimental evolution could  
616 reveal less fit phenotypic solutions that are expected to exist including fuzzy types  
617 caused by defects in LPS modification, cell-chaining types with defects in cell  
618 division, adhesive proteins or mucoid types using alginate or levan, two EPSs with  
619 lower structural stability.

620

621 The general prediction of types of mutations, as described in the hierarchy in Figure  
622 2D, was also successful although the relatively few mutants identified here did not  
623 allow for detection of rare activating mutations or double inactivating mutations. The  
624 existence of such types could be confirmed by deletion of the main pathways (Wsp,  
625 Aws, and Mws) followed by experimental evolution as previously described for  
626 SBW25 (Lind, et al. 2015). The majority of mutations were loss-of-function  
627 mutations in negative regulators or interacting proteins followed by less common  
628 promoter mutations and promoter captures. In contrast to SBW25, where all promoter  
629 mutations resulted in up-regulation of DGCs, the mutation upstream of PFL3078-  
630 3093 demonstrates the possibility of direct transcriptional activation of EPS  
631 components that are not under post-translational control of c-di-GMP. Two identical  
632 mutations were found over 9 kb upstream of the *aws* operon, in between a ribosomal  
633 RNA operon and the *recCBD* operon, which encodes key genes for recombination.  
634 The molecular effects of these mutations have not been further investigated, but the  
635 resulting WS phenotype is dependent of the presence of the *aws* operon, deletion of  
636 which reversed the phenotype. This is consistent with an up-regulation of c-di-GMP  
637 by AwsR presumably caused by increased transcription. The mutation is located in  
638 the predicted terminator of the ribosomal RNA operon and increased transcriptional  
639 read-through could put the *aws* operon under control of a very strong *rrn* promoter  
640 that is most highly transcribed during exponential growth. This could explain the  
641 relatively mild colony morphology phenotype as well as high motility of this WS  
642 mutant (Figure 6).



643

644 The mathematical null model (Lind, et al. 2018) successfully predicted that Wsp  
645 would be the most commonly used pathway followed by Aws, and Mws the most  
646 rare. However, the number of mutants isolated here is rather small and the high  
647 frequency of Wsp mutants seems mainly to be caused by a mutational hot spot in  
648 *wspF*. Still the prediction that the three pathways together would contribute the large  
649 majority of adaptive mutations (40 out of 43) is not trivial given that in SBW25 at  
650 least 13 additional pathways are available to the high fitness WS phenotype (Lind, et  
651 al. 2015). It is also worth noting that direct use of mutation rate data from SBW25  
652 (Lind, et al. 2018) would result in poorer predictions than the mathematical null  
653 model due to a strong mutational hot spot in *awsX* in that species.

654

655 For the multi-protein pathways Wsp and Aws, the null model predicted (Figure 2E)  
656 that mutations would primarily be found in WspA, WspE, WspF, AwsX and AwsR.  
657 Mutations were detected in all these except in WspA and the majority was found in  
658 the negative regulators WspF and AwsX. WspA mutations were not found in the  
659 original study in SBW25 either (McDonald, et al. 2009), but this was shown to be due  
660 to lower fitness relative WspF and WspE mutants rather than a lower mutation rate to  
661 WS (Lind, et al. 2018). Possibly this explains the absence of WspA mutants here as  
662 well, but it is not clear if this fitness difference would be conserved in other species or  
663 if sometimes WspA mutants are more fit. Thus the null model prediction of equal  
664 rates for WspA, WspF and WspE is not changed for future experimental tests.

665

666 The molecular effects of the mutations found here are unknown, but knowledge from  
667 SBW25 and *P. aeruginosa* and their positions in protein structure allowed some  
668 predictions to be made. Inactivating mutations in the negative regulator WspF were  
669 predicted to be either indels or missense mutations in four specific regions. Mutations  
670 were found in two of the predicted regions, one in the vicinity to the methylesterase  
671 active site where mutations are predicted to cause large disruptions in protein  
672 structure and the other one directly disrupting the phosphorylation active site in the  
673 signal receiver domain. No mutations were found in the surface exposed regions  
674 hypothesized to be involved in interactions with WspA and WspE, which could be  
675 due to differences in function between SBW25 and Pf-5 or simply that they appear at  
676 lower frequency and would be detected if additional mutations were isolated. The sole

677 mutation in WspE is, as predicted, located in the direct vicinity of the phosphorylation  
678 active site. Mutations in AwsX were amino acid substitutions throughout the gene as  
679 well as in frame deletions inactivating the gene as predicted. Mutations in AwsR and  
680 MwsR were also found in predicted regions, but no mutations were found in the  
681 periplasmic region of AwsR, which is the most commonly targeted region in SBW25.  
682 Known mutational hot spots in *awsX*, *awsR* and *mwsR* in SBW25 (Lind, et al. 2018)  
683 were not conserved in Pf-5 resulting in divergent spectra of mutations, while mutated  
684 regions and predicted functional effects remain conserved between the two species.

685

686 The diversity of phenotypic solutions observed after experimental evolution is  
687 dependent on fitness differences between the phenotypes, but also on the rate of  
688 which phenotypes are introduced by mutations, which is dependent on the genetic  
689 architecture underlying the trait as well as mutational biases. The Pf-5 strain has at  
690 least three DGC pathways (Wsp, Aws and Mws) that are subject to negative  
691 regulation leading to prediction of a high rate of WS mutants, which are then expected  
692 to outcompete other phenotypic solutions. If instead only one of these pathways were  
693 present, a larger diversity of phenotypes would be expected to be observed with  
694 relative fitness becoming less important as the first mutant that gains a foothold at the  
695 air-liquid interface will have a large advantage and priority effects, i.e. being first,  
696 will increasingly determine which adaptive mutants are observed.

697

698 Given that the mutational target upstream of PFL\_3078-3093 is likely be relatively  
699 small and that these mutants are rapidly outcompeted by all WS types tested, their  
700 relatively high frequency (3/43) is unexpected. Possibly this is due to a higher  
701 mutation rate at these sites (Sankar, et al. 2016) or that population structure limits  
702 direct competition between these different phenotypes and reduces the importance of  
703 relative fitness. In SBW25 low fitness phenotypes that colonize the air-liquid  
704 interface based on LPS modification or cell-chaining are observed prior to the rise of  
705 WS to high frequencies (Lind, et al. 2017b) due to the presence of mutational hot  
706 spots in these genes which make these mutants appear early during the growth phase  
707 despite their relatively small mutational targets (Ferguson, et al. 2013; Farr 2015;  
708 Lind, et al. 2017b).

709

710 In successfully predicting evolutionary outcomes in *P. protegens*, this work lays the  
711 foundation for future tests of evolutionary forecasting in related *Pseudomonas* species  
712 by clearly stating predictions on several different levels from phenotype down to  
713 which specific regions of proteins are likely to be mutated. Given what is already  
714 known about the effects of (for now) unpredictable mutational biases and differences  
715 in fitness between different WS types many of the forecasts will inevitably fail.  
716 However hopefully they will fail in interesting ways thereby revealing erroneous  
717 assumptions. The ability to remove common genetic and phenotypic pathways  
718 provides a unique opportunity to also find those pathways that evolution does not  
719 commonly use. This is necessary to determine why forecasts fail and update the  
720 predictive models for the next cycle of prediction, experimental evolution and mutant  
721 characterization to define the information necessary to predict short-term evolutionary  
722 processes.

723

## 724 **Materials and methods**

725

### 726 **Strains and media**

727 *Pseudomonas protegens* Pf-5 (previously known as *P. fluorescens* Pf-5) and  
728 derivatives thereof were used for all experimental evolution and phenotypic  
729 characterization. *E. coli* DH5 $\alpha$  was used for cloning PCR fragments for genetic  
730 engineering (Paulsen et al). *P. protegens* Pf-5 was grown in tryptic soy broth  
731 (Tryptone 17g, Soytone 3g, Glucose 2.5g, NaCl 5g, K<sub>2</sub>HPO<sub>4</sub> 2.5g per liter)  
732 supplemented with 10 mM MgSO<sub>4</sub> and 0.2% glycerol (TSBGM) for experimental  
733 evolution and fitness assays. Lysogeny broth (LB) was used during genetic  
734 engineering and LB without NaCl and supplemented with 8% sucrose was used for  
735 counter-selection of *sacB* marker. Solid media were 1.5% agar added to LB or TSB  
736 supplemented with 10 mM MgSO<sub>4</sub>, 0.2% glycerol and 10 mg/l Congo red. Motility  
737 assays were conducted in 0.3% agar TSB supplemented with 10 mM MgSO<sub>4</sub>, 0.2%  
738 glycerol. Kanamycin was used at 50 mg/l for *E. coli* or 80 mg/l for *P. protegens* and  
739 gentamicin at 10 mg/l for *E. coli* or 15 mg/L for *P. protegens*. Selection plates for  
740 cloning contained 5-Bromo-4-Chloro-3-Indolyl  $\beta$ -D-Galactopyranoside (X-gal) at 40  
741 mg/l. 100 mg/L nitrofurantoin was used to inhibit growth of *E. coli* donor cells after  
742 conjugation. All strains were stored at -80°C in LB with 10% DMSO.

743

#### 744 **Experimental evolution**

745 30 central wells of a deep well plate (polypropylene, 1.1 mL, round walls, Axygen  
746 Corning Life Sciences) were inoculated with approximately  $10^3$  cells each and  
747 incubated at 36°C for 5 days without shaking on two different occasions. Suitable  
748 dilutions were plated on TSBGM plates with Congo red after 5 days and incubated at  
749 36°C for 48 h. Plates were screened for colonies with a visible difference in colony  
750 morphology and one divergent colony per well were randomly selected based only on  
751 its position on the agar plate. In total 43 independent mutants were streaked for single  
752 cells twice before overnight growth in LB and freezing.

753

#### 754 **Genome sequencing**

755 Seven mutant strains that did not contain mutations in the *wspF* and *awsX* genes were  
756 analyzed by genome resequencing. The strains had mutations in *awsR*, *mwsR*, *wspE*,  
757 upstream PFL\_3078 (2 strains) and in the intergenic region between *rrfB* and *recC*  
758 upstream of the *awsXRO* operon. Genomic DNA was isolated with Genomic DNA  
759 Purification Kit (Thermo Fisher). Sequencing libraries were prepared from 1µg DNA  
760 using the TruSeq PCRfree DNA sample preparation kit (cat# FC- 121-3001/3002,  
761 Illumina Inc.) targeting an insert size of 350bp. The library preparation was  
762 performed according to the manufacturers' instructions (guide#15036187).  
763 Sequencing was performed with MiSeq (Illumina Inc.) paired-end 300bp read length  
764 and v3 sequencing chemistry.

765

766 Sequencing was performed by the SNP&SEQ Technology Platform in Uppsala. The  
767 facility is part of the National Genomics Infrastructure (NGI) Sweden and Science for  
768 Life Laboratory. The SNP&SEQ Platform is also supported by the Swedish Research  
769 Council and the Knut and Alice Wallenberg Foundation. Sequencing data were  
770 analyzed with using Geneious v. 10.2.3 with reads assembled against the *P. protegens*  
771 Pf-5 genome sequence (CP000076.1).

772

#### 773 **Sanger sequencing**

774 Sanger sequencing were performed by GATC biotech and used to sequence candidate  
775 genes to find adaptive mutations and to confirm reconstructed mutations  
776 (oligonucleotide primer sequences are available in Table S3).

777

## 778 **Reconstruction of mutations**

779 Nine mutations representing all candidate genes found using Sanger or Illumina  
780 sequencing were reconstructed in the wild type ancestral *P. protegens* Pf-5 to show  
781 that they are the cause of the adaptive phenotype and to be able to assay their fitness  
782 effects without the risk of secondary mutations that might have occurred during  
783 experimental evolution. A two-step allelic replacement protocol was using to transfer  
784 the mutation into the ancestor. First a 1-2 kb fragment surrounding the putative  
785 adaptive mutations were amplified using PCR (Phusion High- Fidelity DNA  
786 polymerase, Thermo Scientific) and ligated into the multiple cloning site of the  
787 mobilizable pK18mobsac suicide plasmid (FJ437239) using standard molecular  
788 techniques. The ligation mix was then transformed into competent *E. coli* DH5 $\alpha$  using  
789 heat shock. After confirmation of correct insert size by PCR the plasmid was  
790 transferred to *P. protegens* Pf-5 by conjugation with the donor strain and an *E. coli*  
791 strain carrying the conjugation helper plasmid pRK2013. Cultures were grown  
792 overnight of the recipient *P. protegens* Pf-5 (20 ml per conjugation at 30°C in LB)  
793 and 2 ml each of the donor and helper *E. coli* strains per conjugation at 37°C in LB  
794 with kanamycin. The culture of *P. protegens* Pf-5 was heat shocked for 10 minutes at  
795 42°C prior to centrifugation at 4000 rpm for 10 minutes and resuspension in a small  
796 volume of LB. Donor and helper cells were collected by centrifugation 4000 rpm for  
797 10 minutes, resuspended in LB, and mixed with the concentrated recipient cells. After  
798 another round of centrifugation the conjugation mix was resuspended in 50  $\mu$ l LB and  
799 spread onto several spots on a LA plate followed by incubation overnight at 30°C.  
800 Each spot of the conjugation mix was scraped of the plate and resuspended in 200  $\mu$ l  
801 LB each and plated on LA plates with kanamycin, to select for transfer of the plasmid,  
802 and nitrofurantoin that prevents growth of the *E. coli* donor and helper cells. The  
803 pK18mobsac plasmid has a pBR322 type origin and cannot replicate in *P. protegens*  
804 Pf-5 and only cells where the plasmid has integrated into the chromosome by  
805 homologous recombination, with the homology provided by the cloned fragment, can  
806 grow in the presence of kanamycin. After streaking for single cells on LA plates with  
807 kanamycin, the *P. protegens* Pf-5 strains with integrated plasmids were grown  
808 overnight in LB at 30°C without antibiotics to allow for double crossover  
809 homologous recombination resulting in loss of the integrated plasmid. The plasmid

810 also contains the *sacB* marker conferring sucrose sensitivity, which allows for  
811 counter-selection by plating on LA plates with sucrose. Sucrose resistant colonies  
812 were checked for loss of the kanamycin marker and DNA sequencing of the cloned  
813 region to find strains with the reconstructed mutation and no other mutations.  
814 Deletion of the *pelABCDEFGHIJ* (PFL\_2972-PFL\_2978) region was accomplished using  
815 the same two-step allelic exchange protocol using SOE-PCR to generated at fragment  
816 surrounding the *pel* operon as previously described (Ferguson, et al. 2013; Farr 2015;  
817 Lind, et al. 2017b). All oligonucleotide primer sequences are available in Table S3.

818

### 819 **Fitness assays**

820 Two types of competition fitness assays were performed similarly to previously  
821 described (Ferguson, et al. 2013; Farr 2015; Lind, et al. 2015). The first assay  
822 measures invasion fitness, where a mutant is mixed 1:100 with the wild type ancestor,  
823 simulating early stages of air-liquid interface colonization where a rare mutant  
824 establishes and grows at the surface with no competition from other mutants. The  
825 second assay instead measures competition fitness in a 1:1 competition against a  
826 reference mutant strain, which here was chosen to be the WspF V271G mutant  
827 because it was the most commonly found in the experimental evolution study and thus  
828 is highly successful either because of a high rate of emergence, i.e. a mutational hot  
829 spot, or higher fitness than most other WS mutants. In addition, the WspF V271G  
830 mutant has a temperature sensitive colony morphology phenotype in that it is highly  
831 wrinkly at 30°C, but only have a very mild phenotype when grown at room  
832 temperature, thus allowing it to be distinguishable from both the smooth ancestor and  
833 all other wrinkly mutants isolated here.

834

835 Fluorescent reference strains of the wild type ancestor and the WspF V271G mutants  
836 were created using a miniTn7 transposon (miniTn7(Gm) PA1/04/03 Gfp.AAV-a)  
837 (Lambertsen, et al. 2004) that allows integration at a defined locus (*attTn7*) in the  
838 chromosome. This allows the colonies to be distinguished not only by morphology  
839 but also by fluorescence under blue/UV light and gentamicin resistance, which  
840 provides a way to ascertain that secondary adaptive mutants that might occur during  
841 the competition experiment do not bias the results (for example the ancestor could  
842 evolve WS types or a WS mutant can evolve to cheat on the other type by inactivation  
843 of EPS production or reduced c-di-GMP signalling). Introduction of the transposon

844 into *P. protegens* Pf-5 was performed by tri-parental conjugation from *E. coli* with  
845 helper plasmids pRK2013 (conjugation helper) and pUX-BF13 containing the  
846 transposase genes) using the same conjugation protocol described above.

847

848 The invasion assay was performed by mixing shaken overnight cultures of the  
849 competitor 1:100 with the GFP-labeled reference ancestor followed by 1000-fold  
850 dilution and static incubation at 36°C for 48 h in TBSGM medium in deep well plates  
851 (1 ml per well, using only the central 60 wells). For the competition assay, the GFP-  
852 labeled reference strain WspF 271G was mixed 1:1 with the competitor and diluted 6-  
853 fold and grown for 4 h (shaken at 30°C), before plating to determine initial ratios, to  
854 ensure the cells were in a similar physiological state at the start of the competition.

855 The competition cultures were then diluted 1000-fold in TBSGM medium and grown  
856 in deep well plates (1 ml per well, using only the central 60 wells) static for 24 h at  
857 36°C. Selection coefficients ( $s$ ) were calculated as previously described (Dykhuizen  
858 1990), where  $s = 0$  is equal fitness, positive is increased fitness and negative is  
859 decreased fitness relative to the reference strain. Briefly  $s$  is calculated as the change  
860 in logarithmic ratio over time according to  $s = [\ln(R(t)/R(0))]/[t]$ , where  $R$  is the ratio  
861 of mutant to reference and  $t$  is the number of generations of the entire population  
862 during the experiment (estimated from viable counts). The cost of the fluorescent  
863 marker were calculated from control competitions where the GFP-labeled reference  
864 strains (wild type and WspF V271G) were competed against isogenic strains without  
865 the marker and included in each plate under identical conditions during the fitness  
866 assays and used to adjust the selection coefficients to compensate for the cost.

867

### 868 **Motility assays**

869 Swimming motility assays were performed in TBSGM plates with 0.3% agar (BD)  
870 and the diameter was measured after 24 h of growth at room temperature. Each strain  
871 was assayed in duplicates on two different plates.

872

### 873 **Bioinformatics analysis of DGCs and EPS genes**

874 Homologs for all DGCs in *P. fluorescens* SBW25 were found using the *Pseudomonas*  
875 Ortholog Database at Pseudomonas.com (Winsor, et al. 2016). Blast-p searches for  
876 GGDEF domains were performed to find remaining DGCs in the six *Pseudomonas*

877 species and their homologs again found using the *Pseudomonas* Ortholog Database  
878 (Whiteside, et al. 2013) and manually inspected. Annotations (Pseudomonas.com. DB  
879 version 17.2) were also searched for diguanylate cyclase and GGDEF. Not all DCCs  
880 found are likely to have diguanylate cyclase activity, but given the difficulties of  
881 predicting which of the partly degenerate active sites are likely to be inactive  
882 combined with the possibilities of mutational activation during experimental  
883 evolution, none were excluded.

884

885 There is no simple way to find all genes that can function as structural or regulatory  
886 genes to allow colonization of the air-liquid interface. Thus the selection in Figure 3B  
887 and Figure 3 – source data should not be considered complete. Putative EPS genes  
888 were found using blastp searches with sequences from known exopolysaccharide  
889 biosynthesis proteins including cellulose, PGA, Pel, Psl, Pea, Peb, alginate and levan.  
890 Homologs were then found using the *Pseudomonas* Ortholog Database (Whiteside, et  
891 al. 2013) at Pseudomonas.com (Winsor, et al. 2016). Annotations (Pseudomonas.com.  
892 DB version 17.2) were also searched for glycosyltransferase, glycosyl transferase,  
893 flippase, polysaccharide, lipopolysaccharide, polymerase, biofilm, adhesion and  
894 adhesion. Based on previous work in SBW25 and literature searches a few additional  
895 genes were added.

896

## 897 **Acknowledgements**

898 This work was supported by grants from Carl Tryggers Foundation for Scientific  
899 Research and Magnus Bergvalls Foundation.

900

## 901 **Competing interests**

902 The author declares no competing interests.

## 903 **References**

904

- 905 Bantinaki E, Kassen R, Knight CG, Robinson Z, Spiers AJ, Rainey PB. 2007.  
906 Adaptive divergence in experimental populations of *Pseudomonas fluorescens*. III.  
907 Mutational origins of wrinkly spreader diversity. *Genetics* 176:441-453.  
908 <http://dx.doi.org/10.1534/genetics.106.069906>



- 909 Barrick JE, Lenski RE. 2013. Genome dynamics during experimental evolution.  
910 Nature reviews. Genetics 14:827-839. <http://dx.doi.org/10.1038/nrg3564>
- 911 Barrick JE, Yu DS, Yoon SH, Jeong H, Oh TK, Schneider D, Lenski RE, Kim JF.  
912 2009. Genome evolution and adaptation in a long-term experiment with  
913 *Escherichia coli*. Nature 461:1243-1247. <http://dx.doi.org/10.1038/nature08480>
- 914 Beaumont HJ, Gallie J, Kost C, Ferguson GC, Rainey PB. 2009. Experimental  
915 evolution of bet hedging. Nature 462:90-93. <http://dx.doi.org/10.1038/nature08504>
- 916 Blank D, Wolf L, Ackermann M, Silander OK. 2014. The predictability of molecular  
917 evolution during functional innovation. Proceedings of the National Academy of  
918 Sciences of the United States of America 111:3044-3049.  
919 <http://dx.doi.org/10.1073/pnas.1318797111>
- 920 Brandis G, Pietsch F, Alemayehu R, Hughes D. 2015. Comprehensive phenotypic  
921 characterization of rifampicin resistance mutations in *Salmonella* provides insight  
922 into the evolution of resistance in *Mycobacterium tuberculosis*. J Antimicrob  
923 Chemother 70:680-685. <http://dx.doi.org/10.1093/jac/dku434>
- 924 Conrad TM, Joyce AR, Applebee MK, Barrett CL, Xie B, Gao Y, Palsson BO. 2009.  
925 Whole-genome resequencing of *Escherichia coli* K-12 MG1655 undergoing short-  
926 term laboratory evolution in lactate minimal media reveals flexible selection of  
927 adaptive mutations. Genome biology 10:R118. <http://dx.doi.org/10.1186/gb-2009-10-10-r118>
- 929 Deatherage DE, Kepner JL, Bennett AF, Lenski RE, Barrick JE. 2017. Specificity of  
930 genome evolution in experimental populations of *Escherichia coli* evolved at  
931 different temperatures. Proceedings of the National Academy of Sciences of the  
932 United States of America 114:E1904-E1912.  
933 <http://dx.doi.org/10.1073/pnas.1616132114>
- 934 Dykhuizen DE. 1990. Experimental studies of natural selection in bacteria. Annu.  
935 Rev. Ecol. Syst. 21:373-398.
- 936 Farr AD. 2015. Formalist features determining the tempo and mode of evolution in  
937 *Pseudomonas fluorescens* SBW25. [[Auckland, New Zealand]: Massey University.

- 938 Farr AD, Remigi P, Rainey PB. 2017. Adaptive evolution by spontaneous domain  
939 fusion and protein relocation. *Nat Ecol Evol* 1:1562-1568.  
940 <http://dx.doi.org/10.1038/s41559-017-0283-7>
- 941 Ferguson GC, Bertels F, Rainey PB. 2013. Adaptive Divergence in Experimental  
942 Populations of *Pseudomonas fluorescens*. V. Insight into the Niche Specialist  
943 "Fuzzy Spreader" Compels Revision of the Model *Pseudomonas* Radiation.  
944 *Genetics*. <http://dx.doi.org/10.1534/genetics.113.154948>
- 945 Firnberg E, Labonte JW, Gray JJ, Ostermeier M. 2014. A comprehensive, high-  
946 resolution map of a gene's fitness landscape. *Molecular biology and evolution*  
947 31:1581-1592. <http://dx.doi.org/10.1093/molbev/msu081>
- 948 Fraebel DT, Mickalide H, Schnitkey D, Merritt J, Kuhlman TE, Kuehn S. 2017.  
949 Environment determines evolutionary trajectory in a constrained phenotypic space.  
950 *Elife* 6. <http://dx.doi.org/10.7554/eLife.24669>
- 951 Friedman L, Kolter R. 2004. Genes involved in matrix formation in *Pseudomonas*  
952 *aeruginosa* PA14 biofilms. *Mol Microbiol* 51:675-690.
- 953 Gallie J, Libby E, Bertels F, Remigi P, Jendresen CB, Ferguson GC, Desprat N,  
954 Buffing MF, Sauer U, Beaumont HJ, et al. 2015. Bistability in a metabolic network  
955 underpins the de novo evolution of colony switching in *Pseudomonas fluorescens*.  
956 *PLoS biology* 13:e1002109. <http://dx.doi.org/10.1371/journal.pbio.1002109>
- 957 Goymer P, Kahn SG, Malone JG, Gehrig SM, Spiers AJ, Rainey PB. 2006. Adaptive  
958 divergence in experimental populations of *Pseudomonas fluorescens*. II. Role of  
959 the GGDEF regulator WspR in evolution and development of the wrinkly spreader  
960 phenotype. *Genetics* 173:515-526. <http://dx.doi.org/10.1534/genetics.106.055863>
- 961 Herron MD, Doebeli M. 2013. Parallel evolutionary dynamics of adaptive  
962 diversification in *Escherichia coli*. *PLoS biology* 11:e1001490.  
963 <http://dx.doi.org/10.1371/journal.pbio.1001490>
- 964 Hickman JW, Tifrea DF, Harwood CS. 2005. A chemosensory system that regulates  
965 biofilm formation through modulation of cyclic diguanylate levels. *Proceedings of*  
966 *the National Academy of Sciences of the United States of America* 102:14422-  
967 14427. <http://dx.doi.org/10.1073/pnas.0507170102>

- 968 Jacquier H, Birgy A, Le Nagard H, Mechulam Y, Schmitt E, Glodt J, Bercot B, Petit  
969 E, Poulain J, Barnaud G, et al. 2013. Capturing the mutational landscape of the  
970 beta-lactamase TEM-1. *Proceedings of the National Academy of Sciences of the*  
971 *United States of America* 110:13067-13072.  
972 <http://dx.doi.org/10.1073/pnas.1215206110>
- 973 Jahn LJ, Munck C, Ellabaan MMH, Sommer MOA. 2017. Adaptive Laboratory  
974 Evolution of Antibiotic Resistance Using Different Selection Regimes Lead to  
975 Similar Phenotypes and Genotypes. *Front Microbiol* 8:816.  
976 <http://dx.doi.org/10.3389/fmicb.2017.00816>
- 977 Jerison ER, Desai MM. 2015. Genomic investigations of evolutionary dynamics and  
978 epistasis in microbial evolution experiments. *Curr Opin Genet Dev* 35:33-39.  
979 <http://dx.doi.org/10.1016/j.gde.2015.08.008>
- 980 Jimenez JI, Xulvi-Brunet R, Campbell GW, Turk-MacLeod R, Chen IA. 2013.  
981 Comprehensive experimental fitness landscape and evolutionary network for small  
982 RNA. *Proceedings of the National Academy of Sciences of the United States of*  
983 *America* 110:14984-14989. <http://dx.doi.org/10.1073/pnas.1307604110>
- 984 Kelley LA, Mezulis S, Yates CM, Wass MN, Sternberg MJ. 2015. The Phyre2 web  
985 portal for protein modeling, prediction and analysis. *Nat Protoc* 10:845-858.  
986 <http://dx.doi.org/10.1038/nprot.2015.053>
- 987 Kishimoto T, Iijima L, Tatsumi M, Ono N, Oyake A, Hashimoto T, Matsuo M,  
988 Okubo M, Suzuki S, Mori K, et al. 2010. Transition from positive to neutral in  
989 mutation fixation along with continuing rising fitness in thermal adaptive  
990 evolution. *PLoS genetics* 6:e1001164.  
991 <http://dx.doi.org/10.1371/journal.pgen.1001164>
- 992 Knoppel A, Knopp M, Albrecht LM, Lundin E, Lustig U, Nasvall J, Andersson DI.  
993 2018. Genetic Adaptation to Growth Under Laboratory Conditions in *Escherichia*  
994 *coli* and *Salmonella enterica*. *Front Microbiol* 9:756.  
995 <http://dx.doi.org/10.3389/fmicb.2018.00756>
- 996 Koskiniemi S, Sun S, Berg OG, Andersson DI. 2012. Selection-driven gene loss in  
997 bacteria. *PLoS genetics* 8:e1002787.  
998 <http://dx.doi.org/10.1371/journal.pgen.1002787>

- 999 Kram KE, Geiger C, Ismail WM, Lee H, Tang H, Foster PL, Finkel SE. 2017.  
1000 Adaptation of *Escherichia coli* to Long-Term Serial Passage in Complex Medium:  
1001 Evidence of Parallel Evolution. *mSystems* 2.  
1002 <http://dx.doi.org/10.1128/mSystems.00192-16>
- 1003 LaCroix RA, Sandberg TE, O'Brien EJ, Utrilla J, Ebrahim A, Guzman GI, Szubin R,  
1004 Palsson BO, Feist AM. 2015. Use of adaptive laboratory evolution to discover key  
1005 mutations enabling rapid growth of *Escherichia coli* K-12 MG1655 on glucose  
1006 minimal medium. *Appl Environ Microbiol* 81:17-30.  
1007 <http://dx.doi.org/10.1128/AEM.02246-14>
- 1008 Lambertsen L, Sternberg C, Molin S. 2004. Mini-Tn7 transposons for site-specific  
1009 tagging of bacteria with fluorescent proteins. *Environmental microbiology* 6:726-  
1010 732. <http://dx.doi.org/10.1111/j.1462-2920.2004.00605.x>
- 1011 Lee MC, Marx CJ. 2012. Repeated, selection-driven genome reduction of accessory  
1012 genes in experimental populations. *PLoS genetics* 8:e1002651.  
1013 <http://dx.doi.org/10.1371/journal.pgen.1002651>
- 1014 Lee VT, Matewish JM, Kessler JL, Hyodo M, Hayakawa Y, Lory S. 2007. A cyclic-  
1015 di-GMP receptor required for bacterial exopolysaccharide production. *Mol*  
1016 *Microbiol* 65:1474-1484. <http://dx.doi.org/10.1111/j.1365-2958.2007.05879.x>
- 1017 Liang ZX. 2015. The expanding roles of c-di-GMP in the biosynthesis of  
1018 exopolysaccharides and secondary metabolites. *Nat Prod Rep* 32:663-683.  
1019 <http://dx.doi.org/10.1039/c4np00086b>
- 1020 Lind PA, Arvidsson L, Berg OG, Andersson DI. 2017a. Variation in Mutational  
1021 Robustness between Different Proteins and the Predictability of Fitness Effects.  
1022 *Molecular biology and evolution* 34:408-418.  
1023 <http://dx.doi.org/10.1093/molbev/msw239>
- 1024 Lind PA, Farr AD, Rainey PB. 2017b. Evolutionary convergence in experimental  
1025 *Pseudomonas* populations. *ISME J* 11:589-600.  
1026 <http://dx.doi.org/10.1038/ismej.2016.157>
- 1027 Lind PA, Farr AD, Rainey PB. 2015. Experimental evolution reveals hidden diversity  
1028 in evolutionary pathways. *Elife* 4. <http://dx.doi.org/10.7554/eLife.07074>

- 1029 Lind PA, Libby E, Herzog J, Rainey PB. 2018. Disentangling the effects of genetic  
1030 architecture, mutational bias and selection on evolutionary forecasting. *bioRxiv*.  
1031 <http://dx.doi.org/10.1101/335711>
- 1032 Long A, Liti G, Luptak A, Tenailon O. 2015. Elucidating the molecular architecture  
1033 of adaptation via evolve and resequence experiments. *Nature reviews. Genetics*  
1034 16:567-582. <http://dx.doi.org/10.1038/nrg3937>
- 1035 Lukacisinova M, Bollenbach T. 2017. Toward a quantitative understanding of  
1036 antibiotic resistance evolution. *Curr Opin Biotechnol* 46:90-97.  
1037 <http://dx.doi.org/10.1016/j.copbio.2017.02.013>
- 1038 Lundin E, Tang PC, Guy L, Nasvall J, Andersson DI. 2017. Experimental  
1039 determination and prediction of the fitness effects of random point mutations in the  
1040 biosynthetic enzyme HisA. *Molecular biology and evolution*.  
1041 <http://dx.doi.org/10.1093/molbev/msx325>
- 1042 McDonald MJ, Cooper TF, Beaumont HJE, Rainey PB. 2011. The distribution of  
1043 fitness effects of new beneficial mutations in *Pseudomonas fluorescens*. *Biology*  
1044 *Letters* 7:98-100. <http://dx.doi.org/Doi 10.1098/Rsbl.2010.0547>
- 1045 McDonald MJ, Gehrig SM, Meintjes PL, Zhang XX, Rainey PB. 2009. Adaptive  
1046 divergence in experimental populations of *Pseudomonas fluorescens*. IV. Genetic  
1047 constraints guide evolutionary trajectories in a parallel adaptive radiation. *Genetics*  
1048 183:1041-1053. <http://dx.doi.org/10.1534/genetics.109.107110>
- 1049 McElroy KE, Hui JG, Woo JK, Luk AW, Webb JS, Kjelleberg S, Rice SA, Thomas  
1050 T. 2014. Strain-specific parallel evolution drives short-term diversification during  
1051 *Pseudomonas aeruginosa* biofilm formation. *Proceedings of the National Academy*  
1052 *of Sciences of the United States of America* 111:E1419-1427.  
1053 <http://dx.doi.org/10.1073/pnas.1314340111>
- 1054 Morgan JL, McNamara JT, Zimmer J. 2014. Mechanism of activation of bacterial  
1055 cellulose synthase by cyclic di-GMP. *Nat Struct Mol Biol* 21:489-496.  
1056 <http://dx.doi.org/10.1038/nsmb.2803>
- 1057 O'Neill AJ, Huovinen T, Fishwick CW, Chopra I. 2006. Molecular genetic and  
1058 structural modeling studies of *Staphylococcus aureus* RNA polymerase and the

- 1059 fitness of rifampin resistance genotypes in relation to clinical prevalence.  
1060 Antimicrob Agents Chemother 50:298-309.  
1061 <http://dx.doi.org/10.1128/AAC.50.1.298-309.2006>
- 1062 Orgogozo V. 2015. Replaying the tape of life in the twenty-first century. Interface  
1063 Focus 5:20150057. <http://dx.doi.org/10.1098/rsfs.2015.0057>
- 1064 Rainey PB, Travisano M. 1998. Adaptive radiation in a heterogeneous environment.  
1065 Nature 394:69-72. <http://dx.doi.org/10.1038/27900>
- 1066 Romling U, Galperin MY, Gomelsky M. 2013. Cyclic di-GMP: the first 25 years of a  
1067 universal bacterial second messenger. Microbiology and molecular biology  
1068 reviews : MMBR 77:1-52. <http://dx.doi.org/10.1128/MMBR.00043-12>
- 1069 Sandberg TE, Pedersen M, LaCroix RA, Ebrahim A, Bonde M, Herrgard MJ, Palsson  
1070 BO, Sommer M, Feist AM. 2014. Evolution of Escherichia coli to 42 degrees C  
1071 and subsequent genetic engineering reveals adaptive mechanisms and novel  
1072 mutations. Molecular biology and evolution 31:2647-2662.  
1073 <http://dx.doi.org/10.1093/molbev/msu209>
- 1074 Sankar TS, Wastuwidyaningtyas BD, Dong Y, Lewis SA, Wang JD. 2016. The nature  
1075 of mutations induced by replication-transcription collisions. Nature.  
1076 <http://dx.doi.org/10.1038/nature18316>
- 1077 Schenk MF, Szendro IG, Krug J, de Visser JA. 2012. Quantifying the adaptive  
1078 potential of an antibiotic resistance enzyme. PLoS genetics 8:e1002783.  
1079 <http://dx.doi.org/10.1371/journal.pgen.1002783>
- 1080 Silby MW, Cerdeno-Tarraga AM, Vernikos GS, Giddens SR, Jackson RW, Preston  
1081 GM, Zhang XX, Moon CD, Gehrig SM, Godfrey SA, et al. 2009. Genomic and  
1082 genetic analyses of diversity and plant interactions of Pseudomonas fluorescens.  
1083 Genome biology 10:R51. <http://dx.doi.org/10.1186/gb-2009-10-5-r51>
- 1084 Sleight SC, Orlic C, Schneider D, Lenski RE. 2008. Genetic basis of evolutionary  
1085 adaptation by Escherichia coli to stressful cycles of freezing, thawing and growth.  
1086 Genetics 180:431-443. <http://dx.doi.org/10.1534/genetics.108.091330>

- 1087 Sommer MOA, Munck C, Toft-Kehler RV, Andersson DI. 2017. Prediction of  
1088 antibiotic resistance: time for a new preclinical paradigm? *Nature reviews.*  
1089 *Microbiology* 15:689-696. <http://dx.doi.org/10.1038/nrmicro.2017.75>
- 1090 Spiers AJ, Bohannon J, Gehrig SM, Rainey PB. 2003. Biofilm formation at the air-  
1091 liquid interface by the *Pseudomonas fluorescens* SBW25 wrinkly spreader requires  
1092 an acetylated form of cellulose. *Molecular Microbiology* 50:15-27.
- 1093 Spiers AJ, Kahn SG, Bohannon J, Travisano M, Rainey PB. 2002. Adaptive  
1094 divergence in experimental populations of *Pseudomonas fluorescens*. I. Genetic  
1095 and phenotypic bases of wrinkly spreader fitness. *Genetics* 161:33-46.
- 1096 Spiers AJ, Rainey PB. 2005. The *Pseudomonas fluorescens* SBW25 wrinkly spreader  
1097 biofilm requires attachment factor, cellulose fibre and LPS interactions to maintain  
1098 strength and integrity. *Microbiology* 151:2829-2839.  
1099 <http://dx.doi.org/10.1099/mic.0.27984-0>
- 1100 Steiner S, Lori C, Boehm A, Jenal U. 2013. Allosteric activation of exopolysaccharide  
1101 synthesis through cyclic di-GMP-stimulated protein-protein interaction. *EMBO J*  
1102 32:354-368. <http://dx.doi.org/10.1038/emboj.2012.315>
- 1103 Tenaillon O, Rodriguez-Verdugo A, Gaut RL, McDonald P, Bennett AF, Long AD,  
1104 Gaut BS. 2012. The molecular diversity of adaptive convergence. *Science*  
1105 335:457-461. <http://dx.doi.org/10.1126/science.1212986>
- 1106 Whiteside MD, Winsor GL, Laird MR, Brinkman FS. 2013. OrtholugeDB: a bacterial  
1107 and archaeal orthology resource for improved comparative genomic analysis.  
1108 *Nucleic Acids Res* 41:D366-376. <http://dx.doi.org/10.1093/nar/gks1241>
- 1109 Whitney JC, Whitfield GB, Marmont LS, Yip P, Neculai AM, Lobsanov YD,  
1110 Robinson H, Ohman DE, Howell PL. 2015. Dimeric c-di-GMP is required for  
1111 post-translational regulation of alginate production in *Pseudomonas aeruginosa*. *J*  
1112 *Biol Chem* 290:12451-12462. <http://dx.doi.org/10.1074/jbc.M115.645051>
- 1113 Wichman HA, Badgett MR, Scott LA, Boulianne CM, Bull JJ. 1999. Different  
1114 trajectories of parallel evolution during viral adaptation. *Science* 285:422-424.
- 1115 Winsor GL, Griffiths EJ, Lo R, Dhillon BK, Shay JA, Brinkman FS. 2016. Enhanced  
1116 annotations and features for comparing thousands of *Pseudomonas* genomes in the

1117 Pseudomonas genome database. Nucleic Acids Res 44:D646-653.

1118 <http://dx.doi.org/10.1093/nar/gkv1227>

1119



**Figure 5 - source data. Mutations found after experimental evolution**

| Genome position<br>CP000076.1 | Type         | Change            | Gene position | Gene locus | Gene symbol | Effect                                          | Mutation found in SBW25 |
|-------------------------------|--------------|-------------------|---------------|------------|-------------|-------------------------------------------------|-------------------------|
| 859290                        | Transition   | g->a              | -129          | PFL_0740   | recC        | rrfB terminator/recCBD promoter upstream awsXRO | No                      |
| 859290                        | Transition   | g->a              | -129          | PFL_0740   | recC        | rrfB terminator/recCBD promoter upstream awsXRO | No                      |
| 868744                        | Transversion | c->a              | 101           | PFL_0743   | awsX, yfiR  | S34Y                                            | No                      |
| 868932                        | Transversion | t->g              | 289           | PFL_0743   | awsX, yfiR  | Y97D                                            | No                      |
| 869088                        | Transversion | t->g              | 445           | PFL_0743   | awsX, yfiR  | C149G                                           | No                      |
| 869281                        | Transversion | t->g              | 638           | PFL_0743   | awsX, yfiR  | V213G                                           | No                      |
| 869281                        | Transversion | t->g              | 638           | PFL_0743   | awsX, yfiR  | V213G                                           | No                      |
| 869281                        | Transversion | t->g              | 638           | PFL_0743   | awsX, yfiR  | V213G                                           | No                      |
| 868832-868840                 | Deletion     | Deletion 9 bp     | 189-197       | PFL_0743   | awsX, yfiR  | Deletion F63-L65                                | No                      |
| 868832-868840                 | Deletion     | Deletion 9 bp     | 189-197       | PFL_0743   | awsX, yfiR  | Deletion F63-L65                                | No                      |
| 869040-869072                 | Deletion     | Deletion 33 bp    | 397-429       | PFL_0743   | awsX, yfiR  | Deletion V133-P143                              | No                      |
| 869913                        | Transition   | c->t              | 581           | PFL_0744   | awsR, yfiN  | A194V                                           | Yes                     |
| 869994                        | Transition   | a->g              | 662           | PFL_0744   | awsR, yfiN  | D221G                                           | D->A                    |
| 870002                        | Transition   | c->t              | 670           | PFL_0744   | awsR, yfiN  | L226F                                           | No                      |
| 1301093                       | Transition   | c->t              | 1982          | PFL_1133   | wspE        | S661L                                           | Yes                     |
| 1302246                       | Transition   | g->a              | 808           | PFL_1134   | wspF        | G270R                                           | Yes                     |
| 1302250                       | Transversion | t->g              | 812           | PFL_1134   | wspF        | V271G                                           | No                      |
| 1302250                       | Transversion | t->g              | 812           | PFL_1134   | wspF        | V271G                                           | No                      |
| 1302250                       | Transversion | t->g              | 812           | PFL_1134   | wspF        | V271G                                           | No                      |
| 1302250                       | Transversion | t->g              | 812           | PFL_1134   | wspF        | V271G                                           | No                      |
| 1302250                       | Transversion | t->g              | 812           | PFL_1134   | wspF        | V271G                                           | No                      |
| 1302250                       | Transversion | t->g              | 812           | PFL_1134   | wspF        | V271G                                           | No                      |
| 1302250                       | Transversion | t->g              | 812           | PFL_1134   | wspF        | V271G                                           | No                      |
| 1302250                       | Transversion | t->g              | 812           | PFL_1134   | wspF        | V271G                                           | No                      |
| 1302250                       | Transversion | t->g              | 812           | PFL_1134   | wspF        | V271G                                           | No                      |
| 1302250                       | Transversion | t->g              | 812           | PFL_1134   | wspF        | V271G                                           | No                      |
| 1302250                       | Transversion | t->g              | 812           | PFL_1134   | wspF        | V271G                                           | No                      |
| 1302327                       | Transition   | c->a              | 889           | PFL_1134   | wspF        | Q297K                                           | Q->R                    |
| 1302327                       | Transition   | c->a              | 889           | PFL_1134   | wspF        | Q297K                                           | Q->R                    |
| 1301579-1301593               | Duplication  | Duplication 15 bp | 141-155       | PFL_1134   | wspF        | Duplication L51-I55                             | Del L51-I55             |
| 3548383                       | Transition   | c->t              | -98           | PFL_3078   |             | PFL_3078-PFL_3093 promoter                      |                         |
| 3548383                       | Transition   | c->t              | -98           | PFL_3078   |             | PFL_3078-PFL_3093 promoter                      |                         |
| 3548385                       | Transition   | c->t              | -96           | PFL_3078   |             | PFL_3078-PFL_3093 promoter                      |                         |
| 6114402                       | Transversion | a->t              | 2237          | PFL_5345   | mwsR, morA  | Q746L                                           | No                      |
| 6114696                       | Transition   | a->g              | 2531          | PFL_5345   | mwsR, morA  | H844R                                           | No                      |
| 6114940                       | Transition   | g->a              | 2775          | PFL_5345   | mwsR, morA  | M925I                                           | Yes                     |
| 6115236                       | Transversion | t->a              | 3071          | PFL_5345   | mwsR, morA  | L1024Q                                          | No                      |
| 6115406                       | Transition   | g->a              | 3241          | PFL_5345   | mwsR, morA  | E1081K                                          | Yes                     |
| 6115406                       | Transition   | g->a              | 3241          | PFL_5345   | mwsR, morA  | E1081K                                          | Yes                     |
| 6115406                       | Transition   | g->a              | 3241          | PFL_5345   | mwsR, morA  | E1081K                                          | Yes                     |
| 6115406                       | Transition   | g->a              | 3241          | PFL_5345   | mwsR, morA  | E1081K                                          | Yes                     |
| 6115415                       | Transition   | g->a              | 3250          | PFL_5345   | mwsR, morA  | G1084R                                          | G->S                    |
| 6115107-6115130               | Duplication  | Duplication 24 bp | 2942-2965     | PFL_5345   | mwsR, morA  | P981-S988                                       | No                      |

**Figure 7 - source data. Fitness assays**

**Invasion - selection coefficients**

|                    |       |       |        |       |       |       |        |       |        |
|--------------------|-------|-------|--------|-------|-------|-------|--------|-------|--------|
| Wild type          | 0,003 | 0,002 | -0,005 | 0,012 | 0,013 | 0,010 | -0,039 | 0,021 | -0,017 |
| WspF V271G         | 0,363 | 0,330 | 0,303  | 0,318 | 0,319 | 0,340 |        |       |        |
| WspF Q297K         | 0,362 | 0,225 | 0,347  | 0,331 | 0,269 | 0,282 |        |       |        |
| WspE S661L         | 0,334 | 0,349 | 0,377  | 0,362 | 0,335 | 0,391 |        |       |        |
| AwsX del V133-P143 | 0,300 | 0,219 | 0,358  | 0,223 | 0,271 | 0,261 |        |       |        |
| AwsR A194V         | 0,308 | 0,351 | 0,280  | 0,262 | 0,292 | 0,262 |        |       |        |
| Promoter AwsXRO    | 0,412 | 0,526 | 0,476  | 0,348 | 0,336 | 0,376 |        |       |        |
| MwsR M925I         | 0,392 | 0,394 | 0,432  | 0,346 | 0,341 | 0,373 |        |       |        |
| MwsR E1081K        | 0,322 | 0,420 | 0,357  | 0,326 | 0,321 | 0,283 |        |       |        |
| PFL_3078 Promoter  | 0,313 | 0,351 | 0,320  | 0,321 | 0,334 | 0,326 |        |       |        |

**Competition - selection coefficients**

|                   |        |        |        |        |        |       |        |       |  |
|-------------------|--------|--------|--------|--------|--------|-------|--------|-------|--|
| Wild type         | -0,230 | -0,207 | -0,196 | -0,175 |        |       |        |       |  |
| WspF V271G        | 0,033  | -0,021 | -0,011 | -0,029 | -0,014 | 0,027 | -0,015 | 0,010 |  |
| WspF Q297K        | 0,015  | 0,017  | -0,009 | -0,010 |        |       |        |       |  |
| WspE S661L        | -0,008 | 0,001  | 0,002  | 0,050  |        |       |        |       |  |
| AwsX ΔV133-P143   | -0,030 | -0,082 | -0,088 | -0,058 |        |       |        |       |  |
| AwsR A194V        | -0,113 | -0,079 | 0,008  | -0,020 |        |       |        |       |  |
| Promoter AwsXRO   | 0,041  | 0,009  | 0,034  | 0,039  |        |       |        |       |  |
| MwsR M925I        | -0,006 | -0,007 | -0,011 | 0,003  |        |       |        |       |  |
| MwsR E1081K       | 0,085  | 0,072  | 0,036  | 0,050  |        |       |        |       |  |
| PFL_3078 Promoter | -0,066 | -0,146 | -0,088 | -0,102 |        |       |        |       |  |

**Figure 8 - source data. Fitness assays for del pel mutants**

**Invasion - selection coefficients**

|                                |       |       |       |       |       |       |
|--------------------------------|-------|-------|-------|-------|-------|-------|
| <i>Δpel</i> WspF V271G         | 0,212 | 0,253 | 0,227 | 0,199 | 0,197 | 0,201 |
| <i>Δpel</i> WspF Q297K         | 0,210 | 0,162 | 0,173 | 0,176 | 0,212 | 0,223 |
| <i>Δpel</i> AwsX del V133-P143 | 0,311 | 0,222 | 0,184 | 0,202 | 0,203 | 0,178 |
| <i>Δpel</i> mwsR E1081K        | 0,225 | 0,209 | 0,248 | 0,204 | 0,185 | 0,205 |

**Competition - selection coefficients**

|                                |        |        |        |        |
|--------------------------------|--------|--------|--------|--------|
| <i>Δpel</i> WspF V271G         | -0,171 | -0,177 | -0,206 | -0,174 |
| <i>Δpel</i> WspF Q297K         | -0,041 | -0,114 | -0,104 | -0,069 |
| <i>Δpel</i> AwsX del V133-P143 | -0,171 | -0,104 | -0,200 | -0,151 |
| <i>Δpel</i> MwsR E1081K        | -0,042 | -0,025 | -0,112 | -0,072 |

**Table S1. Oligonucleotide primers used for PCR, sequencing and genetic reconstructions**

**Cloning**

pEX18Gm\_MCS\_F      tgttggtggaattgtgag  
pEX18Gm\_MCS\_R      ctgcaaggcgattaagtg

***wsp* operon**

PFL\_1133\_EcoRI\_F      agttgctggcggagaaaac  
WspE\_1550F            tccccgtggccatatacga  
WspE\_2119F            atcaccgacatcgacatgc  
WspE\_2213F            gtctacaaggaccgtga  
WspF\_154R             caccggcatgatcaggccat  
WspR\_70R              gttcggcgatcatggcctg  
WspR\_398F             tggtggcgcgcattcgcta  
WspR\_553R             ccaactccagctccaggta  
WspR\_620R             gtaggtcttgaagtagtcg

***aws* operon**

RecC\_F\_HindIII        tagaagcttctgataaccgccaagagttc  
RecC\_R\_KpnI            catggtaccccagtcggctcgatatacct  
recD\_F\_EcoRI          acggaattcccactacctgaatgtactg  
PFL\_0743-SalI\_F        tgtgtgctgtcgaccattc  
awsR\_182R              agctgatggagcgggcatca  
awsR\_677F              cgacttcaacgcctgct  
awsO\_DR                ttacatccgcgaggtgac  
PFL\_0746\_F\_HindIII    tgcaagcttcttctcatcaccgcaa

***mwsR***

mwsR\_HindIII\_F        gttaagcttagaccagctgttctctgttc  
mwsR\_2144F            gccgcgacatcagccagca  
PFL\_5345\_SeqF         gaaaaggacctgcgcatg  
PFL\_5345\_SeqR         gaactgcttgaggtagttc  
mwsR\_3599R            gaaggtgcggtcgatcttca  
mwsR\_SalI\_R            aggccgtcgacgaaggtgc

***PFL\_3078-3093***

PFL\_3077\_KpnI\_F        catggtaccgcgaaagtcccggttgaag  
PFL\_3078\_HindIII\_R    tagaagcttgttgccatctcgttcag

***pelABCDEFGHI***

PFL\_2971\_F\_EcoRI      ctggaattcagcgagtactacctggactt  
PFL\_2972\_DelCh        caaggccaatgcggtaaaca  
PFL\_2972\_UR\_SOE      attgggccctctatgtcgacatcaactcactcttcagtagatcaatct  
PFL\_2978\_DF\_SOE      gatgtcgacatagaggcccaatttgaggagcatcggcaagc  
PFL\_2979\_R\_HindIII    agtgcceaagagcagaagc
